# Supplementary material for: Theoretical and kinetic study of the H-atom abstraction reactions by Ḣ atom from alkyl cyclohexanes
Source: Royal Society of Chemistry journal article supplement (doi:10.1039/d4cp01117a), 2024-01-01
Supplement: d4cp01117a1.pdf [file d4cp01117a1.pdf]

## *Supplementary Material*

# **Kinetic Properties Study of H-atom Abstraction by H atom from Alkyl Cyclohexanes**

Yang Ma<sup>a,1</sup>, Zhaolin Fu<sup>b,1</sup>, Hao-Ting Guo<sup>a</sup>, Mingxia Liu<sup>a</sup>, Zhiping Tao<sup>b</sup>, Chong-Wen Zhou<sup>\*a,c</sup>

<sup>a</sup> *School of Energy and Power Engineering, Beihang University, Beijing 100191, PR China*

<sup>b</sup> *Research Institute of Petroleum Processing, Sinopec, 18 Xueyuan Road, Haidian District, Beijing 100083, PR China*

<sup>c</sup> *Combustion Chemistry Centre, School of Biological and Chemical Sciences, MaREI, University of Galway,*

*Galway H91 TK33, Ireland.*

E-mail address: [chongwen.zhou@universityofgalway.ie](mailto:chongwen.zhou@universityofgalway.ie) (C.-W. Zhou)

Table S1. Structure for reactants and products studied in this work

| Name | Structure                                                                            |
|------|--------------------------------------------------------------------------------------|
| MCH  |    |
| MP1  |    |
| MP2  |    |
| MP3  |    |
| MP4  |    |
| MP5  |   |
| ECH  |  |
| EP1  |  |
| EP2  |  |
| EP3  |  |
| EP4  |  |
| EP5  |  |
| EP6  |  |

|        |                                                                                      |
|--------|--------------------------------------------------------------------------------------|
| $nPCH$ |    |
| $nP1$  |    |
| $nP2$  |    |
| $nP3$  |    |
| $nP4$  |    |
| $nP5$  |    |
| $nP6$  |   |
| $nP7$  |  |
| $iPCH$ |  |
| $iP1$  |  |
| $iP2$  |  |
| $iP3$  |  |
| $iP4$  |  |
| $iP5$  |  |

|              |                                                                                      |
|--------------|--------------------------------------------------------------------------------------|
| <i>i</i> P6  | 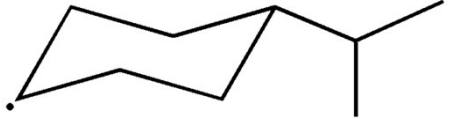   |
| <i>s</i> BCH |    |
| <i>s</i> BP1 |    |
| <i>s</i> BP2 |    |
| <i>s</i> BP3 |    |
| <i>s</i> BP4 |    |
| <i>s</i> BP5 |   |
| <i>s</i> BP6 |  |
| <i>s</i> BP7 |  |
| <i>s</i> BP8 |  |
| <i>i</i> BCH |  |
| <i>i</i> BP1 |  |

|              |                                                                                      |
|--------------|--------------------------------------------------------------------------------------|
| <i>i</i> BP2 | 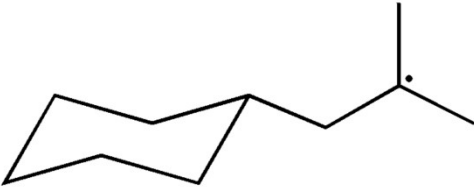   |
| <i>i</i> BP3 |    |
| <i>i</i> BP4 |    |
| <i>i</i> BP5 |   |
| <i>i</i> BP6 |  |
| <i>i</i> BP7 |  |

Table S2. T1 diagnostic values for the transition state, product and reactant calculated in this work.

| Reactions                                                 | T1 diagnostic values |                                            |                     |
|-----------------------------------------------------------|----------------------|--------------------------------------------|---------------------|
|                                                           | The transition state | The product<br>(alkyl cyclohexyl radicals) | The reactant        |
| $\text{MCH} + \dot{\text{H}} = \text{MP1} + \text{H}_2$   | 0.0106               | 0.0097                                     | MCH:0.0087          |
| $\text{MCH} + \dot{\text{H}} = \text{MP2} + \text{H}_2$   | 0.0099               | 0.0110                                     |                     |
| $\text{MCH} + \dot{\text{H}} = \text{MP3} + \text{H}_2$   | 0.0099               | 0.0107                                     |                     |
| $\text{MCH} + \dot{\text{H}} = \text{MP4} + \text{H}_2$   | 0.0098               | 0.0105                                     |                     |
| $\text{MCH} + \dot{\text{H}} = \text{MP5} + \text{H}_2$   | 0.0097               | 0.0105                                     |                     |
| $\text{ECH} + \dot{\text{H}} = \text{EP1} + \text{H}_2$   | 0.0101               | 0.0096                                     | ECH:0.0087          |
| $\text{ECH} + \dot{\text{H}} = \text{EP2} + \text{H}_2$   | 0.0096               | 0.0103                                     |                     |
| $\text{ECH} + \dot{\text{H}} = \text{EP3} + \text{H}_2$   | 0.0099               | 0.0110                                     |                     |
| $\text{ECH} + \dot{\text{H}} = \text{EP4} + \text{H}_2$   | 0.0098               | 0.0107                                     |                     |
| $\text{ECH} + \dot{\text{H}} = \text{EP5} + \text{H}_2$   | 0.0097               | 0.0104                                     |                     |
| $\text{ECH} + \dot{\text{H}} = \text{EP6} + \text{H}_2$   | 0.0109               | 0.0104                                     |                     |
| $n\text{PCH} + \dot{\text{H}} = n\text{P1} + \text{H}_2$  | 0.0100               | 0.0096                                     | <i>n</i> PCH:0.0088 |
| $n\text{PCH} + \dot{\text{H}} = n\text{P2} + \text{H}_2$  | 0.0094               | 0.0094                                     |                     |
| $n\text{PCH} + \dot{\text{H}} = n\text{P3} + \text{H}_2$  | 0.0096               | 0.0103                                     |                     |
| $n\text{PCH} + \dot{\text{H}} = n\text{P4} + \text{H}_2$  | 0.0098               | 0.0109                                     |                     |
| $n\text{PCH} + \dot{\text{H}} = n\text{P5} + \text{H}_2$  | 0.0097               | 0.0106                                     |                     |
| $n\text{PCH} + \dot{\text{H}} = n\text{P6} + \text{H}_2$  | 0.0096               | 0.0102                                     |                     |
| $n\text{PCH} + \dot{\text{H}} = n\text{P7} + \text{H}_2$  | 0.0095               | 0.0102                                     |                     |
| $i\text{PCH} + \dot{\text{H}} = i\text{P1} + \text{H}_2$  | 0.0103               | 0.0098                                     | <i>i</i> PCH:0.0087 |
| $i\text{PCH} + \dot{\text{H}} = i\text{P2} + \text{H}_2$  | 0.0098               | 0.0106                                     |                     |
| $i\text{PCH} + \dot{\text{H}} = i\text{P3} + \text{H}_2$  | 0.0098               | 0.0109                                     |                     |
| $i\text{PCH} + \dot{\text{H}} = i\text{P4} + \text{H}_2$  | 0.0098               | 0.0104                                     |                     |
| $i\text{PCH} + \dot{\text{H}} = i\text{P5} + \text{H}_2$  | 0.0097               | 0.0103                                     |                     |
| $i\text{PCH} + \dot{\text{H}} = i\text{P6} + \text{H}_2$  | 0.0097               | 0.0103                                     |                     |
| $s\text{BCH} + \dot{\text{H}} = s\text{BP1} + \text{H}_2$ | 0.0104               | 0.0098                                     | <i>s</i> BCH:0.0089 |
| $s\text{BCH} + \dot{\text{H}} = s\text{BP2} + \text{H}_2$ | 0.0097               | 0.0101                                     |                     |
| $s\text{BCH} + \dot{\text{H}} = s\text{BP3} + \text{H}_2$ | 0.0103               | 0.0097                                     |                     |
| $s\text{BCH} + \dot{\text{H}} = s\text{BP4} + \text{H}_2$ | 0.0099               | 0.0097                                     |                     |
| $s\text{BCH} + \dot{\text{H}} = s\text{BP5} + \text{H}_2$ | 0.0097               | 0.0108                                     |                     |
| $s\text{BCH} + \dot{\text{H}} = s\text{BP6} + \text{H}_2$ | 0.0098               | 0.0106                                     |                     |
| $s\text{BCH} + \dot{\text{H}} = s\text{BP7} + \text{H}_2$ | 0.0096               | 0.0102                                     |                     |
| $s\text{BCH} + \dot{\text{H}} = s\text{BP8} + \text{H}_2$ | 0.0097               | 0.0102                                     |                     |
| $i\text{BCH} + \dot{\text{H}} = i\text{BP1} + \text{H}_2$ | 0.0102               | 0.0096                                     | <i>i</i> BCH:0.0088 |
| $i\text{BCH} + \dot{\text{H}} = i\text{BP2} + \text{H}_2$ | 0.0096               | 0.0105                                     |                     |
| $i\text{BCH} + \dot{\text{H}} = i\text{BP3} + \text{H}_2$ | 0.0098               | 0.0103                                     |                     |
| $i\text{BCH} + \dot{\text{H}} = i\text{BP4} + \text{H}_2$ | 0.0096               | 0.0108                                     |                     |
| $i\text{BCH} + \dot{\text{H}} = i\text{BP5} + \text{H}_2$ | 0.0097               | 0.0106                                     |                     |
| $i\text{BCH} + \dot{\text{H}} = i\text{BP6} + \text{H}_2$ | 0.0096               | 0.0102                                     |                     |
| $i\text{BCH} + \dot{\text{H}} = i\text{BP7} + \text{H}_2$ | 0.0096               | 0.0102                                     |                     |

Table S3. Comparison of the frequencies used in the calculation of high-pressure limit rate constants. The optimized Cartesian coordinates and rotational constants of all alkyl cyclohexanes and the transition states are listed in the left column. The results of removing the torsional frequencies by visual inspection are listed in the middle column, and the bold numbers represent the torsional frequencies removed.

|                   | Cartesian coordinates and rotational constants |             |             | Visual      |         |         |         |         |               |
|-------------------|------------------------------------------------|-------------|-------------|-------------|---------|---------|---------|---------|---------------|
| MCH               | C                                              | 1.18829100  | 1.26062300  | -0.21426700 |         |         |         |         |               |
|                   | C                                              | -0.29282300 | 1.25582600  | 0.16972300  |         |         |         |         |               |
|                   | C                                              | -1.01136100 | 0.00001400  | -0.33470500 |         |         |         |         |               |
|                   | C                                              | -0.29283400 | -1.25581000 | 0.16971300  |         |         |         |         |               |
|                   | C                                              | 1.18828500  | -1.26063500 | -0.21426100 |         |         |         |         |               |
|                   | C                                              | 1.89195700  | -0.00000500 | 0.29289900  | 158.18  | 925.29  | 1297.10 | 1501.32 | 3095.77       |
|                   | H                                              | -0.38357300 | 1.29367200  | 1.26391200  | 245.09  | 982.11  | 1336.39 | 1503.82 | 3099.98       |
|                   | H                                              | -0.79101500 | 2.14971500  | -0.21892900 | 312.18  | 987.72  | 1336.43 | 1508.48 | 3117.29       |
|                   | H                                              | 1.27599900  | 1.30564000  | -1.30674100 | 336.60  | 994.41  | 1368.99 | 3014.14 | 3125.96       |
|                   | H                                              | 1.67862000  | 2.15503500  | 0.17952300  | 410.29  | 1056.72 | 1383.29 | 3024.59 | <b>227.80</b> |
|                   | H                                              | -0.38358000 | -1.29364600 | 1.26390100  | 446.46  | 1082.27 | 1387.07 | 3032.16 |               |
|                   | H                                              | -0.79104300 | -2.14969500 | -0.21892900 | 450.67  | 1103.26 | 1387.89 | 3037.37 |               |
|                   | H                                              | 1.67859300  | -2.15504300 | 0.17956400  | 548.04  | 1122.44 | 1405.19 | 3040.93 |               |
|                   | H                                              | 1.27602000  | -1.30568300 | -1.30673200 | 787.06  | 1142.93 | 1411.28 | 3045.60 |               |
|                   | H                                              | 1.88108000  | -0.00000200 | 1.38985100  | 797.10  | 1189.51 | 1480.34 | 3048.19 |               |
|                   | H                                              | 2.94131600  | -0.00000700 | -0.01415000 | 860.23  | 1234.96 | 1487.46 | 3082.06 |               |
|                   | H                                              | -0.95434800 | 0.00001200  | -1.43234500 | 870.81  | 1279.02 | 1489.32 | 3085.02 |               |
|                   | C                                              | -2.48117600 | -0.00000500 | 0.07489300  | 891.13  | 1292.68 | 1493.98 | 3094.52 |               |
|                   | H                                              | -2.57256900 | -0.00072500 | 1.16568100  |         |         |         |         |               |
|                   | H                                              | -2.99861500 | 0.88517500  | -0.30369400 |         |         |         |         |               |
| H                 | -2.99892200                                    | -0.88449400 | -0.30488600 |             |         |         |         |         |               |
|                   | Rotational constants(GHz):                     |             |             |             |         |         |         |         |               |
|                   | 4.22278                                        | 2.19556     | 1.59622     |             |         |         |         |         |               |
| TS <sub>1</sub> α | C                                              | -1.23945200 | -1.26095900 | -0.19436600 |         |         |         |         |               |
|                   | C                                              | 0.25961900  | -1.25979600 | 0.11037100  |         |         |         |         |               |
|                   | C                                              | 0.94622100  | -0.00000700 | -0.43201200 | 1400.91 | 862.31  | 1174.63 | 1458.85 | 3086.47       |
|                   | C                                              | 0.25962500  | 1.25979300  | 0.11036200  | 151.05  | 874.26  | 1179.89 | 1483.37 | 3088.51       |
|                   | C                                              | -1.23944400 | 1.26096100  | -0.19437900 | 240.00  | 890.67  | 1237.34 | 1487.18 | 3096.69       |
|                   | C                                              | -1.91295900 | 0.00000600  | 0.35173800  | 287.37  | 921.00  | 1259.34 | 1490.19 | 3097.14       |
|                   | H                                              | 0.41150900  | -1.29753900 | 1.19678500  | 312.14  | 962.06  | 1291.89 | 1495.15 | 3101.26       |
|                   | H                                              | 0.73686400  | -2.15116000 | -0.30877600 | 353.00  | 987.57  | 1299.28 | 1508.85 | 3101.67       |
|                   | H                                              | -1.38632800 | -1.30518800 | -1.28056200 | 409.92  | 988.78  | 1321.66 | 1664.92 | 3185.50       |
|                   | H                                              | -1.70806400 | -2.15507900 | 0.22515000  | 448.34  | 1056.80 | 1334.17 | 2968.29 | <b>164.96</b> |
|                   | H                                              | 0.41151300  | 1.29754300  | 1.19677600  | 474.53  | 1079.88 | 1369.26 | 3034.73 |               |
|                   | H                                              | 0.73687800  | 2.15115000  | -0.30879100 | 561.96  | 1103.07 | 1378.74 | 3037.24 |               |
|                   | H                                              | -1.70805200 | 2.15508800  | 0.22512800  | 565.91  | 1104.81 | 1386.77 | 3039.80 |               |
|                   | H                                              | -1.38631900 | 1.30518000  | -1.28057600 | 790.07  | 1141.04 | 1388.88 | 3041.86 |               |
|                   | H                                              | -1.84022100 | 0.00001200  | 1.44615400  | 797.09  | 1160.96 | 1402.14 | 3046.76 |               |
|                   | H                                              | -2.97766100 | 0.00000700  | 0.10354400  |         |         |         |         |               |

|                    |                                                                                                                                                                                                                                                                                                                                                                                                                                                                                                                                                                                                                                                                                                                                                                                                                                                                                                                                                            |                                                                                                                                                                                                                                                                                                                                                                                                                                                                                                                           |
|--------------------|------------------------------------------------------------------------------------------------------------------------------------------------------------------------------------------------------------------------------------------------------------------------------------------------------------------------------------------------------------------------------------------------------------------------------------------------------------------------------------------------------------------------------------------------------------------------------------------------------------------------------------------------------------------------------------------------------------------------------------------------------------------------------------------------------------------------------------------------------------------------------------------------------------------------------------------------------------|---------------------------------------------------------------------------------------------------------------------------------------------------------------------------------------------------------------------------------------------------------------------------------------------------------------------------------------------------------------------------------------------------------------------------------------------------------------------------------------------------------------------------|
|                    | H 0.81987900 -0.00000600 -1.52814700<br>C 2.42274900 -0.00001200 -0.13425100<br>H 2.50205400 0.00005000 1.24032200<br>H 2.96434100 -0.90919400 -0.39347700<br>H 2.96436600 0.90913000 -0.39356700<br>H 2.48108700 0.00008900 2.15524900<br>Rotational constants (GHZ):<br>4.01469 2.10117 1.57192                                                                                                                                                                                                                                                                                                                                                                                                                                                                                                                                                                                                                                                          |                                                                                                                                                                                                                                                                                                                                                                                                                                                                                                                           |
| TS <sub>1</sub> α' | C -1.20073500 1.25801200 0.20391200<br>C 0.26806600 1.27013400 -0.22661800<br>C 0.99535800 0.00001200 0.16995900<br>C 0.26808200 -1.27010800 -0.22665700<br>C -1.20070400 -1.25802400 0.20392300<br>C -1.91149200 -0.00001700 -0.29771700<br>H 0.32550400 1.37093600 -1.32188200<br>H 0.78581900 2.13815300 0.19384300<br>H -1.25108400 1.28531600 1.29861500<br>H -1.70463700 2.15626500 -0.16177700<br>H 0.32547700 -1.37084000 -1.32192900<br>H 0.78586900 -2.13814100 0.19373300<br>H -1.70459600 -2.15629700 -0.16173100<br>H -1.25101800 -1.28530400 1.29862800<br>H -1.91834200 -0.00002300 -1.39496100<br>H -2.95530400 -0.00002600 0.02678600<br>H 0.93904900 -0.00002700 1.46846400<br>C 2.47344400 0.00000800 -0.14038300<br>H 2.96415800 0.88633400 0.26893800<br>H 2.96428300 -0.88593900 0.26961200<br>H 2.63290400 -0.00039800 -1.22567000<br>H 0.90980600 -0.00010900 2.45081400<br>Rotational constants (GHZ):<br>3.98820 2.12716 1.58506 | 1317.76i 859.22 1210.93 1469.35 3079.96<br>144.34 867.49 1228.74 1478.64 3080.96<br>222.43 899.44 1254.21 1489.66 3099.85<br>268.98 929.63 1282.45 1492.66 3101.37<br>297.01 978.55 1310.18 1494.07 3103.77<br>326.79 1000.30 1310.91 1499.60 3104.75<br>332.86 1001.36 1357.96 1506.62 3131.72<br>408.60 1054.50 1369.47 2995.36 <b>196.02</b><br>426.95 1087.31 1382.14 2999.15<br>455.81 1106.76 1387.22 3034.64<br>551.05 1124.14 1398.88 3037.52<br>771.98 1150.56 1407.29 3049.57<br>792.81 1150.83 1434.87 3051.41 |



|                             |            |             |             |             |         |         |         |         |               |
|-----------------------------|------------|-------------|-------------|-------------|---------|---------|---------|---------|---------------|
| TS <sub>1</sub> β'          | C          | -1.20051500 | -1.23908100 | -0.30508800 |         |         |         |         |               |
|                             | C          | 0.28708500  | -1.22019100 | -0.03571000 |         |         |         |         |               |
|                             | C          | 1.01005800  | 0.06102000  | -0.39656100 |         |         |         |         |               |
|                             | C          | 0.27888500  | 1.27269200  | 0.19472800  |         |         |         |         |               |
|                             | C          | -1.20460300 | 1.28110500  | -0.17805700 |         |         |         |         |               |
|                             | C          | -1.89067400 | -0.00548500 | 0.28476000  | 1310.09 | 865.85  | 1205.36 | 1475.97 | 3090.48       |
|                             | H          | 0.38783500  | -1.28604900 | 1.30528200  | 152.60  | 870.08  | 1211.93 | 1487.65 | 3091.08       |
|                             | H          | 0.81555600  | -2.12751800 | -0.33533200 | 210.73  | 891.18  | 1232.48 | 1492.38 | 3097.88       |
|                             | H          | -1.36323500 | -1.25665200 | -1.39309000 | 270.47  | 917.58  | 1271.37 | 1501.45 | 3105.10       |
|                             | H          | -1.64467800 | -2.15619600 | 0.09163600  | 307.22  | 982.55  | 1286.34 | 1503.97 | 3108.63       |
|                             | H          | 0.37808900  | 1.23966800  | 1.28744000  | 322.94  | 987.22  | 1319.26 | 1505.25 | 3124.85       |
|                             | H          | 0.76566700  | 2.19301100  | -0.14169300 | 339.48  | 1000.60 | 1331.34 | 1555.53 | 3129.56       |
|                             | H          | -1.69842200 | 2.15192600  | 0.26098100  | 415.27  | 1060.67 | 1359.64 | 2971.51 | <b>236.57</b> |
|                             | H          | -1.30458100 | 1.37431600  | -1.26671100 | 456.35  | 1085.99 | 1367.36 | 3005.77 |               |
|                             | H          | -1.84557600 | -0.06174300 | 1.37851400  | 506.71  | 1100.34 | 1381.96 | 3035.29 |               |
|                             | H          | -2.94768700 | 0.00151800  | 0.00710700  | 575.49  | 1115.58 | 1386.86 | 3040.99 |               |
|                             | H          | 0.97373100  | 0.15709400  | -1.49476400 | 782.44  | 1144.26 | 1403.22 | 3051.80 |               |
|                             | C          | 2.47371500  | 0.02054100  | 0.03590900  | 807.76  | 1153.29 | 1411.45 | 3052.62 |               |
|                             | H          | 2.99717400  | -0.82538800 | -0.41632200 |         |         |         |         |               |
|                             | H          | 2.99321600  | 0.93694100  | -0.25390300 |         |         |         |         |               |
| H                           | 2.54476100 | -0.08019200 | 1.12281600  |             |         |         |         |         |               |
| H                           | 0.42444200 | -1.28433700 | 2.24815400  |             |         |         |         |         |               |
| Rotational constants (GHZ): |            |             |             |             |         |         |         |         |               |
|                             | 3.98189    | 2.13650     | 1.58833     |             |         |         |         |         |               |
| TS <sub>1</sub> γ'          | C          | -1.20051500 | -1.23908100 | -0.30508800 |         |         |         |         |               |
|                             | C          | 0.28708500  | -1.22019100 | -0.03571000 |         |         |         |         |               |
|                             | C          | 1.01005800  | 0.06102000  | -0.39656100 |         |         |         |         |               |
|                             | C          | 0.27888500  | 1.27269200  | 0.19472800  | 1319.19 | 857.35  | 1201.24 | 1470.14 | 3079.79       |
|                             | C          | -1.20460300 | 1.28110500  | -0.17805700 | 152.64  | 871.14  | 1221.50 | 1476.00 | 3086.44       |
|                             | C          | -1.89067400 | -0.00548500 | 0.28476000  | 198.19  | 890.04  | 1246.84 | 1490.95 | 3092.37       |
|                             | H          | 0.38783500  | -1.28604900 | 1.30528200  | 268.12  | 918.28  | 1261.78 | 1500.55 | 3103.41       |
|                             | H          | 0.81555600  | -2.12751800 | -0.33533200 | 290.04  | 979.45  | 1292.70 | 1502.85 | 3118.29       |
|                             | H          | -1.36323500 | -1.25665200 | -1.39309000 | 312.85  | 987.09  | 1317.84 | 1503.85 | 3121.52       |
|                             | H          | -1.64467800 | -2.15619600 | 0.09163600  | 357.71  | 993.49  | 1336.10 | 1545.90 | 3127.90       |
|                             | H          | 0.37808900  | 1.23966800  | 1.28744000  | 422.52  | 1061.73 | 1362.35 | 2989.84 | <b>239.35</b> |
|                             | H          | 0.76566700  | 2.19301100  | -0.14169300 | 437.94  | 1081.10 | 1372.32 | 3006.49 |               |
|                             | H          | -1.69842200 | 2.15192600  | 0.26098100  | 471.11  | 1110.62 | 1382.34 | 3021.49 |               |
|                             | H          | -1.30458100 | 1.37431600  | -1.26671100 | 596.88  | 1122.47 | 1389.17 | 3035.16 |               |
|                             | H          | -1.84557600 | -0.06174300 | 1.37851400  | 785.07  | 1145.57 | 1405.40 | 3049.05 |               |
|                             | H          | -2.94768700 | 0.00151800  | 0.00710700  | 813.44  | 1149.25 | 1413.68 | 3051.53 |               |
|                             | H          | 0.97373100  | 0.15709400  | -1.49476400 |         |         |         |         |               |
|                             | C          | 2.47371500  | 0.02054100  | 0.03590900  |         |         |         |         |               |
|                             | H          | 2.99717400  | -0.82538800 | -0.41632200 |         |         |         |         |               |
|                             | H          | 2.99321600  | 0.93694100  | -0.25390300 |         |         |         |         |               |

|                    |                                                                                                                                                                                                                                                                                                                                                                                                                                                                                                                                                                                                                                                                                                                                                                                                                                                                                                                                                                                                                                         |                                                                                                                                                                                                                                                                                                                                                                                                                                                                                                                         |
|--------------------|-----------------------------------------------------------------------------------------------------------------------------------------------------------------------------------------------------------------------------------------------------------------------------------------------------------------------------------------------------------------------------------------------------------------------------------------------------------------------------------------------------------------------------------------------------------------------------------------------------------------------------------------------------------------------------------------------------------------------------------------------------------------------------------------------------------------------------------------------------------------------------------------------------------------------------------------------------------------------------------------------------------------------------------------|-------------------------------------------------------------------------------------------------------------------------------------------------------------------------------------------------------------------------------------------------------------------------------------------------------------------------------------------------------------------------------------------------------------------------------------------------------------------------------------------------------------------------|
|                    | H 2.54476100 -0.08019200 1.12281600<br>H 0.42444200 -1.28433700 2.24815400<br>Rotational constants (GHZ):<br>3.98502 2.11981 1.57799                                                                                                                                                                                                                                                                                                                                                                                                                                                                                                                                                                                                                                                                                                                                                                                                                                                                                                    |                                                                                                                                                                                                                                                                                                                                                                                                                                                                                                                         |
| TS <sub>1</sub> δ' | C 1.14617700 1.27592600 -0.29297500<br>C -0.31852000 1.25352500 0.15265700<br>C -1.04875300 0.00000000 -0.33927700<br>C -0.31852000 -1.25352500 0.15265600<br>C 1.14617800 -1.27592500 -0.29297500<br>C 1.86047600 0.00000000 0.09150000<br>H -0.36112300 1.27399400 1.24937100<br>H -0.83346700 2.15108500 -0.20291700<br>H 1.18805800 1.38910600 -1.38649800<br>H 1.66281200 2.14192800 0.13002800<br>H -0.36112400 -1.27399500 1.24937000<br>H -0.83346600 -2.15108500 -0.20291900<br>H 1.66281200 -2.14192700 0.13003000<br>H 1.18805900 -1.38910700 -1.38649800<br>H 1.85398100 0.00000000 1.42935600<br>H 2.93085100 0.00000000 -0.11764400<br>H -1.01949900 0.00000000 -1.43830200<br>C -2.50731100 0.00000000 0.10892000<br>H -3.03440500 0.88480900 -0.25666000<br>H -3.03440500 -0.88481000 -0.25665900<br>H -2.56917100 0.00000000 1.20163800<br>H 1.80172600 -0.00000100 2.37526500<br>H -2.56917100 0.00000000 1.20163800<br>H 1.80172600 -0.00000100 2.37526500<br>Rotational constants (GHZ):<br>3.98569 2.11791 1.57923 | 1309.39i 863.76 1211.74 1472.94 3089.20<br>142.80 871.96 1220.00 1482.68 3090.02<br>218.07 898.41 1237.10 1485.14 3090.75<br>263.34 931.65 1253.12 1499.18 3092.37<br>282.67 972.13 1298.38 1502.36 3119.13<br>314.24 982.53 1328.09 1504.07 3122.58<br>346.04 998.18 1332.12 1545.45 3127.57<br>425.17 1055.39 1353.48 3005.65 <b>238.69</b><br>460.07 1089.74 1377.81 3008.27<br>460.84 1106.90 1382.59 3013.67<br>602.27 1120.34 1389.15 3036.33<br>790.22 1145.86 1406.32 3041.12<br>791.27 1148.95 1411.59 3049.67 |

|                         | Cartesian coordinates and rotational constants |             |             | Visual      |         |         |         |         |               |
|-------------------------|------------------------------------------------|-------------|-------------|-------------|---------|---------|---------|---------|---------------|
| ECH                     | C                                              | 2.32508100  | 0.30952900  | -0.22343300 |         |         |         |         |               |
|                         | C                                              | 1.34953600  | 1.41405800  | 0.18533900  |         |         |         |         |               |
|                         | C                                              | -0.07609300 | 1.09937600  | -0.27560000 |         |         |         |         |               |
|                         | C                                              | -0.55919200 | -0.26144900 | 0.23926400  |         |         |         |         |               |
|                         | C                                              | 0.43564500  | -1.35711500 | -0.16047500 |         |         |         |         |               |
|                         | C                                              | 1.85905600  | -1.04736900 | 0.30650600  |         |         |         |         |               |
|                         | H                                              | -0.75190300 | 1.89278100  | 0.05429700  | 131.87  | 904.66  | 1290.47 | 1489.40 | 3075.24       |
|                         | H                                              | 1.35784400  | 1.51224200  | 1.27791200  | 220.16  | 935.87  | 1293.13 | 1491.50 | 3084.24       |
|                         | H                                              | 1.67168800  | 2.37699100  | -0.22032200 | 232.90  | 937.53  | 1310.02 | 1495.07 | 3093.98       |
|                         | H                                              | 2.38249800  | 0.26712600  | -1.31809700 | 334.98  | 1003.91 | 1320.32 | 1503.97 | 3094.64       |
|                         | H                                              | 3.33136400  | 0.53624900  | 0.13921300  | 368.20  | 1033.40 | 1343.39 | 1509.24 | 3097.74       |
|                         | H                                              | -0.58478100 | -0.21417800 | 1.33860200  | 431.25  | 1058.47 | 1366.93 | 1514.88 | 3100.32       |
|                         | H                                              | 0.10392600  | -2.32004700 | 0.24091600  | 445.20  | 1061.16 | 1377.71 | 3001.89 | 3127.73       |
|                         | H                                              | 0.42841300  | -1.45200700 | -1.25491500 | 458.56  | 1081.57 | 1385.14 | 3023.26 | 3138.80       |
|                         | H                                              | 1.88303700  | -1.03230100 | 1.40305300  | 541.56  | 1109.48 | 1387.44 | 3028.72 | <b>83.72</b>  |
|                         | H                                              | 2.54257700  | -1.83823100 | -0.01425400 | 762.65  | 1126.25 | 1394.15 | 3036.60 | <b>246.92</b> |
|                         | H                                              | -0.10992400 | 1.08832500  | -1.37411600 | 797.46  | 1145.71 | 1407.63 | 3039.90 |               |
|                         | C                                              | -1.96739300 | -0.60685200 | -0.25274500 | 805.91  | 1190.12 | 1416.55 | 3041.07 |               |
|                         | H                                              | -2.22363100 | -1.60880700 | 0.10826000  | 858.87  | 1221.27 | 1480.35 | 3045.26 |               |
|                         | H                                              | -1.95132700 | -0.66956200 | -1.34778800 | 890.28  | 1261.17 | 1486.08 | 3058.93 |               |
| C                       | -3.04853900                                    | 0.37824300  | 0.18942400  |             |         |         |         |         |               |
| H                       | -2.91570700                                    | 1.35892900  | -0.27124500 |             |         |         |         |         |               |
| H                       | -4.04204300                                    | 0.01891000  | -0.08592700 |             |         |         |         |         |               |
| H                       | -3.03063300                                    | 0.51305500  | 1.27473400  |             |         |         |         |         |               |
|                         | Rotational constants (GHZ):                    |             |             |             |         |         |         |         |               |
|                         | 3.83148                                        | 1.30334     | 1.05192     |             |         |         |         |         |               |
| TS <sub>2</sub> $\beta$ | C                                              | -2.34214700 | 0.39769400  | 0.24110000  |         |         |         |         |               |
|                         | C                                              | -1.32594100 | 1.43024000  | -0.24904500 | 1361.44 | 821.58  | 1167.56 | 1393.77 | 3037.40       |
|                         | C                                              | 0.09508000  | 1.06801100  | 0.18962600  | 203.58  | 860.92  | 1175.20 | 1412.44 | 3040.75       |
|                         | C                                              | 0.49224500  | -0.33986400 | -0.26822900 | 215.50  | 898.19  | 1195.87 | 1458.37 | 3046.00       |
|                         | C                                              | -0.54087400 | -1.36487200 | 0.21233600  | 237.57  | 906.52  | 1213.92 | 1472.91 | 3052.09       |
|                         | C                                              | -1.95977100 | -1.00571400 | -0.23228600 | 306.47  | 936.33  | 1241.48 | 1481.44 | 3083.50       |
|                         | H                                              | 0.80238500  | 1.80731000  | -0.19593400 | 333.38  | 940.30  | 1285.65 | 1488.03 | 3095.51       |
|                         | H                                              | -1.36153500 | 1.47492000  | -1.34462300 | 372.16  | 998.30  | 1292.49 | 1489.02 | 3096.44       |
|                         | H                                              | -1.58776900 | 2.42688900  | 0.11604300  | 430.71  | 1010.66 | 1304.55 | 1494.12 | 3099.10       |
|                         | H                                              | -2.36929000 | 0.41186900  | 1.33761100  | 445.62  | 1059.16 | 1319.40 | 1508.00 | 3101.36       |
|                         | H                                              | -3.34629400 | 0.65672300  | -0.10525000 | 460.89  | 1066.57 | 1342.64 | 1667.24 | 3104.91       |
|                         | H                                              | 0.49057300  | -0.34875000 | -1.36867600 | 533.78  | 1077.41 | 1368.28 | 3004.88 | 3188.95       |
|                         | H                                              | -0.26895600 | -2.36191500 | -0.14893600 | 574.26  | 1102.73 | 1379.82 | 3018.33 | <b>92.82</b>  |
|                         | H                                              | -0.50715400 | -1.40556500 | 1.30950000  | 777.25  | 1119.30 | 1386.25 | 3024.90 | <b>130.33</b> |
|                         | H                                              | -2.01464300 | -1.04321300 | -1.32716100 | 797.55  | 1143.07 | 1389.06 | 3031.19 |               |
|                         | H                                              | -2.67174000 | -1.74425600 | 0.14589400  |         |         |         |         |               |
|                         | H                                              | 0.16375800  | 1.11261900  | 1.28548400  |         |         |         |         |               |

|                          |                                                                                                                                                                                                                                                                                                                                                                                                                                                                                                                                                                                                                                                                                                                                                                                                                                                                                                                                                                                                                                                                                      |                                                                                                                                                                                                                                                                                                                                                                                                                                                                                                                                                                                                         |
|--------------------------|--------------------------------------------------------------------------------------------------------------------------------------------------------------------------------------------------------------------------------------------------------------------------------------------------------------------------------------------------------------------------------------------------------------------------------------------------------------------------------------------------------------------------------------------------------------------------------------------------------------------------------------------------------------------------------------------------------------------------------------------------------------------------------------------------------------------------------------------------------------------------------------------------------------------------------------------------------------------------------------------------------------------------------------------------------------------------------------|---------------------------------------------------------------------------------------------------------------------------------------------------------------------------------------------------------------------------------------------------------------------------------------------------------------------------------------------------------------------------------------------------------------------------------------------------------------------------------------------------------------------------------------------------------------------------------------------------------|
|                          | C 1.89542100 -0.73044200 0.20273900<br>H 2.10615000 -1.75421100 -0.13465300<br>H 1.90824400 -0.76942200 1.30018100<br>C 2.99465800 0.18229000 -0.28181900<br>H 4.01010400 -0.16959700 -0.10953900<br>H 2.86000000 0.60619500 -1.27712100<br>H 2.98142600 1.28775200 0.51949800<br>H 2.95271100 1.98859400 1.11114500<br>Rotational constants (GHZ):<br>3.64707 1.27778 1.02702                                                                                                                                                                                                                                                                                                                                                                                                                                                                                                                                                                                                                                                                                                       |                                                                                                                                                                                                                                                                                                                                                                                                                                                                                                                                                                                                         |
| TS <sub>2</sub> $\alpha$ | C -2.38217800 -0.24650200 0.19761400<br>C -1.84074000 1.10623500 -0.26873600<br>C -0.41167200 1.32651800 0.22923100<br>C 0.52830400 0.19750700 -0.20810400<br>C -0.02679800 -1.16234800 0.25239300<br>C -1.45842700 -1.38327800 -0.24283400<br>H -0.02387700 2.28546200 -0.12734200<br>H -1.84891700 1.13882000 -1.36499100<br>H -2.48883600 1.91605800 0.07658900<br>H -2.45533800 -0.24629300 1.29213100<br>H -3.39239100 -0.40719700 -0.18824400<br>H 0.56210100 0.18629200 -1.30826900<br>H 0.62005100 -1.97063200 -0.09978700<br>H -0.01011700 -1.19289100 1.35016100<br>H -1.45287100 -1.43753100 -1.33828900<br>H -1.83502700 -2.34370200 0.11961600<br>H -0.41416200 1.37166000 1.32660200<br>C 1.93448700 0.42997100 0.29835300<br>H 1.97198400 0.66950000 1.36474500<br>H 2.27804600 1.58636300 -0.24790500<br>C 3.00845700 -0.53232200 -0.14827500<br>H 2.95690100 -0.69672100 -1.22806200<br>H 4.00333400 -0.15070400 0.09045600<br>H 2.90287400 -1.50482800 0.34328000<br>H 2.51765400 2.38165700 -0.71854800<br>Rotational constants (GHZ):<br>3.64160 1.27611 1.02200 | 1269.29i 831.44 1178.54 1404.89 3042.78<br>125.45 859.62 1203.33 1417.76 3046.83<br>187.42 893.45 1218.08 1480.94 3047.33<br>238.43 906.28 1224.11 1485.06 3089.94<br>280.24 937.92 1263.48 1487.68 3092.15<br>310.20 940.70 1292.03 1490.33 3094.22<br>366.99 1003.44 1299.34 1495.19 3095.99<br>378.60 1034.84 1309.86 1500.09 3097.23<br>433.95 1057.45 1334.81 1509.06 3101.28<br>449.89 1073.43 1365.15 1529.32 3111.56<br>465.56 1079.67 1374.73 3004.50 3132.78<br>540.52 1104.96 1379.17 3028.08 <b>83.68</b><br>791.63 1122.65 1387.16 3033.99 <b>212.27</b><br>800.71 1141.57 1389.09 3038.04 |

|                             |             |             |             |             |                  |         |         |         |               |
|-----------------------------|-------------|-------------|-------------|-------------|------------------|---------|---------|---------|---------------|
| TS <sub>2</sub> α'          | C           | 2.32752400  | 0.32373700  | -0.23860000 |                  |         |         |         |               |
|                             | C           | 1.34416200  | 1.41689300  | 0.17938200  |                  |         |         |         |               |
|                             | C           | -0.07396700 | 1.11408100  | -0.31340300 |                  |         |         |         |               |
|                             | C           | -0.54267700 | -0.27009500 | 0.09315700  |                  |         |         |         |               |
|                             | C           | 0.45910600  | -1.36768500 | -0.21349500 |                  |         |         |         |               |
|                             | C           | 1.86757300  | -1.03689700 | 0.28505400  |                  |         |         |         |               |
|                             | H           | -0.76619000 | 1.87320300  | 0.06019400  | 1297.22 <i>i</i> | 795.39  | 1154.09 | 1415.81 | 3048.69       |
|                             | H           | 1.33120700  | 1.48552700  | 1.27349100  | 125.77           | 858.54  | 1207.46 | 1446.55 | 3050.81       |
|                             | H           | 1.66752000  | 2.39070400  | -0.19718400 | 207.78           | 877.59  | 1218.58 | 1469.17 | 3062.25       |
|                             | H           | 2.39056500  | 0.28960600  | -1.33350600 | 221.50           | 913.81  | 1252.48 | 1475.12 | 3071.04       |
|                             | H           | 3.33010700  | 0.55419200  | 0.13111900  | 271.97           | 936.00  | 1262.85 | 1483.86 | 3080.43       |
|                             | H           | -0.57214000 | -0.22771600 | 1.39577300  | 296.85           | 947.68  | 1288.57 | 1489.69 | 3097.05       |
|                             | H           | 0.11062800  | -2.31214300 | 0.21678300  | 331.65           | 1005.05 | 1301.12 | 1493.08 | 3099.05       |
|                             | H           | 0.48626300  | -1.51197600 | -1.30498500 | 371.77           | 1044.52 | 1318.70 | 1505.21 | 3100.20       |
|                             | H           | 1.86264700  | -1.01635100 | 1.38109000  | 416.99           | 1057.45 | 1355.23 | 1506.98 | 3103.76       |
|                             | H           | 2.56458100  | -1.82269100 | -0.01715600 | 448.34           | 1066.81 | 1367.04 | 1514.61 | 3133.31       |
|                             | H           | -0.10088300 | 1.17726000  | -1.41331500 | 462.63           | 1087.22 | 1380.55 | 2990.51 | 3140.52       |
|                             | C           | -1.96793400 | -0.62753900 | -0.28251800 | 546.92           | 1113.39 | 1383.59 | 2998.48 | <b>87.98</b>  |
|                             | H           | -2.20747500 | -1.59739300 | 0.16667800  | 752.55           | 1130.95 | 1387.51 | 3014.01 | <b>257.90</b> |
|                             | H           | -2.01235900 | -0.77709700 | -1.37110600 | 792.43           | 1144.48 | 1398.79 | 3036.51 |               |
|                             | C           | -3.01545800 | 0.40212600  | 0.13853400  |                  |         |         |         |               |
|                             | H           | -4.02334200 | 0.02323500  | -0.03936600 |                  |         |         |         |               |
|                             | H           | -2.92413400 | 0.63153400  | 1.20367300  |                  |         |         |         |               |
| H                           | -2.91138000 | 1.33539400  | -0.41781300 |             |                  |         |         |         |               |
| H                           | -0.61558300 | -0.22301500 | 2.37695800  |             |                  |         |         |         |               |
| Rotational constants (GHZ): |             |             |             |             |                  |         |         |         |               |
|                             |             | 3.62476     | 1.29146     | 1.05308     |                  |         |         |         |               |
| TS <sub>2</sub> β'          | C           | -2.32281400 | 0.29625000  | 0.19097600  |                  |         |         |         |               |
|                             | C           | -1.36499300 | 1.39599100  | -0.27387500 | 1319.19 <i>i</i> | 813.52  | 1159.48 | 1405.55 | 3046.81       |
|                             | C           | 0.06823400  | 1.08289400  | 0.09517000  | 129.25           | 863.65  | 1202.76 | 1416.93 | 3051.47       |
|                             | C           | 0.56580900  | -0.29874000 | -0.27865900 | 199.00           | 889.62  | 1208.68 | 1475.26 | 3059.32       |
|                             | C           | -0.43497100 | -1.36798200 | 0.17871600  | 223.42           | 903.75  | 1220.68 | 1484.63 | 3082.64       |
|                             | C           | -1.85655400 | -1.07387000 | -0.30218200 | 276.17           | 931.11  | 1259.44 | 1491.69 | 3089.68       |
|                             | H           | 0.76557400  | 1.89119200  | -0.12673400 | 306.69           | 935.72  | 1281.15 | 1493.99 | 3091.27       |
|                             | H           | -1.43399200 | 1.49320700  | -1.36769200 | 338.67           | 1002.33 | 1295.72 | 1503.54 | 3098.32       |
|                             | H           | -1.65658500 | 2.36392100  | 0.14331100  | 371.50           | 1035.43 | 1306.17 | 1504.52 | 3104.13       |
|                             | H           | -2.35515800 | 0.29090000  | 1.28664600  | 449.48           | 1060.13 | 1336.53 | 1515.49 | 3125.08       |
|                             | H           | -3.33617600 | 0.50787400  | -0.15947700 | 452.81           | 1063.79 | 1362.09 | 1552.39 | 3130.20       |
|                             | H           | 0.61708900  | -0.33945400 | -1.38129200 | 498.57           | 1085.88 | 1367.32 | 2956.54 | 3141.11       |
|                             | H           | -0.10462700 | -2.34911000 | -0.17546700 | 573.33           | 1108.15 | 1379.47 | 3005.28 | <b>69.95</b>  |
|                             | H           | -0.42606400 | -1.40505600 | 1.27582200  | 760.86           | 1118.70 | 1386.49 | 3034.65 | <b>241.37</b> |
|                             | H           | -1.88055100 | -1.09262000 | -1.39896600 | 799.22           | 1141.84 | 1389.75 | 3040.37 |               |
|                             | H           | -2.53954400 | -1.85438300 | 0.04325200  |                  |         |         |         |               |
|                             | H           | 0.08046800  | 1.08033900  | 1.44196900  |                  |         |         |         |               |

|                    |                                                                                                                                                                                                                                                                                                                                                                                                                                                                                                                                                                                                                                                                                                                                                                                                                                                                                                                                                                                                                                                                                  |                                                                                                                                                                                                                                                                                                                                                                                                                                                                                                                                                                                                        |
|--------------------|----------------------------------------------------------------------------------------------------------------------------------------------------------------------------------------------------------------------------------------------------------------------------------------------------------------------------------------------------------------------------------------------------------------------------------------------------------------------------------------------------------------------------------------------------------------------------------------------------------------------------------------------------------------------------------------------------------------------------------------------------------------------------------------------------------------------------------------------------------------------------------------------------------------------------------------------------------------------------------------------------------------------------------------------------------------------------------|--------------------------------------------------------------------------------------------------------------------------------------------------------------------------------------------------------------------------------------------------------------------------------------------------------------------------------------------------------------------------------------------------------------------------------------------------------------------------------------------------------------------------------------------------------------------------------------------------------|
|                    | C 1.96726300 -0.59214400 0.26721900<br>H 2.22821100 -1.62116800 -0.00127200<br>H 1.92990200 -0.55716900 1.36213100<br>C 3.05356700 0.35270500 -0.24366500<br>H 4.04186100 0.02066500 0.07992800<br>H 3.05497000 0.39068300 -1.33678200<br>H 2.91481900 1.36985000 0.12756400<br>H 0.04656400 1.03970100 2.38485600<br>Rotational constants (GHZ):<br>3.63355 1.27922 1.04839                                                                                                                                                                                                                                                                                                                                                                                                                                                                                                                                                                                                                                                                                                     |                                                                                                                                                                                                                                                                                                                                                                                                                                                                                                                                                                                                        |
| TS <sub>2</sub> γ' | C 2.31854600 0.24038400 -0.29730900<br>C 1.33934000 1.36312800 -0.04269800<br>C -0.10425400 1.06034500 -0.37737700<br>C -0.57853200 -0.26774700 0.22770400<br>C 0.40269800 -1.38904300 -0.12961100<br>C 1.82789900 -1.06994300 0.32320100<br>H -0.73877200 1.88471300 -0.04048000<br>H 1.34787400 1.52160700 1.28338700<br>H 1.67922600 2.34453600 -0.37573700<br>H 2.42867800 0.10508000 -1.38362900<br>H 3.30740200 0.50495900 0.08730900<br>H -0.57582400 -0.15365100 1.32163600<br>H 0.06428800 -2.32847900 0.31841800<br>H 0.39031600 -1.53527100 -1.21858600<br>H 1.84583800 -0.97614300 1.41511200<br>H 2.50435000 -1.88728600 0.06082500<br>H -0.21633200 1.00446100 -1.47268600<br>C -1.99977100 -0.62758300 -0.21171700<br>H -2.26155200 -1.59567100 0.22838600<br>H -2.00603600 -0.77202600 -1.29921000<br>C -3.05730800 0.40483200 0.17613100<br>H -4.06135400 0.03999600 -0.04870000<br>H -3.01210600 0.62354200 1.24676500<br>H -2.92231800 1.34468700 -0.36277900<br>H 1.33461300 1.58869900 2.23002400<br>Rotational constants (GHZ):<br>3.62329 1.27740 1.04341 | 1303.64i 814.23 1155.48 1409.34 3040.64<br>128.68 858.22 1196.25 1417.02 3051.32<br>196.19 890.91 1220.02 1471.22 3059.19<br>218.83 905.18 1236.46 1476.45 3077.47<br>273.15 927.84 1253.94 1487.46 3086.94<br>290.02 939.16 1277.82 1494.38 3091.80<br>354.96 999.06 1305.22 1500.51 3092.66<br>376.54 1034.45 1320.80 1504.41 3103.20<br>431.56 1058.62 1332.64 1515.71 3121.75<br>461.78 1065.51 1356.00 1539.52 3128.78<br>464.75 1083.95 1374.29 2985.97 3137.52<br>591.64 1116.94 1379.10 3006.56 <b>87.46</b><br>764.44 1126.46 1385.43 3014.94 <b>242.59</b><br>801.49 1146.32 1396.90 3027.32 |

|                             |             |             |             |             |         |         |         |         |               |
|-----------------------------|-------------|-------------|-------------|-------------|---------|---------|---------|---------|---------------|
| TS <sub>2</sub> δ'          | C           | -1.30451700 | 1.42123000  | -0.26132500 |         |         |         |         |               |
|                             | C           | 0.10146400  | 1.09538000  | 0.25264600  |         |         |         |         |               |
|                             | C           | 0.59760200  | -0.26395600 | -0.25215300 |         |         |         |         |               |
|                             | C           | -0.40101200 | -1.35798100 | 0.14069800  |         |         |         |         |               |
|                             | C           | -1.81143900 | -1.07240700 | -0.38101700 |         |         |         |         |               |
|                             | H           | 0.78873200  | 1.89052000  | -0.04637600 |         |         |         |         |               |
|                             | H           | -1.26031700 | 1.57669000  | -1.34966200 | 1309.87 | 813.49  | 1155.81 | 1407.91 | 3037.20       |
|                             | H           | -1.66100600 | 2.35961900  | 0.17249700  | 124.51  | 859.44  | 1208.20 | 1417.03 | 3043.43       |
|                             | H           | -2.35031900 | 0.25430200  | 1.36439300  | 208.88  | 888.79  | 1221.63 | 1472.42 | 3059.16       |
|                             | H           | -3.31557200 | 0.52819500  | -0.23222200 | 217.40  | 915.05  | 1227.69 | 1481.94 | 3077.34       |
|                             | H           | 0.64332800  | -0.22201300 | -1.35133300 | 275.35  | 934.16  | 1241.62 | 1483.75 | 3089.59       |
|                             | H           | -0.05410300 | -2.32815800 | -0.22773500 | 280.71  | 939.27  | 1289.68 | 1491.19 | 3090.19       |
|                             | H           | -0.43141200 | -1.42495900 | 1.23590000  | 343.92  | 995.60  | 1299.53 | 1499.87 | 3090.76       |
|                             | H           | -1.80896200 | -1.13327700 | -1.47951800 | 372.47  | 1032.53 | 1314.64 | 1505.66 | 3105.49       |
|                             | H           | -2.51238500 | -1.83389100 | -0.02793500 | 445.97  | 1057.17 | 1338.84 | 1514.91 | 3122.60       |
|                             | H           | 0.08979200  | 1.07587700  | 1.35058100  | 451.51  | 1062.26 | 1354.67 | 1546.94 | 3128.27       |
|                             | C           | 1.99699900  | -0.60358400 | 0.26865200  | 469.56  | 1088.59 | 1372.14 | 2999.42 | 3139.30       |
|                             | H           | 2.26118600  | -1.60726800 | -0.08137700 | 596.77  | 1112.10 | 1381.39 | 3004.57 | <b>80.61</b>  |
|                             | H           | 1.95995000  | -0.65950400 | 1.36340600  | 762.60  | 1122.65 | 1384.01 | 3007.45 | <b>240.96</b> |
|                             | C           | 3.08478100  | 0.38013100  | -0.16000800 | 790.95  | 1145.70 | 1394.71 | 3035.55 |               |
|                             | H           | 4.07318900  | 0.02260400  | 0.13502100  |         |         |         |         |               |
|                             | H           | 3.08633400  | 0.50871400  | -1.24621500 |         |         |         |         |               |
| H                           | 2.94413400  | 1.36322000  | 0.29307100  |             |         |         |         |         |               |
| H                           | -2.35288500 | 0.20897300  | 2.31029900  |             |         |         |         |         |               |
| Rotational constants (GHZ): |             |             |             |             |         |         |         |         |               |
|                             |             | 3.63801     | 1.27025     | 1.04081     |         |         |         |         |               |

|                          | Cartesian coordinates and rotational constants |             |             | Visual      |         |         |         |         |               |
|--------------------------|------------------------------------------------|-------------|-------------|-------------|---------|---------|---------|---------|---------------|
| <i>n</i> PCH             | C                                              | -2.35998300 | -1.07360400 | -0.28201700 |         |         |         |         |               |
|                          | C                                              | -0.91999100 | -1.35320900 | 0.15152900  |         |         |         |         |               |
|                          | C                                              | 0.04244000  | -0.23657400 | -0.27015500 |         |         |         |         |               |
|                          | C                                              | -0.45785000 | 1.11425200  | 0.25564200  |         |         |         |         |               |
|                          | C                                              | -1.90077600 | 1.39804900  | -0.17031500 |         |         |         |         |               |
|                          | C                                              | -2.84225300 | 0.27260000  | 0.26067700  |         |         |         |         |               |
|                          | H                                              | -0.88556400 | -1.44810400 | 1.24544400  | 129.04  | 913.63  | 1291.02 | 1489.71 | 3083.22       |
|                          | H                                              | -0.57727000 | -2.30879100 | -0.25803000 | 184.25  | 917.77  | 1298.13 | 1494.00 | 3090.69       |
|                          | H                                              | -2.40990300 | -1.05799000 | -1.37770200 | 232.62  | 943.35  | 1307.02 | 1497.55 | 3093.62       |
|                          | H                                              | -3.01893500 | -1.87909600 | 0.05348300  | 295.98  | 989.57  | 1326.19 | 1504.84 | 3094.63       |
|                          | H                                              | -0.39658800 | 1.10505700  | 1.35299800  | 328.72  | 1039.80 | 1339.38 | 1508.38 | 3098.69       |
|                          | H                                              | 0.19262300  | 1.92154900  | -0.09114200 | 358.66  | 1058.48 | 1353.63 | 1512.45 | 3101.84       |
|                          | H                                              | -2.23343100 | 2.35367900  | 0.24410100  | 443.01  | 1060.59 | 1367.91 | 3003.13 | 3126.30       |
|                          | H                                              | -1.93770500 | 1.49675100  | -1.26226300 | 445.61  | 1079.46 | 1382.73 | 3022.18 | 3132.17       |
|                          | H                                              | -2.87213300 | 0.22820900  | 1.35637700  | 472.68  | 1089.62 | 1385.94 | 3022.91 | <b>70.45</b>  |
|                          | H                                              | -3.86163800 | 0.47805100  | -0.07723600 | 571.56  | 1115.07 | 1389.45 | 3031.24 | <b>77.50</b>  |
|                          | H                                              | 0.04214200  | -0.18964400 | -1.36968700 | 741.21  | 1129.32 | 1403.08 | 3036.60 | <b>248.50</b> |
|                          | C                                              | 1.46706500  | -0.55370200 | 0.19102400  | 793.87  | 1143.62 | 1411.68 | 3040.48 |               |
|                          | H                                              | 1.73858000  | -1.55142600 | -0.17583800 | 802.47  | 1190.11 | 1414.05 | 3044.98 |               |
|                          | H                                              | 1.47961200  | -0.61760800 | 1.28746600  | 848.82  | 1218.65 | 1479.15 | 3049.17 |               |
|                          | C                                              | 2.53199100  | 0.44250300  | -0.26679500 | 861.02  | 1247.40 | 1485.50 | 3055.72 |               |
|                          | H                                              | 2.35266600  | 1.41851900  | 0.19291200  | 900.94  | 1284.27 | 1488.33 | 3059.92 |               |
|                          | H                                              | 2.44718700  | 0.58811000  | -1.34979500 |         |         |         |         |               |
|                          | C                                              | 3.94357100  | -0.02506800 | 0.08150000  |         |         |         |         |               |
|                          | H                                              | 4.69707600  | 0.69923100  | -0.23415500 |         |         |         |         |               |
|                          | H                                              | 4.04872600  | -0.16969000 | 1.16008900  |         |         |         |         |               |
| H                        | 4.16926600                                     | -0.97828500 | -0.40355900 |             |         |         |         |         |               |
|                          | Rotational constants (GHZ):                    |             |             |             |         |         |         |         |               |
|                          | 3.74058                                        | 0.77490     | 0.67881     |             |         |         |         |         |               |
| TS <sub>3</sub> $\gamma$ | C                                              | -2.42117400 | -1.07075600 | -0.24919700 | 1443.11 | 857.11  | 1178.38 | 1412.99 | 3040.74       |
|                          | C                                              | -0.96903500 | -1.35384200 | 0.13898700  | 126.04  | 863.39  | 1185.89 | 1461.00 | 3045.63       |
|                          | C                                              | -0.01851200 | -0.23780100 | -0.31047900 | 190.32  | 901.46  | 1214.38 | 1476.59 | 3065.88       |
|                          | C                                              | -0.49968200 | 1.11310100  | 0.23300700  | 233.09  | 912.95  | 1222.92 | 1483.08 | 3082.96       |
|                          | C                                              | -1.95464900 | 1.39980700  | -0.14754900 | 259.30  | 921.01  | 1280.38 | 1486.45 | 3088.08       |
|                          | C                                              | -2.88396600 | 0.27515000  | 0.31083000  | 328.65  | 943.00  | 1287.34 | 1489.62 | 3094.45       |
|                          | H                                              | -0.90057500 | -1.45069200 | 1.23099300  | 333.89  | 989.86  | 1294.11 | 1492.62 | 3095.40       |
|                          | H                                              | -0.64096400 | -2.30917100 | -0.28290900 | 360.77  | 1026.35 | 1308.66 | 1496.36 | 3098.68       |
|                          | H                                              | -2.50540400 | -1.05314400 | -1.34274300 | 443.26  | 1058.18 | 1318.59 | 1509.06 | 3100.67       |
|                          | H                                              | -3.07039100 | -1.87589900 | 0.10535700  | 445.80  | 1060.47 | 1336.57 | 1649.56 | 3107.80       |
|                          | H                                              | -0.40374500 | 1.10203700  | 1.32766800  | 474.82  | 1081.29 | 1354.96 | 3002.55 | 3192.18       |
|                          | H                                              | 0.14005300  | 1.92080000  | -0.13272000 | 549.81  | 1086.05 | 1367.87 | 3011.11 | <b>55.14</b>  |
|                          | H                                              | -2.27224100 | 2.35519000  | 0.27886600  | 584.68  | 1111.23 | 1382.61 | 3024.85 | <b>75.86</b>  |
|                          | H                                              | -2.02558000 | 1.50055900  | -1.23762000 | 746.19  | 1126.74 | 1386.54 | 3028.63 | <b>159.89</b> |
|                          | H                                              | -2.87980900 | 0.22889500  | 1.40679700  | 794.21  | 1138.96 | 1389.60 | 3034.54 |               |
|                          | H                                              | -3.91298100 | 0.48289300  | 0.00522000  |         |         |         |         |               |



|                   |                             |             |             |             |                  |         |         |         |               |
|-------------------|-----------------------------|-------------|-------------|-------------|------------------|---------|---------|---------|---------------|
|                   | H                           | -0.05179700 | -0.18947900 | -1.40950300 | 803.09           | 1159.92 | 1403.47 | 3037.39 |               |
|                   | C                           | 1.41747900  | -0.55957400 | 0.10894100  |                  |         |         |         |               |
|                   | H                           | 1.67761800  | -1.55675900 | -0.26656900 |                  |         |         |         |               |
|                   | H                           | 1.46675700  | -0.62025600 | 1.20374200  |                  |         |         |         |               |
|                   | C                           | 2.46809200  | 0.43677500  | -0.38342000 |                  |         |         |         |               |
|                   | H                           | 2.30431500  | 1.41887300  | 0.07020400  |                  |         |         |         |               |
|                   | H                           | 2.35209500  | 0.57709500  | -1.46786200 |                  |         |         |         |               |
|                   | C                           | 3.87309800  | -0.01690200 | -0.08232500 |                  |         |         |         |               |
|                   | H                           | 4.67125700  | 0.67953900  | -0.33207400 |                  |         |         |         |               |
|                   | H                           | 3.94643100  | -0.05013500 | 1.28219000  |                  |         |         |         |               |
|                   | H                           | 4.10766700  | -1.04595700 | -0.35292300 |                  |         |         |         |               |
|                   | H                           | 3.92738300  | -0.03012500 | 2.20111400  |                  |         |         |         |               |
|                   | Rotational constants (GHZ): |             |             |             |                  |         |         |         |               |
|                   |                             | 3.57915     | 0.75290     | 0.66700     |                  |         |         |         |               |
| TS <sub>3</sub> β | C                           | 1.89107800  | 1.39503700  | -0.25435700 |                  |         |         |         |               |
|                   | C                           | 0.45621500  | 1.09532300  | 0.18638900  |                  |         |         |         |               |
|                   | C                           | -0.00196700 | -0.29532500 | -0.26734800 |                  |         |         |         |               |
|                   | C                           | 0.98762600  | -1.36253000 | 0.21393300  |                  |         |         |         |               |
|                   | C                           | 2.42007400  | -1.06538500 | -0.23323000 |                  |         |         |         |               |
|                   | C                           | 2.86272900  | 0.32109900  | 0.23707000  |                  |         |         |         |               |
|                   | H                           | 0.38994200  | 1.14567000  | 1.28211800  |                  |         |         |         |               |
|                   | H                           | -0.21888100 | 1.86360700  | -0.20025100 | 1285.86 <i>i</i> | 855.46  | 1199.11 | 1415.82 | 3043.22       |
|                   | H                           | 1.92760100  | 1.43569500  | -1.35011100 | 138.45           | 865.55  | 1212.84 | 1471.58 | 3043.77       |
|                   | H                           | 2.19582900  | 2.38040900  | 0.10806900  | 178.92           | 902.13  | 1223.45 | 1481.03 | 3045.90       |
|                   | H                           | 0.95375600  | -1.39915100 | 1.31123400  | 236.81           | 914.54  | 1237.61 | 1487.09 | 3083.02       |
|                   | H                           | 0.67263300  | -2.34788500 | -0.14444100 | 288.66           | 924.01  | 1282.22 | 1488.92 | 3095.26       |
|                   | H                           | 3.10017600  | -1.83316900 | 0.14543900  | 311.29           | 947.73  | 1291.09 | 1489.66 | 3095.98       |
|                   | H                           | 2.47189500  | -1.10720500 | -1.32811600 | 328.51           | 990.66  | 1298.41 | 1494.07 | 3097.05       |
|                   | H                           | 2.89146700  | 0.33619500  | 1.33352000  | 351.66           | 1034.08 | 1305.44 | 1495.24 | 3098.83       |
|                   | H                           | 3.87671700  | 0.53621000  | -0.11073900 | 370.67           | 1057.89 | 1338.86 | 1508.02 | 3101.09       |
|                   | H                           | -0.00208600 | -0.30719700 | -1.36774500 | 441.66           | 1068.53 | 1347.14 | 1545.27 | 3109.50       |
|                   | C                           | -1.41897300 | -0.62401500 | 0.20732300  | 446.85           | 1082.53 | 1368.32 | 3004.61 | 3137.19       |
|                   | H                           | -1.43361000 | -0.66320100 | 1.30579800  | 474.95           | 1095.28 | 1384.33 | 3006.25 | <b>78.78</b>  |
|                   | H                           | -1.67938300 | -1.63760000 | -0.13097900 | 570.65           | 1115.55 | 1386.77 | 3024.94 | <b>89.91</b>  |
|                   | C                           | -2.49120300 | 0.33075800  | -0.26630800 | 786.94           | 1120.19 | 1389.52 | 3030.48 | <b>204.65</b> |
|                   | H                           | -2.30765400 | 0.74525800  | -1.26064400 | 797.37           | 1140.46 | 1401.89 | 3037.14 |               |
|                   | H                           | -2.38265300 | 1.40160300  | 0.50373300  | 813.74           | 1173.69 | 1410.24 | 3040.33 |               |
|                   | C                           | -3.91480000 | -0.11738300 | -0.03993800 |                  |         |         |         |               |
|                   | H                           | -4.62992800 | 0.66555200  | -0.29865900 |                  |         |         |         |               |
|                   | H                           | -4.14488400 | -0.99913700 | -0.64791800 |                  |         |         |         |               |
|                   | H                           | -4.07087400 | -0.38875200 | 1.00770700  |                  |         |         |         |               |
|                   | H                           | -2.35474300 | 2.10762500  | 1.14077800  |                  |         |         |         |               |
|                   | Rotational constants (GHZ): |             |             |             |                  |         |         |         |               |
|                   |                             | 3.56982     | 0.76869     | 0.67023     |                  |         |         |         |               |

|                             |            |             |             |             |         |         |         |         |               |
|-----------------------------|------------|-------------|-------------|-------------|---------|---------|---------|---------|---------------|
| TS <sub>3</sub> α           | C          | -1.97749900 | -1.38110700 | -0.22627900 |         |         |         |         |               |
|                             | C          | -0.53091400 | -1.16901500 | 0.22768200  |         |         |         |         |               |
|                             | C          | 0.01815600  | 0.18976000  | -0.24360800 |         |         |         |         |               |
|                             | C          | -0.90480400 | 1.32141100  | 0.22405500  |         |         |         |         |               |
|                             | C          | -2.34849800 | 1.10960400  | -0.23340400 |         |         |         |         |               |
|                             | C          | -2.88275000 | -0.24180100 | 0.24458000  |         |         |         |         |               |
|                             | H          | -0.48234100 | -1.20397300 | 1.32435000  |         |         |         |         |               |
|                             | H          | 0.10020400  | -1.97971700 | -0.14628600 | 1251.08 | 857.91  | 1199.55 | 1418.65 | 3046.72       |
|                             | H          | -2.00408800 | -1.43154600 | -1.32162600 | 130.15  | 867.05  | 1207.74 | 1481.18 | 3060.59       |
|                             | H          | -2.34782300 | -2.34113100 | 0.14365200  | 159.23  | 903.29  | 1224.55 | 1483.91 | 3066.12       |
|                             | H          | -0.87576800 | 1.36245500  | 1.32122000  | 236.96  | 915.68  | 1247.96 | 1487.25 | 3085.33       |
|                             | H          | -0.52290500 | 2.27988000  | -0.14003200 | 286.64  | 922.23  | 1288.54 | 1489.90 | 3090.55       |
|                             | H          | -2.98238000 | 1.92161900  | 0.13262100  | 296.05  | 944.93  | 1290.44 | 1494.86 | 3093.99       |
|                             | H          | -2.38791800 | 1.14545400  | -1.32888400 | 322.26  | 991.52  | 1299.49 | 1503.72 | 3096.20       |
|                             | H          | -2.92355500 | -0.24462600 | 1.34077500  | 364.11  | 1046.72 | 1304.71 | 1508.41 | 3097.40       |
|                             | H          | -3.90460400 | -0.39655200 | -0.11194000 | 376.64  | 1058.11 | 1336.49 | 1508.72 | 3101.29       |
|                             | H          | 0.02083500  | 0.18342400  | -1.34421000 | 445.76  | 1062.13 | 1346.01 | 1531.39 | 3130.75       |
|                             | C          | 1.43765600  | 0.41895900  | 0.22495300  | 456.40  | 1083.18 | 1366.30 | 3006.34 | 3139.75       |
|                             | H          | 1.50938900  | 0.65157800  | 1.29256400  | 476.79  | 1093.69 | 1374.21 | 3027.59 | <b>67.82</b>  |
|                             | H          | 1.76325000  | 1.57960000  | -0.33514600 | 573.93  | 1112.71 | 1387.12 | 3029.78 | <b>80.49</b>  |
|                             | C          | 2.51563000  | -0.52164800 | -0.25987500 | 763.28  | 1127.33 | 1389.21 | 3033.74 | <b>227.26</b> |
|                             | H          | 2.43967900  | -0.62080800 | -1.34880600 | 797.84  | 1138.25 | 1393.93 | 3038.12 |               |
|                             | H          | 2.34137200  | -1.52331300 | 0.15298600  | 804.38  | 1179.68 | 1413.76 | 3042.45 |               |
|                             | C          | 3.91674200  | -0.05201800 | 0.12827000  |         |         |         |         |               |
|                             | H          | 4.68115300  | -0.74754600 | -0.22228200 |         |         |         |         |               |
|                             | H          | 4.12767300  | 0.93006900  | -0.30109000 |         |         |         |         |               |
| H                           | 4.00926500 | 0.03103700  | 1.21411700  |             |         |         |         |         |               |
| H                           | 1.97624600 | 2.35922400  | -0.84023200 |             |         |         |         |         |               |
| Rotational constants (GHZ): |            |             |             |             |         |         |         |         |               |
|                             |            | 3.56066     | 0.76690     | 0.66821     |         |         |         |         |               |
| TS <sub>3</sub> α'          | C          | -1.88459300 | 1.40056600  | 0.17150100  | 1297.45 | 850.41  | 1206.88 | 1445.86 | 3053.31       |
|                             | C          | -0.45341400 | 1.12849800  | -0.30090400 | 133.24  | 860.76  | 1215.19 | 1468.31 | 3054.79       |
|                             | C          | 0.03875900  | -0.24642000 | 0.11059500  | 166.61  | 898.81  | 1249.37 | 1474.49 | 3057.46       |
|                             | C          | -0.93596000 | -1.36462700 | -0.20960000 | 218.60  | 909.74  | 1256.73 | 1481.50 | 3080.23       |
|                             | C          | -2.35761500 | -1.06360800 | 0.26952600  | 267.64  | 920.86  | 1275.22 | 1489.70 | 3091.79       |
|                             | C          | -2.83855500 | 0.28716100  | -0.26082300 | 291.22  | 942.79  | 1296.79 | 1492.97 | 3098.22       |
|                             | H          | -0.41122700 | 1.19435600  | -1.40015000 | 301.68  | 989.72  | 1311.78 | 1497.19 | 3099.82       |
|                             | H          | 0.21738800  | 1.90104300  | 0.08416200  | 325.51  | 1048.85 | 1323.91 | 1505.55 | 3102.09       |
|                             | H          | -1.88876100 | 1.46875300  | 1.26572300  | 364.35  | 1060.18 | 1333.39 | 1506.73 | 3103.62       |
|                             | H          | -2.22295400 | 2.36764300  | -0.20926400 | 421.47  | 1066.80 | 1360.52 | 1511.68 | 3127.40       |
|                             | H          | -0.94516200 | -1.50910900 | -1.30134800 | 449.39  | 1084.54 | 1368.53 | 2990.59 | 3134.51       |
|                             | H          | -0.57363900 | -2.30170600 | 0.22529000  | 473.71  | 1093.54 | 1383.05 | 2997.04 | <b>72.15</b>  |
|                             | H          | -3.03386700 | -1.86372200 | -0.04215400 | 581.04  | 1119.68 | 1387.50 | 3002.79 | <b>81.79</b>  |
|                             | H          | -2.36826500 | -1.04301000 | 1.36553200  | 740.23  | 1134.01 | 1396.96 | 3036.55 | <b>248.47</b> |
|                             | H          | -2.88472100 | 0.25200700  | -1.35654000 | 784.12  | 1147.50 | 1407.19 | 3048.48 |               |
|                             | H          | -3.85105000 | 0.49652400  | 0.09414400  |         |         |         |         |               |

|                    |                             |                             |             |             |                  |         |         |         |               |
|--------------------|-----------------------------|-----------------------------|-------------|-------------|------------------|---------|---------|---------|---------------|
|                    | H                           | 0.04935100                  | -0.20483700 | 1.41288700  | 794.35           | 1151.96 | 1415.03 | 3050.65 |               |
|                    | C                           | 1.47498700                  | -0.57517700 | -0.24592700 |                  |         |         |         |               |
|                    | H                           | 1.54094300                  | -0.72911500 | -1.33417900 |                  |         |         |         |               |
|                    | H                           | 1.73243900                  | -1.53884300 | 0.21085100  |                  |         |         |         |               |
|                    | C                           | 2.50859800                  | 0.46816300  | 0.17858100  |                  |         |         |         |               |
|                    | H                           | 2.35646200                  | 0.71265400  | 1.23569900  |                  |         |         |         |               |
|                    | H                           | 2.35497600                  | 1.39402100  | -0.38284600 |                  |         |         |         |               |
|                    | C                           | 3.93723000                  | -0.02378900 | -0.04055700 |                  |         |         |         |               |
|                    | H                           | 4.66983500                  | 0.73322600  | 0.24537100  |                  |         |         |         |               |
|                    | H                           | 4.13448900                  | -0.92231000 | 0.54955200  |                  |         |         |         |               |
|                    | H                           | 4.10550400                  | -0.27332200 | -1.09167800 |                  |         |         |         |               |
|                    | H                           | 0.08163400                  | -0.19886200 | 2.39459200  |                  |         |         |         |               |
|                    | Rotational constants (GHZ): |                             |             |             |                  |         |         |         |               |
|                    |                             | 3.54924                     | 0.77204     | 0.68006     |                  |         |         |         |               |
| TS <sub>3</sub> β' | C                           | -2.36708400                 | -1.03393900 | -0.35844400 |                  |         |         |         |               |
|                    | C                           | -0.91185200                 | -1.31172700 | -0.05889000 |                  |         |         |         |               |
|                    | C                           | 0.06171800                  | -0.18786800 | -0.35106400 |                  |         |         |         |               |
|                    | C                           | -0.43963100                 | 1.12637600  | 0.26310400  |                  |         |         |         |               |
|                    | C                           | -1.88678700                 | 1.42811900  | -0.13298900 |                  |         |         |         |               |
|                    | C                           | -2.82085400                 | 0.28664700  | 0.26930000  |                  |         |         |         |               |
|                    | H                           | -0.86756500                 | -1.44339200 | 1.27850600  |                  |         |         |         |               |
|                    | H                           | -0.56102400                 | -2.29381900 | -0.38262400 | 1305.28 <i>i</i> | 853.57  | 1203.69 | 1414.99 | 3051.83       |
|                    | H                           | -2.50140200                 | -0.97898600 | -1.44904600 | 130.33           | 865.73  | 1211.78 | 1476.98 | 3056.85       |
|                    | H                           | -2.98908600                 | -1.86250000 | -0.00847100 | 175.75           | 899.95  | 1221.55 | 1486.93 | 3066.40       |
|                    | H                           | -0.36889900                 | 1.04818800  | 1.35630400  | 208.51           | 911.67  | 1250.49 | 1487.10 | 3088.98       |
|                    | H                           | 0.20795700                  | 1.95210400  | -0.04174500 | 284.75           | 919.52  | 1268.03 | 1491.93 | 3093.05       |
|                    | H                           | -2.21254300                 | 2.36461000  | 0.32735200  | 294.05           | 941.79  | 1286.70 | 1497.82 | 3097.59       |
|                    | H                           | -1.94023800                 | 1.57343000  | -1.21931600 | 317.45           | 987.55  | 1307.90 | 1503.76 | 3103.54       |
|                    | H                           | -2.81308400                 | 0.18357700  | 1.36055400  | 333.38           | 1038.84 | 1324.20 | 1505.84 | 3106.68       |
|                    | H                           | -3.84951300                 | 0.50963000  | -0.02504600 | 356.64           | 1059.25 | 1333.00 | 1512.65 | 3109.60       |
|                    | H                           | 0.08734000                  | -0.05263000 | -1.44688700 | 451.83           | 1064.00 | 1348.23 | 1551.74 | 3127.50       |
|                    | C                           | 1.47442400                  | -0.55842100 | 0.11066700  | 474.65           | 1077.58 | 1359.54 | 2959.52 | 3133.93       |
|                    | H                           | 1.74788700                  | -1.51997000 | -0.34097700 | 514.81           | 1093.55 | 1367.93 | 3006.72 | <b>72.29</b>  |
|                    | H                           | 1.45994000                  | -0.72100800 | 1.19600900  | 590.88           | 1115.40 | 1381.76 | 3029.86 | <b>79.81</b>  |
|                    | C                           | 2.54980100                  | 0.47086500  | -0.23398300 | 743.76           | 1122.95 | 1388.27 | 3032.65 | <b>251.36</b> |
|                    | H                           | 2.36467200                  | 1.39990700  | 0.31256200  | 797.82           | 1145.63 | 1402.81 | 3040.40 |               |
|                    | H                           | 2.48547500                  | 0.71801900  | -1.29998100 | 806.41           | 1162.38 | 1409.88 | 3048.41 |               |
|                    | C                           | 3.95277900                  | -0.03484500 | 0.09480200  |                  |         |         |         |               |
|                    | H                           | 4.71404100                  | 0.71262700  | -0.13670800 |                  |         |         |         |               |
|                    | H                           | 4.03653300                  | -0.28147000 | 1.15650400  |                  |         |         |         |               |
|                    | H                           | 4.18469900                  | -0.93873800 | -0.47435900 |                  |         |         |         |               |
|                    | H                           | -0.86027600                 | -1.48082800 | 2.22235200  |                  |         |         |         |               |
|                    |                             | Rotational constants (GHZ): |             |             |                  |         |         |         |               |
|                    |                             |                             | 3.54924     | 0.76704     | 0.67633          |         |         |         |               |

|                             |             |             |             |             |         |         |         |               |               |
|-----------------------------|-------------|-------------|-------------|-------------|---------|---------|---------|---------------|---------------|
| TS <sub>3</sub> γ'          | C           | -1.87657500 | 1.34897400  | -0.05280200 |         |         |         |               |               |
|                             | C           | -0.42170100 | 1.07419000  | -0.36168400 |         |         |         |               |               |
|                             | C           | 0.06749200  | -0.24550100 | 0.25041100  |         |         |         |               |               |
|                             | C           | -0.88650600 | -1.38492300 | -0.12397800 |         |         |         |               |               |
|                             | C           | -2.32490100 | -1.09307400 | 0.30440900  |         |         |         |               |               |
|                             | C           | -2.82953600 | 0.20789100  | -0.32457500 |         |         |         |               |               |
|                             | H           | -0.28859300 | 1.02210200  | -1.45481900 |         |         |         |               |               |
|                             | H           | 0.19086000  | 1.90994500  | -0.01240900 | 1303.48 | 848.95  | 1196.76 | 1414.59       | 3051.24       |
|                             | H           | -1.91164900 | 1.50719700  | 1.27275900  | 128.06  | 861.72  | 1220.29 | 1471.70       | 3056.30       |
|                             | H           | -2.22903100 | 2.32382000  | -0.39203600 | 180.57  | 900.40  | 1230.37 | 1476.07       | 3061.70       |
|                             | H           | -0.85274700 | -1.52998000 | -1.21264100 | 196.28  | 913.48  | 1247.34 | 1484.63       | 3085.48       |
|                             | H           | -0.53806200 | -2.31813100 | 0.32926100  | 263.39  | 917.45  | 1269.89 | 1492.11       | 3089.19       |
|                             | H           | -2.98123500 | -1.92294700 | 0.03047600  | 285.45  | 938.24  | 1296.62 | 1497.29       | 3091.63       |
|                             | H           | -2.36335700 | -0.99995600 | 1.39585100  | 307.20  | 987.53  | 1301.71 | 1500.43       | 3097.76       |
|                             | H           | -2.91795100 | 0.07087800  | -1.41265800 | 347.50  | 1038.60 | 1322.25 | 1505.55       | 3102.92       |
|                             | H           | -3.82986000 | 0.45348400  | 0.04260000  | 365.77  | 1060.45 | 1338.92 | 1512.27       | 3120.74       |
|                             | H           | 0.04391600  | -0.13294300 | 1.34412100  | 437.93  | 1064.09 | 1339.54 | 1539.29       | 3126.73       |
|                             | C           | 1.50136600  | -0.57964200 | -0.16564600 | 462.68  | 1078.31 | 1363.80 | 2986.59       | 3133.00       |
|                             | H           | 1.53153800  | -0.72637600 | -1.25383700 | 497.85  | 1095.09 | 1375.13 | 3006.78       | <b>72.14</b>  |
|                             | H           | 1.77709200  | -1.54309700 | 0.28039400  | 609.08  | 1120.00 | 1384.31 | 3015.23       | <b>79.35</b>  |
| C                           | 2.54705500  | 0.46214700  | 0.23100100  | 742.55      | 1129.12 | 1390.54 | 3022.67 | <b>250.39</b> |               |
| H                           | 2.43958600  | 0.69277400  | 1.29696900  | 797.22      | 1145.99 | 1403.41 | 3031.39 |               |               |
| H                           | 2.36658400  | 1.39628600  | -0.30876600 | 811.72      | 1155.84 | 1412.74 | 3050.36 |               |               |
| C                           | 3.96954800  | -0.01519700 | -0.05340600 |             |         |         |         |               |               |
| H                           | 4.70913600  | 0.74120900  | 0.21621400  |             |         |         |         |               |               |
| H                           | 4.19594800  | -0.92323500 | 0.51134600  |             |         |         |         |               |               |
| H                           | 4.09644300  | -0.24505500 | -1.11471700 |             |         |         |         |               |               |
| H                           | -1.91607500 | 1.57484200  | 2.21951400  |             |         |         |         |               |               |
| Rotational constants (GHZ): |             |             |             |             |         |         |         |               |               |
|                             | 3.54495     | 0.76394     | 0.67381     |             |         |         |         |               |               |
| TS <sub>3</sub> δ'          | C           | -2.31260600 | -1.09633000 | -0.35143400 | 1307.15 | 855.07  | 1205.63 | 1414.36       | 3049.24       |
|                             | C           | -0.88229000 | -1.35351700 | 0.12884700  | 126.83  | 861.03  | 1219.64 | 1472.39       | 3056.31       |
|                             | C           | 0.08256700  | -0.23896300 | -0.29075200 | 170.79  | 904.56  | 1226.91 | 1481.60       | 3061.73       |
|                             | C           | -0.42694000 | 1.11003900  | 0.22919500  | 218.81  | 910.75  | 1235.00 | 1482.35       | 3089.06       |
|                             | C           | -1.85403900 | 1.40681400  | -0.24245200 | 263.62  | 921.44  | 1275.11 | 1489.10       | 3089.93       |
|                             | C           | -2.79771600 | 0.27006600  | 0.07474500  | 279.55  | 946.12  | 1291.31 | 1496.06       | 3090.60       |
|                             | H           | -0.87984900 | -1.42205500 | 1.22436100  | 296.88  | 984.04  | 1306.00 | 1501.13       | 3093.39       |
|                             | H           | -0.52642000 | -2.31605500 | -0.25081200 | 352.13  | 1036.65 | 1322.64 | 1504.91       | 3107.51       |
|                             | H           | -2.34064300 | -1.15520400 | -1.44970600 | 352.94  | 1057.31 | 1334.29 | 1512.47       | 3123.26       |
|                             | H           | -2.98730900 | -1.87265100 | 0.01998000  | 445.52  | 1062.65 | 1349.58 | 1547.90       | 3127.08       |
|                             | H           | -0.40538800 | 1.09042300  | 1.32698500  | 454.31  | 1084.57 | 1357.12 | 3001.18       | 3132.82       |
|                             | H           | 0.23461000  | 1.91910300  | -0.08979500 | 512.13  | 1090.29 | 1377.84 | 3004.06       | <b>69.17</b>  |
|                             | H           | -2.21660900 | 2.33738900  | 0.20301600  | 607.55  | 1117.61 | 1383.50 | 3007.03       | <b>74.50</b>  |
|                             | H           | -1.84527800 | 1.56397900  | -1.33142800 | 741.24  | 1126.38 | 1389.35 | 3025.07       | <b>247.44</b> |
|                             | H           | -2.82633200 | 0.21721200  | 1.41198200  | 789.53  | 1145.12 | 1404.00 | 3035.79       |               |
|                             | H           | -3.84453200 | 0.47268600  | -0.15463200 |         |         |         |               |               |

|                             |             |             |             |        |         |         |         |
|-----------------------------|-------------|-------------|-------------|--------|---------|---------|---------|
| H                           | 0.09606100  | -0.19605800 | -1.39063500 | 804.92 | 1156.72 | 1412.58 | 3040.99 |
| C                           | 1.50141000  | -0.55208700 | 0.19073700  |        |         |         |         |
| H                           | 1.77847600  | -1.55089800 | -0.16860400 |        |         |         |         |
| H                           | 1.49913900  | -0.61149600 | 1.28733200  |        |         |         |         |
| C                           | 2.57121600  | 0.44307500  | -0.25791300 |        |         |         |         |
| H                           | 2.38732000  | 1.42042100  | 0.19705700  |        |         |         |         |
| H                           | 2.49908300  | 0.58542600  | -1.34227600 |        |         |         |         |
| C                           | 3.97848400  | -0.02396200 | 0.10808400  |        |         |         |         |
| H                           | 4.73554100  | 0.69959200  | -0.20050100 |        |         |         |         |
| H                           | 4.07090700  | -0.16593000 | 1.18813000  |        |         |         |         |
| H                           | 4.20971600  | -0.97828400 | -0.37210800 |        |         |         |         |
| H                           | -2.79899800 | 0.17160000  | 2.35731200  |        |         |         |         |
| Rotational constants (GHZ): |             |             |             |        |         |         |         |
|                             | 3.55501     | 0.76061     | 0.67227     |        |         |         |         |

|                             | Cartesian coordinates and rotational constants |             |             | Visual |         |         |         |               |
|-----------------------------|------------------------------------------------|-------------|-------------|--------|---------|---------|---------|---------------|
| C                           | -1.92673200                                    | 1.25261900  | 0.25417900  |        |         |         |         |               |
| C                           | -0.47345500                                    | 1.25635600  | -0.22548000 |        |         |         |         |               |
| C                           | 0.29723400                                     | -0.00009300 | 0.20702100  |        |         |         |         |               |
| C                           | -0.47357200                                    | -1.25636100 | -0.22579700 |        |         |         |         |               |
| C                           | -1.92682400                                    | -1.25263400 | 0.25392800  |        |         |         |         |               |
| C                           | -2.66561700                                    | 0.00006700  | -0.21310600 |        |         |         |         |               |
| H                           | -0.45416200                                    | 1.31600400  | -1.32284900 |        |         |         |         |               |
| H                           | 0.02344600                                     | 2.15369300  | 0.14907400  | 110.65 | 901.34  | 1224.39 | 1480.73 | 3045.30       |
| H                           | -1.94158400                                    | 1.28802700  | 1.35056400  | 179.97 | 908.78  | 1262.42 | 1486.74 | 3048.62       |
| H                           | -2.43679600                                    | 2.15370300  | -0.09736300 | 227.49 | 929.76  | 1293.64 | 1488.18 | 3052.66       |
| H                           | -0.45435400                                    | -1.31566800 | -1.32318400 | 312.52 | 942.72  | 1301.38 | 1490.45 | 3092.89       |
| H                           | 0.02327400                                     | -2.15385700 | 0.14844700  | 353.03 | 968.00  | 1312.57 | 1493.68 | 3094.34       |
| H                           | -2.43696600                                    | -2.15361300 | -0.09776700 | 398.38 | 977.08  | 1338.77 | 1506.21 | 3098.18       |
| H                           | -1.94163800                                    | -1.28824500 | 1.35030700  | 409.04 | 1017.42 | 1350.95 | 1506.29 | 3107.35       |
| H                           | -2.72103500                                    | 0.00017400  | -1.30869700 | 443.50 | 1067.57 | 1369.92 | 1509.32 | 3109.64       |
| H                           | -3.69392300                                    | 0.00007200  | 0.15851100  | 446.71 | 1071.92 | 1371.32 | 1527.28 | 3115.47       |
| H                           | 0.35066800                                     | -0.00022700 | 1.30764000  | 497.28 | 1098.19 | 1380.89 | 2991.85 | 3122.19       |
| C                           | 1.74483200                                     | -0.00012200 | -0.32455400 | 538.76 | 1116.15 | 1389.82 | 3020.40 | 3145.44       |
| H                           | 1.68958200                                     | -0.00044400 | -1.42201600 | 794.52 | 1126.53 | 1391.10 | 3021.50 | 3146.56       |
| C                           | 2.51675500                                     | 1.24866800  | 0.11312200  | 796.00 | 1154.74 | 1403.89 | 3030.29 | <b>50.84</b>  |
| H                           | 3.56286700                                     | 1.17921400  | -0.19395600 | 856.42 | 1190.67 | 1408.41 | 3036.76 | <b>229.28</b> |
| H                           | 2.10911800                                     | 2.16396000  | -0.31713400 | 876.38 | 1199.23 | 1421.34 | 3040.47 | <b>264.28</b> |
| H                           | 2.49576400                                     | 1.34727100  | 1.20389000  |        |         |         |         |               |
| C                           | 2.51693000                                     | -1.24854600 | 0.11385300  |        |         |         |         |               |
| H                           | 2.10920500                                     | -2.16419700 | -0.31555400 |        |         |         |         |               |
| H                           | 3.56294600                                     | -1.17930000 | -0.19359900 |        |         |         |         |               |
| H                           | 2.49627600                                     | -1.34628400 | 1.20470300  |        |         |         |         |               |
| Rotational constants (GHZ): |                                                |             |             |        |         |         |         |               |
|                             | 3.54495                                        | 0.76394     | 0.67381     |        |         |         |         |               |

|                             |         |             |             |             |         |         |         |         |               |
|-----------------------------|---------|-------------|-------------|-------------|---------|---------|---------|---------|---------------|
| TS <sub>4</sub> $\beta$     | C       | -1.98175100 | 1.23280600  | 0.27857900  |         |         |         |         |               |
|                             | C       | -0.54094400 | 1.27736200  | -0.23483000 |         |         |         |         |               |
|                             | C       | 0.26834900  | 0.03653600  | 0.16980200  |         |         |         |         |               |
|                             | C       | -0.47452100 | -1.23510900 | -0.26379100 |         |         |         |         |               |
|                             | C       | -1.91819600 | -1.27193700 | 0.24375900  |         |         |         |         |               |
|                             | C       | -2.69813600 | -0.03234800 | -0.19022100 |         |         |         |         |               |
|                             | H       | -0.55129800 | 1.34326100  | -1.33181500 | 1351.85 | 857.18  | 1169.41 | 1412.54 | 3046.53       |
|                             | H       | -0.05710900 | 2.18477400  | 0.13243900  | 108.50  | 877.44  | 1180.18 | 1467.67 | 3056.55       |
|                             | H       | -1.97293900 | 1.25415300  | 1.37521900  | 125.90  | 900.98  | 1202.10 | 1482.62 | 3094.40       |
|                             | H       | -2.52152600 | 2.12492300  | -0.05052100 | 229.04  | 909.01  | 1221.25 | 1487.50 | 3095.37       |
|                             | H       | -0.47239900 | -1.28762700 | -1.36191200 | 270.95  | 927.00  | 1252.90 | 1489.90 | 3099.26       |
|                             | H       | 0.05062000  | -2.12132800 | 0.09953800  | 330.52  | 941.99  | 1293.12 | 1494.33 | 3106.15       |
|                             | H       | -2.41253500 | -2.18089200 | -0.10969300 | 348.89  | 961.49  | 1299.69 | 1499.99 | 3109.79       |
|                             | H       | -1.90845600 | -1.32275200 | 1.33943500  | 397.64  | 976.16  | 1308.27 | 1508.73 | 3119.18       |
|                             | H       | -2.77782900 | -0.01864200 | -1.28424800 | 429.52  | 1010.44 | 1325.47 | 1516.55 | 3124.96       |
|                             | H       | -3.71760400 | -0.06430300 | 0.20350900  | 442.77  | 1065.51 | 1341.97 | 1661.88 | 3153.53       |
|                             | H       | 0.34544700  | 0.02157900  | 1.26760900  | 445.35  | 1072.34 | 1357.95 | 2973.59 | 3200.43       |
|                             | C       | 1.70726500  | 0.09555200  | -0.39135900 | 520.14  | 1095.81 | 1369.73 | 3008.50 | <b>36.57</b>  |
|                             | H       | 1.61784700  | 0.22381800  | -1.48307100 | 543.45  | 1103.41 | 1382.22 | 3020.91 | <b>195.04</b> |
|                             | C       | 2.49553500  | 1.28406600  | 0.16856900  | 563.15  | 1125.52 | 1389.68 | 3029.94 | <b>125.90</b> |
|                             | H       | 3.51810400  | 1.28123700  | -0.21551500 | 794.72  | 1139.14 | 1391.39 | 3037.47 |               |
|                             | H       | 2.04768700  | 2.24160700  | -0.09688400 | 797.96  | 1159.55 | 1405.68 | 3042.35 |               |
|                             | H       | 2.54684400  | 1.22017600  | 1.26017500  |         |         |         |         |               |
|                             | C       | 2.48309300  | -1.17923600 | -0.14735200 |         |         |         |         |               |
|                             | H       | 2.08919300  | -2.09302400 | -0.58555400 |         |         |         |         |               |
|                             | H       | 3.56294300  | -1.09542200 | -0.26072400 |         |         |         |         |               |
|                             | H       | 2.35235100  | -1.42188500 | 1.20154300  |         |         |         |         |               |
|                             | H       | 2.21650000  | -1.53580500 | 2.10152700  |         |         |         |         |               |
| Rotational constants (GHZ): |         |             |             |             |         |         |         |         |               |
|                             | 2.75931 | 1.02647     | 0.81354     |             |         |         |         |         |               |
| TS <sub>4</sub> $\alpha$    | C       | -1.95667800 | -1.25262700 | -0.24808800 | 1296.90 | 851.36  | 1182.48 | 1431.03 | 3040.43       |
|                             | C       | -0.48568500 | -1.26031400 | 0.17251700  | 110.33  | 874.07  | 1212.51 | 1477.21 | 3046.84       |
|                             | C       | 0.26409200  | 0.00006000  | -0.28681700 | 226.92  | 901.37  | 1241.88 | 1483.82 | 3094.98       |
|                             | C       | -0.48574500 | 1.26032200  | 0.17273700  | 255.66  | 910.44  | 1271.94 | 1487.86 | 3096.64       |
|                             | C       | -1.95672700 | 1.25264500  | -0.24790200 | 292.36  | 942.10  | 1287.03 | 1488.04 | 3099.99       |
|                             | C       | -2.67372400 | -0.00004200 | 0.25213200  | 294.72  | 942.83  | 1295.72 | 1493.94 | 3104.80       |
|                             | H       | -0.41857500 | -1.32400900 | 1.26703700  | 316.54  | 972.39  | 1304.24 | 1498.79 | 3106.49       |
|                             | H       | -0.00304300 | -2.15391800 | -0.22922900 | 352.35  | 990.53  | 1331.35 | 1500.29 | 3112.50       |
|                             | H       | -2.01716700 | -1.28597900 | -1.34306900 | 391.75  | 1018.26 | 1338.56 | 1508.42 | 3116.70       |
|                             | H       | -2.45216300 | -2.15378900 | 0.12297400  | 411.66  | 1066.58 | 1367.14 | 1524.22 | 3144.19       |
|                             | H       | -0.41867100 | 1.32381400  | 1.26726900  | 444.41  | 1073.25 | 1375.11 | 2955.38 | 3145.98       |
|                             | H       | -0.00313500 | 2.15402400  | -0.22882600 | 452.15  | 1096.09 | 1389.31 | 3029.61 | <b>64.39</b>  |
|                             | H       | -2.45225500 | 2.15373300  | 0.12328300  | 494.73  | 1100.74 | 1390.68 | 3030.64 | <b>150.72</b> |
|                             | H       | -2.01719900 | 1.28615000  | -1.34287900 | 539.76  | 1130.14 | 1399.75 | 3033.22 | <b>187.73</b> |
|                             | H       | -2.67980400 | -0.00012100 | 1.34892500  | 788.58  | 1153.21 | 1404.41 | 3033.79 |               |
|                             | H       | -3.71733800 | -0.00004000 | -0.07366500 |         |         |         |         |               |

|                    |                             |             |             |             |         |         |         |                       |
|--------------------|-----------------------------|-------------|-------------|-------------|---------|---------|---------|-----------------------|
|                    | H                           | 0.27224900  | 0.00016400  | -1.39205300 | 796.80  | 1162.35 | 1414.49 | 3038.68               |
|                    | C                           | 1.72311300  | 0.00004800  | 0.16549700  |         |         |         |                       |
|                    | H                           | 1.62964600  | 0.00023400  | 1.46272900  |         |         |         |                       |
|                    | C                           | 2.49687800  | -1.26393600 | -0.15311300 |         |         |         |                       |
|                    | H                           | 3.53796700  | -1.16805600 | 0.16132200  |         |         |         |                       |
|                    | H                           | 2.07856900  | -2.14089800 | 0.34271200  |         |         |         |                       |
|                    | H                           | 2.48953200  | -1.45409000 | -1.23418100 |         |         |         |                       |
|                    | C                           | 2.49702200  | 1.26383400  | -0.15353100 |         |         |         |                       |
|                    | H                           | 2.07860200  | 2.14108300  | 0.34168600  |         |         |         |                       |
|                    | H                           | 3.53800900  | 1.16807900  | 0.16128100  |         |         |         |                       |
|                    | H                           | 2.49002900  | 1.45339600  | -1.23470600 |         |         |         |                       |
|                    | H                           | 1.52947200  | 0.00028700  | 2.43880600  |         |         |         |                       |
|                    | Rotational constants (GHZ): |             |             |             |         |         |         |                       |
|                    |                             | 2.76110     | 1.03172     | 0.81687     |         |         |         |                       |
|                    | C                           | 1.92389900  | -1.24985600 | 0.24450100  |         |         |         |                       |
|                    | C                           | 0.48266700  | -1.27021400 | -0.27098700 |         |         |         |                       |
|                    | C                           | -0.28571900 | 0.00000500  | 0.05452700  |         |         |         |                       |
|                    | C                           | 0.48267500  | 1.27021200  | -0.27101500 |         |         |         |                       |
|                    | C                           | 1.92390600  | 1.24985900  | 0.24447500  |         |         |         |                       |
|                    | C                           | 2.66699700  | -0.00000600 | -0.22142400 |         |         |         |                       |
|                    | H                           | 0.48894600  | -1.39572600 | -1.36590800 | 1259.59 | 857.59  | 1183.83 | 1464.84 3055.01       |
|                    | H                           | -0.03448300 | -2.14010900 | 0.13947900  | 99.69   | 873.27  | 1206.42 | 1471.07 3058.15       |
|                    | H                           | 1.90831200  | -1.26716300 | 1.34067000  | 186.11  | 892.54  | 1222.04 | 1478.84 3098.06       |
|                    | H                           | 2.44330200  | -2.15489200 | -0.08098700 | 214.77  | 919.95  | 1257.03 | 1489.23 3098.79       |
|                    | H                           | 0.48895700  | 1.39569700  | -1.36594000 | 287.76  | 929.63  | 1267.01 | 1491.64 3102.42       |
|                    | H                           | -0.03447100 | 2.14012100  | 0.13942700  | 291.73  | 941.73  | 1305.49 | 1493.27 3106.77       |
|                    | H                           | 2.44331300  | 2.15488500  | -0.08103100 | 308.70  | 975.79  | 1305.53 | 1506.50 3107.71       |
|                    | H                           | 1.90831800  | 1.26718800  | 1.34064400  | 358.66  | 979.69  | 1340.13 | 1507.19 3123.88       |
|                    | H                           | 2.73306000  | -0.00001700 | -1.31666900 | 387.22  | 1028.07 | 1343.93 | 1509.42 3129.72       |
|                    | H                           | 3.69116000  | -0.00000500 | 0.16074700  | 414.46  | 1068.59 | 1359.44 | 1528.49 3146.82       |
|                    | H                           | -0.35851400 | 0.00001400  | 1.36805900  | 446.09  | 1082.59 | 1370.53 | 2982.13 3148.06       |
|                    | C                           | -1.75112700 | 0.00000800  | -0.37906500 | 448.78  | 1100.06 | 1386.54 | 2990.04 <b>60.25</b>  |
|                    | C                           | -2.49792000 | -1.25167400 | 0.09472200  | 503.89  | 1116.00 | 1391.00 | 2994.68 <b>236.05</b> |
|                    | H                           | -3.55789900 | -1.17694200 | -0.15695600 | 546.94  | 1133.63 | 1402.47 | 3036.78 <b>266.89</b> |
|                    | H                           | -2.11522300 | -2.16382100 | -0.36418000 | 773.03  | 1150.24 | 1403.05 | 3047.87               |
|                    | H                           | -2.41633000 | -1.35432600 | 1.18157300  | 792.02  | 1157.48 | 1419.69 | 3050.29               |
|                    | C                           | -2.49793000 | 1.25166700  | 0.09476800  |         |         |         |                       |
|                    | H                           | -2.11522500 | 2.16383600  | -0.36408000 |         |         |         |                       |
|                    | H                           | -3.55790300 | 1.17694600  | -0.15693600 |         |         |         |                       |
|                    | H                           | -2.41636200 | 1.35426600  | 1.18162600  |         |         |         |                       |
|                    | H                           | -0.42992800 | 0.00001400  | 2.33876100  |         |         |         |                       |
|                    | Rotational constants (GHZ): |             |             |             |         |         |         |                       |
|                    |                             | 2.75931     | 1.04041     | 0.82365     |         |         |         |                       |
| TS <sub>4</sub> α' | C                           | 1.92389900  | -1.24985600 | 0.24450100  |         |         |         |                       |
|                    | C                           | 0.48266700  | -1.27021400 | -0.27098700 |         |         |         |                       |
|                    | C                           | -0.28571900 | 0.00000500  | 0.05452700  |         |         |         |                       |
|                    | C                           | 0.48267500  | 1.27021200  | -0.27101500 |         |         |         |                       |
|                    | C                           | 1.92390600  | 1.24985900  | 0.24447500  |         |         |         |                       |
|                    | C                           | 2.66699700  | -0.00000600 | -0.22142400 |         |         |         |                       |
|                    | H                           | 0.48894600  | -1.39572600 | -1.36590800 | 1259.59 | 857.59  | 1183.83 | 1464.84 3055.01       |
|                    | H                           | -0.03448300 | -2.14010900 | 0.13947900  | 99.69   | 873.27  | 1206.42 | 1471.07 3058.15       |
|                    | H                           | 1.90831200  | -1.26716300 | 1.34067000  | 186.11  | 892.54  | 1222.04 | 1478.84 3098.06       |
|                    | H                           | 2.44330200  | -2.15489200 | -0.08098700 | 214.77  | 919.95  | 1257.03 | 1489.23 3098.79       |
|                    | H                           | 0.48895700  | 1.39569700  | -1.36594000 | 287.76  | 929.63  | 1267.01 | 1491.64 3102.42       |
|                    | H                           | -0.03447100 | 2.14012100  | 0.13942700  | 291.73  | 941.73  | 1305.49 | 1493.27 3106.77       |
|                    | H                           | 2.44331300  | 2.15488500  | -0.08103100 | 308.70  | 975.79  | 1305.53 | 1506.50 3107.71       |
|                    | H                           | 1.90831800  | 1.26718800  | 1.34064400  | 358.66  | 979.69  | 1340.13 | 1507.19 3123.88       |
|                    | H                           | 2.73306000  | -0.00001700 | -1.31666900 | 387.22  | 1028.07 | 1343.93 | 1509.42 3129.72       |
|                    | H                           | 3.69116000  | -0.00000500 | 0.16074700  | 414.46  | 1068.59 | 1359.44 | 1528.49 3146.82       |
|                    | H                           | -0.35851400 | 0.00001400  | 1.36805900  | 446.09  | 1082.59 | 1370.53 | 2982.13 3148.06       |
|                    | C                           | -1.75112700 | 0.00000800  | -0.37906500 | 448.78  | 1100.06 | 1386.54 | 2990.04 <b>60.25</b>  |
|                    | C                           | -2.49792000 | -1.25167400 | 0.09472200  | 503.89  | 1116.00 | 1391.00 | 2994.68 <b>236.05</b> |
|                    | H                           | -3.55789900 | -1.17694200 | -0.15695600 | 546.94  | 1133.63 | 1402.47 | 3036.78 <b>266.89</b> |
|                    | H                           | -2.11522300 | -2.16382100 | -0.36418000 | 773.03  | 1150.24 | 1403.05 | 3047.87               |
|                    | H                           | -2.41633000 | -1.35432600 | 1.18157300  | 792.02  | 1157.48 | 1419.69 | 3050.29               |
|                    | C                           | -2.49793000 | 1.25166700  | 0.09476800  |         |         |         |                       |
|                    | H                           | -2.11522500 | 2.16383600  | -0.36408000 |         |         |         |                       |
|                    | H                           | -3.55790300 | 1.17694600  | -0.15693600 |         |         |         |                       |
|                    | H                           | -2.41636200 | 1.35426600  | 1.18162600  |         |         |         |                       |
|                    | H                           | -0.42992800 | 0.00001400  | 2.33876100  |         |         |         |                       |
|                    | Rotational constants (GHZ): |             |             |             |         |         |         |                       |
|                    |                             | 2.75931     | 1.04041     | 0.82365     |         |         |         |                       |

|                             |         |             |             |             |         |         |         |         |               |
|-----------------------------|---------|-------------|-------------|-------------|---------|---------|---------|---------|---------------|
| TS <sub>4</sub> β'          | C       | -1.94141500 | -1.22749500 | -0.30868100 |         |         |         |         |               |
|                             | C       | -0.47366800 | -1.22617400 | 0.05580500  |         |         |         |         |               |
|                             | C       | 0.31206200  | 0.03212800  | -0.26596500 |         |         |         |         |               |
|                             | C       | -0.46116800 | 1.27381300  | 0.20702700  |         |         |         |         |               |
|                             | C       | -1.91565300 | 1.27902000  | -0.26701500 |         |         |         |         |               |
|                             | C       | -2.65313400 | 0.02614500  | 0.20009400  |         |         |         |         |               |
|                             | H       | -0.46025100 | -1.28419600 | 1.40009800  |         |         |         |         |               |
|                             | H       | 0.03290300  | -2.15396600 | -0.20674500 | 1308.12 | 858.28  | 1194.93 | 1422.94 | 3051.31       |
|                             | H       | -2.03316500 | -1.27197900 | -1.40425700 | 105.79  | 880.41  | 1206.97 | 1474.92 | 3053.36       |
|                             | H       | -2.41935000 | -2.13116400 | 0.08007000  | 178.39  | 897.30  | 1208.85 | 1486.43 | 3088.27       |
|                             | H       | -0.43778000 | 1.29941900  | 1.30493700  | 194.97  | 909.04  | 1225.53 | 1489.72 | 3097.00       |
|                             | H       | 0.03655600  | 2.17936600  | -0.14496500 | 274.47  | 930.59  | 1260.44 | 1491.38 | 3104.15       |
|                             | H       | -2.42048200 | 2.17779500  | 0.09698400  | 303.27  | 937.86  | 1282.18 | 1502.32 | 3112.87       |
|                             | H       | -1.93845200 | 1.32445000  | -1.36317400 | 327.09  | 965.54  | 1299.89 | 1507.01 | 3117.08       |
|                             | H       | -2.67441500 | 0.00720900  | 1.29590600  | 355.42  | 978.15  | 1330.52 | 1507.71 | 3123.20       |
|                             | H       | -3.69091600 | 0.03704300  | -0.14248700 | 403.31  | 1016.90 | 1349.08 | 1527.55 | 3133.47       |
|                             | H       | 0.39872200  | 0.09203200  | -1.36675300 | 418.52  | 1066.70 | 1353.92 | 1548.96 | 3146.10       |
|                             | C       | 1.74729800  | -0.01239800 | 0.30092200  | 445.81  | 1073.58 | 1368.15 | 2946.11 | 3150.83       |
|                             | H       | 1.66254800  | -0.07711300 | 1.39367100  | 468.05  | 1098.28 | 1370.98 | 3005.07 | <b>228.93</b> |
|                             | C       | 2.52283900  | -1.23722200 | -0.19325200 | 517.08  | 1104.41 | 1383.46 | 3030.53 | <b>260.52</b> |
|                             | H       | 3.56225100  | -1.18890100 | 0.13908700  | 576.75  | 1131.55 | 1390.79 | 3034.78 | <b>41.12</b>  |
|                             | H       | 2.10690900  | -2.17451300 | 0.17783000  | 790.05  | 1153.69 | 1405.50 | 3040.19 |               |
|                             | H       | 2.52484800  | -1.27372900 | -1.28806300 | 808.13  | 1165.22 | 1407.81 | 3048.58 |               |
|                             | C       | 2.53129600  | 1.25672800  | -0.04549500 |         |         |         |         |               |
|                             | H       | 2.11273700  | 2.14675900  | 0.42538000  |         |         |         |         |               |
|                             | H       | 3.56810300  | 1.16654000  | 0.28610300  |         |         |         |         |               |
|                             | H       | 2.54071100  | 1.41701800  | -1.12916900 |         |         |         |         |               |
|                             | H       | -0.48221100 | -1.27934400 | 2.34490300  |         |         |         |         |               |
| Rotational constants (GHZ): |         |             |             |             |         |         |         |         |               |
|                             | 2.76047 | 1.03309     | 0.81836     |             |         |         |         |         |               |
| TS <sub>4</sub> γ'          | C       | 1.90729600  | -1.21116000 | 0.06868700  | 1314.71 | 855.55  | 1195.92 | 1423.01 | 3051.65       |
|                             | C       | 0.44192700  | -1.23334300 | -0.30277200 | 108.87  | 878.35  | 1199.09 | 1471.04 | 3053.65       |
|                             | C       | -0.31997400 | 0.01422500  | 0.17344900  | 178.89  | 900.99  | 1222.41 | 1477.07 | 3090.97       |
|                             | C       | 0.43895700  | 1.28011300  | -0.24930000 | 192.11  | 907.35  | 1241.22 | 1488.71 | 3101.37       |
|                             | C       | 1.88871700  | 1.28111500  | 0.23881800  | 255.73  | 930.28  | 1255.04 | 1491.27 | 3101.53       |
|                             | C       | 2.64997900  | 0.05808100  | -0.27265000 | 283.17  | 935.17  | 1280.26 | 1499.74 | 3111.50       |
|                             | H       | 0.35059000  | -1.30029300 | -1.39944700 | 335.25  | 969.12  | 1308.32 | 1506.79 | 3117.28       |
|                             | H       | -0.01457500 | -2.13881000 | 0.10356900  | 362.11  | 977.57  | 1333.24 | 1508.42 | 3120.92       |
|                             | H       | 1.91321100  | -1.25562000 | 1.40304000  | 391.55  | 1012.09 | 1348.64 | 1527.76 | 3123.80       |
|                             | H       | 2.44054800  | -2.13064600 | -0.17609000 | 410.31  | 1069.41 | 1357.17 | 1537.37 | 3143.26       |
|                             | H       | 0.42133900  | 1.35176900  | -1.34613100 | 449.55  | 1073.44 | 1370.59 | 2984.64 | 3146.63       |
|                             | H       | -0.06567200 | 2.16881200  | 0.13464900  | 468.39  | 1099.52 | 1376.98 | 3003.85 | <b>231.90</b> |
|                             | H       | 2.39148100  | 2.19893900  | -0.07656100 | 498.85  | 1111.58 | 1381.21 | 3005.87 | <b>272.36</b> |
|                             | H       | 1.89687100  | 1.27218800  | 1.33492800  | 589.46  | 1131.30 | 1392.55 | 3019.32 | <b>52.20</b>  |
|                             | H       | 2.75430100  | 0.12760800  | -1.36572500 | 790.43  | 1155.42 | 1404.98 | 3028.77 |               |
|                             | H       | 3.66278900  | 0.02999200  | 0.13865800  |         |         |         |         |               |



|                    |                             |                             |             |             |                  |         |         |         |               |
|--------------------|-----------------------------|-----------------------------|-------------|-------------|------------------|---------|---------|---------|---------------|
|                    | H                           | -0.34512600                 | -0.01129800 | 1.27398800  | 813.34           | 1162.84 | 1409.01 | 3049.78 |               |
|                    | C                           | -1.77830700                 | 0.01598200  | -0.32596500 |                  |         |         |         |               |
|                    | H                           | -1.74837100                 | 0.06839500  | -1.42327400 |                  |         |         |         |               |
|                    | C                           | -2.52038100                 | -1.26451000 | 0.06988600  |                  |         |         |         |               |
|                    | H                           | -3.57487400                 | -1.19655300 | -0.20701200 |                  |         |         |         |               |
|                    | H                           | -2.11086200                 | -2.15125500 | -0.41550700 |                  |         |         |         |               |
|                    | H                           | -2.46888800                 | -1.41598000 | 1.15344200  |                  |         |         |         |               |
|                    | C                           | -2.55733500                 | 1.23014000  | 0.18912500  |                  |         |         |         |               |
|                    | H                           | -2.16797400                 | 2.17238000  | -0.19767400 |                  |         |         |         |               |
|                    | H                           | -3.60709200                 | 1.16369700  | -0.10571600 |                  |         |         |         |               |
|                    | H                           | -2.52058900                 | 1.27027100  | 1.28300000  |                  |         |         |         |               |
|                    | H                           | 1.88762200                  | -1.24745300 | 2.35219400  |                  |         |         |         |               |
|                    | Rotational constants (GHZ): |                             |             |             |                  |         |         |         |               |
|                    |                             | 2.75829                     | 1.02727     | 0.81503     |                  |         |         |         |               |
| TS <sub>4</sub> δ' | C                           | -1.87944200                 | -1.26787000 | -0.32855800 |                  |         |         |         |               |
|                    | C                           | -0.44312800                 | -1.25346100 | 0.20287700  |                  |         |         |         |               |
|                    | C                           | 0.33497800                  | -0.00004700 | -0.22338600 |                  |         |         |         |               |
|                    | C                           | -0.44307600                 | 1.25348500  | 0.20261900  |                  |         |         |         |               |
|                    | C                           | -1.87939300                 | 1.26781900  | -0.32881400 |                  |         |         |         |               |
|                    | C                           | -2.61945100                 | 0.00002400  | 0.02134100  |                  |         |         |         |               |
|                    | H                           | -0.46529600                 | -1.29233500 | 1.30018100  |                  |         |         |         |               |
|                    | H                           | 0.06648300                  | -2.15601000 | -0.13912100 | 1315.95 <i>i</i> | 855.67  | 1194.93 | 1421.97 | 3049.02       |
|                    | H                           | -1.85508600                 | -1.37044700 | -1.42388100 | 103.38           | 877.74  | 1208.60 | 1471.99 | 3053.14       |
|                    | H                           | -2.41464300                 | -2.14158500 | 0.05364600  | 178.52           | 897.33  | 1220.55 | 1481.90 | 3089.51       |
|                    | H                           | -0.46522200                 | 1.29261800  | 1.29991500  | 214.94           | 919.16  | 1232.66 | 1483.88 | 3090.04       |
|                    | H                           | 0.06655700                  | 2.15593400  | -0.13961000 | 256.71           | 929.98  | 1244.19 | 1490.83 | 3113.46       |
|                    | H                           | -2.41456700                 | 2.14163400  | 0.05320000  | 281.93           | 944.98  | 1294.83 | 1498.65 | 3115.46       |
|                    | H                           | -1.85502900                 | 1.37016200  | -1.42415900 | 336.20           | 964.84  | 1305.15 | 1506.36 | 3116.81       |
|                    | H                           | -2.68231100                 | 0.00016000  | 1.35987300  | 354.71           | 977.47  | 1323.33 | 1508.40 | 3123.24       |
|                    | H                           | -3.67709100                 | 0.00001900  | -0.24469000 | 397.58           | 1008.71 | 1350.60 | 1527.22 | 3123.95       |
|                    | H                           | 0.40622000                  | -0.00014400 | -1.32326900 | 409.31           | 1065.52 | 1362.22 | 1550.73 | 3146.43       |
|                    | C                           | 1.77378900                  | -0.00006200 | 0.33229200  | 453.20           | 1080.91 | 1371.65 | 2989.73 | 3147.52       |
|                    | H                           | 1.70022800                  | -0.00022800 | 1.42851300  | 465.89           | 1094.93 | 1375.63 | 3003.14 | <b>261.89</b> |
|                    | C                           | 2.55294000                  | -1.24843400 | -0.09405800 | 499.76           | 1107.28 | 1385.58 | 3006.15 | <b>219.05</b> |
|                    | H                           | 3.59418900                  | -1.17755500 | 0.22848100  | 592.16           | 1129.87 | 1387.21 | 3024.67 | <b>46.21</b>  |
|                    | H                           | 2.14102400                  | -2.16435900 | 0.33061700  | 789.22           | 1153.23 | 1404.87 | 3035.49 |               |
|                    | H                           | 2.54847200                  | -1.34711800 | -1.18501200 | 802.37           | 1161.66 | 1408.76 | 3041.12 |               |
|                    | C                           | 2.55287100                  | 1.24848800  | -0.09365100 |                  |         |         |         |               |
|                    | H                           | 2.14096600                  | 2.16423300  | 0.33142400  |                  |         |         |         |               |
|                    | H                           | 3.59414600                  | 1.17750300  | 0.22878200  |                  |         |         |         |               |
|                    | H                           | 2.54831700                  | 1.34760200  | -1.18456700 |                  |         |         |         |               |
|                    | H                           | -2.67788100                 | 0.00025500  | 2.30570200  |                  |         |         |         |               |
|                    |                             | Rotational constants (GHZ): |             |             |                  |         |         |         |               |
|                    |                             |                             | 2.76524     | 1.02403     | 0.81320          |         |         |         |               |

|                          | Cartesian coordinates and rotational constants |             |             |             | Visual  |         |         |         |               |  |
|--------------------------|------------------------------------------------|-------------|-------------|-------------|---------|---------|---------|---------|---------------|--|
| sBCH                     | C                                              | 1.97117300  | -1.44321700 | 0.08397200  |         |         |         |         |               |  |
|                          | C                                              | 0.59590200  | -1.12361400 | -0.50650700 |         |         |         |         |               |  |
|                          | C                                              | -0.01167000 | 0.16096800  | 0.07517600  |         |         |         |         |               |  |
|                          | C                                              | 0.98487700  | 1.32121600  | -0.07131700 |         |         |         |         |               |  |
|                          | C                                              | 2.35857600  | 0.99515300  | 0.51890100  |         |         |         |         |               |  |
|                          | C                                              | 2.94084900  | -0.27644000 | -0.09591500 | 125.21  | 909.87  | 1294.99 | 1499.18 | 3094.07       |  |
|                          | H                                              | 0.68631000  | -1.00508200 | -1.59548700 | 190.79  | 939.65  | 1305.06 | 1501.59 | 3097.78       |  |
|                          | H                                              | -0.07313000 | -1.97106400 | -0.33723700 | 238.17  | 945.59  | 1313.05 | 1507.09 | 3103.90       |  |
|                          | H                                              | 1.86026100  | -1.65380000 | 1.15503800  | 273.26  | 990.31  | 1335.27 | 1510.64 | 3106.70       |  |
|                          | H                                              | 2.37251100  | -2.35057800 | -0.37576400 | 330.89  | 1001.17 | 1348.56 | 1515.92 | 3120.18       |  |
|                          | H                                              | 1.09540100  | 1.55333600  | -1.13990200 | 349.75  | 1017.77 | 1369.69 | 1522.49 | 3130.03       |  |
|                          | H                                              | 3.03786600  | 1.83919100  | 0.37079200  | 403.45  | 1043.07 | 1373.38 | 3004.18 | 3133.38       |  |
|                          | H                                              | 2.25895300  | 0.85531000  | 1.60243200  | 439.11  | 1064.98 | 1381.94 | 3019.96 | 3142.57       |  |
|                          | H                                              | 3.11503300  | -0.11317200 | -1.16663700 | 446.11  | 1074.54 | 1383.08 | 3022.17 | <b>70.10</b>  |  |
|                          | H                                              | 3.91001900  | -0.51077900 | 0.35277900  | 448.21  | 1098.65 | 1388.76 | 3031.67 | <b>85.66</b>  |  |
|                          | H                                              | -0.17235700 | 0.00135200  | 1.15219300  | 534.90  | 1110.13 | 1389.49 | 3036.21 | <b>222.07</b> |  |
|                          | C                                              | -1.37272200 | 0.50157500  | -0.56572800 | 569.91  | 1127.21 | 1409.70 | 3039.73 | <b>260.33</b> |  |
|                          | H                                              | -1.17961200 | 0.72173600  | -1.62492300 | 785.69  | 1151.93 | 1415.19 | 3044.72 |               |  |
|                          | C                                              | -1.99745500 | 1.75345800  | 0.06417400  | 795.18  | 1173.41 | 1419.39 | 3054.49 |               |  |
|                          | H                                              | -1.44874100 | 2.65882500  | -0.19804500 | 799.31  | 1199.57 | 1481.46 | 3060.64 |               |  |
|                          | H                                              | -3.02741300 | 1.88419400  | -0.27760200 | 833.47  | 1222.42 | 1487.08 | 3061.63 |               |  |
|                          | H                                              | -2.01345900 | 1.68070600  | 1.15586500  | 865.49  | 1254.21 | 1488.50 | 3091.02 |               |  |
|                          | C                                              | -2.37058800 | -0.67046600 | -0.53395800 | 899.72  | 1292.68 | 1493.95 | 3092.43 |               |  |
|                          | H                                              | -3.30306700 | -0.32994800 | -0.99580300 |         |         |         |         |               |  |
|                          | H                                              | -2.00526500 | -1.48466400 | -1.16546600 |         |         |         |         |               |  |
|                          | C                                              | -2.67273400 | -1.20906600 | 0.86483600  |         |         |         |         |               |  |
|                          | H                                              | -3.43561500 | -1.98902700 | 0.82261300  |         |         |         |         |               |  |
| H                        | -1.78345600                                    | -1.64261900 | 1.32917200  |             |         |         |         |         |               |  |
| H                        | -3.04294600                                    | -0.42132500 | 1.52543800  |             |         |         |         |         |               |  |
|                          | Rotational constants (GHZ):                    |             |             |             |         |         |         |         |               |  |
|                          | 2.18933                                        | 0.82948     | 0.67448     |             |         |         |         |         |               |  |
| TS <sub>5</sub> $\gamma$ | C                                              | 1.98049100  | -1.42482300 | -0.03775400 | 1378.31 | 836.15  | 1187.10 | 1461.19 | 3055.38       |  |
|                          | C                                              | 0.62933100  | -1.05226900 | -0.65017600 | 137.15  | 865.84  | 1195.94 | 1481.10 | 3085.50       |  |
|                          | C                                              | -0.00146500 | 0.16819300  | 0.03433800  | 247.41  | 900.17  | 1218.57 | 1487.29 | 3092.75       |  |
|                          | C                                              | 0.98761600  | 1.34308000  | 0.00442800  | 247.84  | 909.79  | 1242.70 | 1488.10 | 3094.19       |  |
|                          | C                                              | 2.34474900  | 0.97298700  | 0.60832000  | 278.56  | 941.03  | 1271.68 | 1493.04 | 3097.84       |  |
|                          | C                                              | 2.95304800  | -0.24709800 | -0.08166700 | 331.05  | 944.86  | 1292.89 | 1494.55 | 3106.00       |  |
|                          | H                                              | 0.76153800  | -0.82439800 | -1.71735400 | 346.86  | 983.55  | 1301.14 | 1502.52 | 3111.45       |  |
|                          | H                                              | -0.03843100 | -1.91422600 | -0.58937000 | 395.50  | 996.77  | 1312.86 | 1508.93 | 3114.23       |  |
|                          | H                                              | 1.82316400  | -1.72748800 | 1.00548200  | 409.38  | 1010.61 | 1336.41 | 1519.70 | 3121.13       |  |
|                          | H                                              | 2.40149900  | -2.28963300 | -0.55780200 | 443.17  | 1023.32 | 1348.87 | 1697.04 | 3143.45       |  |
|                          | H                                              | 1.12565400  | 1.66067100  | -1.03882500 | 445.34  | 1065.21 | 1369.57 | 3010.55 | 3192.57       |  |
|                          | H                                              | 0.57727300  | 2.19898500  | 0.54502200  | 449.78  | 1075.47 | 1375.51 | 3017.83 | <b>66.51</b>  |  |
|                          | H                                              | 3.02523200  | 1.82686200  | 0.54762200  | 530.63  | 1095.39 | 1379.31 | 3020.66 | <b>94.20</b>  |  |
|                          | H                                              | 2.21036600  | 0.75033900  | 1.67401400  | 543.31  | 1107.93 | 1380.62 | 3024.68 | <b>221.16</b> |  |
|                          | H                                              | 3.17126400  | 0.00095800  | -1.12780900 |         |         |         |         |               |  |
| H                        | 3.90364300                                     | -0.51638200 | 0.38672600  |             |         |         |         |         |               |  |

|                   |                             |             |             |             |                  |         |         |         |               |
|-------------------|-----------------------------|-------------|-------------|-------------|------------------|---------|---------|---------|---------------|
|                   | H                           | -0.17212700 | -0.08793600 | 1.09083100  | 604.33           | 1122.87 | 1388.84 | 3033.62 | <b>175.81</b> |
|                   | C                           | -1.36002400 | 0.54092600  | -0.59078700 | 793.48           | 1133.69 | 1389.30 | 3037.30 |               |
|                   | H                           | -1.17760400 | 0.76637800  | -1.65033300 | 797.96           | 1160.52 | 1411.71 | 3039.44 |               |
|                   | C                           | -1.96724300 | 1.79338900  | 0.05438700  | 816.52           | 1173.13 | 1416.72 | 3044.83 |               |
|                   | H                           | -1.41532000 | 2.69433000  | -0.21568100 |                  |         |         |         |               |
|                   | H                           | -3.00195900 | 1.93236400  | -0.26929700 |                  |         |         |         |               |
|                   | H                           | -1.96351900 | 1.72074900  | 1.14622200  |                  |         |         |         |               |
|                   | C                           | -2.37185800 | -0.61962100 | -0.55759900 |                  |         |         |         |               |
|                   | H                           | -3.30071600 | -0.26805300 | -1.02784000 |                  |         |         |         |               |
|                   | H                           | -2.02762700 | -1.44691600 | -1.18474400 |                  |         |         |         |               |
|                   | C                           | -2.70400300 | -1.13715800 | 0.82076900  |                  |         |         |         |               |
|                   | H                           | -2.82660400 | -0.39097600 | 1.60451900  |                  |         |         |         |               |
|                   | H                           | -3.47480600 | -1.90494500 | 0.85601600  |                  |         |         |         |               |
|                   | H                           | -1.62691500 | -1.86090200 | 1.29706500  |                  |         |         |         |               |
|                   | H                           | -0.91786200 | -2.34542300 | 1.59998100  |                  |         |         |         |               |
|                   | Rotational constants (GHZ): |             |             |             |                  |         |         |         |               |
|                   |                             | 2.10737     | 0.82058     | 0.67161     |                  |         |         |         |               |
|                   | C                           | 1.94909100  | -1.45349400 | 0.11263400  |                  |         |         |         |               |
|                   | C                           | 0.57838200  | -1.11052500 | -0.47416300 |                  |         |         |         |               |
|                   | C                           | 0.00719800  | 0.19723000  | 0.09199200  |                  |         |         |         |               |
|                   | C                           | 1.02742300  | 1.33136400  | -0.09184500 |                  |         |         |         |               |
|                   | C                           | 2.40033100  | 0.98313800  | 0.48854000  |                  |         |         |         |               |
|                   | C                           | 2.94574900  | -0.31577200 | -0.10198600 |                  |         |         |         |               |
|                   | H                           | 0.66419200  | -1.00932800 | -1.56490900 | 1313.29 <i>i</i> | 839.93  | 1209.22 | 1480.05 | 3056.18       |
|                   | H                           | -0.11049800 | -1.93965900 | -0.29895800 | 135.92           | 865.34  | 1222.73 | 1486.19 | 3093.72       |
|                   | H                           | 1.84314600  | -1.63857400 | 1.18904500  | 200.92           | 900.36  | 1255.06 | 1488.11 | 3095.65       |
|                   | H                           | 2.32200500  | -2.38028400 | -0.33152400 | 237.85           | 909.35  | 1263.57 | 1492.13 | 3098.79       |
|                   | H                           | 1.12879100  | 1.53996100  | -1.16613800 | 266.12           | 938.97  | 1292.74 | 1494.23 | 3099.58       |
|                   | H                           | 0.66500700  | 2.24877000  | 0.37692700  | 278.47           | 946.21  | 1301.56 | 1497.82 | 3107.31       |
|                   | H                           | 3.09705200  | 1.80753200  | 0.31357900  | 332.09           | 987.66  | 1310.72 | 1501.26 | 3109.40       |
|                   | H                           | 2.31000200  | 0.87095500  | 1.57613000  | 343.14           | 1003.46 | 1327.92 | 1508.96 | 3113.89       |
|                   | H                           | 3.11411400  | -0.18160700 | -1.17757700 | 371.26           | 1029.30 | 1342.88 | 1517.31 | 3125.51       |
| TS <sub>5</sub> β | H                           | 3.91300100  | -0.56255600 | 0.34405900  | 418.81           | 1043.79 | 1356.96 | 1573.68 | 3140.80       |
| (S)               | H                           | -0.14404700 | 0.06561800  | 1.17427500  | 436.74           | 1064.92 | 1369.66 | 3004.51 | 3144.79       |
|                   | C                           | -1.35418900 | 0.54698600  | -0.54102500 | 442.56           | 1075.57 | 1381.68 | 3019.23 | <b>68.61</b>  |
|                   | H                           | -1.18872500 | 0.67799900  | -1.61986200 | 496.55           | 1092.36 | 1382.62 | 3024.55 | <b>92.44</b>  |
|                   | C                           | -1.92263600 | 1.86885800  | 0.00585400  | 530.50           | 1101.90 | 1388.87 | 3032.41 | <b>181.89</b> |
|                   | H                           | -1.31710700 | 2.72473500  | -0.29487300 | 573.21           | 1123.75 | 1390.25 | 3037.48 | <b>227.26</b> |
|                   | H                           | -2.93584700 | 2.03609700  | -0.36616000 | 794.89           | 1140.21 | 1407.77 | 3039.62 |               |
|                   | H                           | -1.96274900 | 1.85130900  | 1.09938800  | 798.38           | 1148.80 | 1410.94 | 3040.72 |               |
|                   | C                           | -2.40502400 | -0.54266700 | -0.37593900 | 826.21           | 1190.37 | 1415.54 | 3045.56 |               |
|                   | H                           | -3.35535800 | -0.24819300 | -0.82690900 |                  |         |         |         |               |
|                   | H                           | -2.10051900 | -1.54076200 | -1.21447600 |                  |         |         |         |               |
|                   | C                           | -2.58043900 | -1.17990200 | 0.98247000  |                  |         |         |         |               |
|                   | H                           | -3.37796000 | -1.92465700 | 0.96138800  |                  |         |         |         |               |
|                   | H                           | -1.66725800 | -1.67261500 | 1.32364400  |                  |         |         |         |               |
|                   | H                           | -2.84893500 | -0.42939700 | 1.73530200  |                  |         |         |         |               |
|                   | H                           | -1.92361700 | -2.24663600 | -1.81153900 |                  |         |         |         |               |
|                   | Rotational constants (GHZ): |             |             |             |                  |         |         |         |               |

|                          |         |                             |             |             |          |         |         |         |               |  |
|--------------------------|---------|-----------------------------|-------------|-------------|----------|---------|---------|---------|---------------|--|
|                          | 2.06620 | 0.82929                     | 0.66883     |             |          |         |         |         |               |  |
| TS <sub>5</sub> β<br>(P) | C       | 2.01773300                  | -1.43286500 | 0.14400100  |          |         |         |         |               |  |
|                          | C       | 0.64728300                  | -1.16799300 | -0.48371400 |          |         |         |         |               |  |
|                          | C       | 0.00758300                  | 0.12710200  | 0.03375600  |          |         |         |         |               |  |
|                          | C       | 0.97783600                  | 1.30354700  | -0.14245900 |          |         |         |         |               |  |
|                          | C       | 2.34632900                  | 1.02995500  | 0.48495900  |          |         |         |         |               |  |
|                          | C       | 2.96539100                  | -0.25316600 | -0.06739200 |          |         |         |         |               |  |
|                          | H       | 0.75502400                  | -1.09496800 | -1.57515900 |          |         |         |         |               |  |
|                          | H       | -0.00899100                 | -2.01990700 | -0.28793500 | 1373.87i | 835.49  | 1181.65 | 1464.94 | 3062.58       |  |
|                          | H       | 1.89115500                  | -1.60123000 | 1.22061400  | 123.25   | 866.75  | 1204.11 | 1482.52 | 3093.13       |  |
|                          | H       | 2.44632100                  | -2.34935000 | -0.27063900 | 236.73   | 902.65  | 1219.96 | 1486.45 | 3093.93       |  |
|                          | H       | 1.10294400                  | 1.49893900  | -1.21692500 | 254.74   | 911.27  | 1238.98 | 1489.84 | 3095.41       |  |
|                          | H       | 0.55511900                  | 2.20888500  | 0.29999200  | 259.68   | 941.04  | 1288.85 | 1494.05 | 3098.74       |  |
|                          | H       | 3.01107500                  | 1.88131300  | 0.31527800  | 319.08   | 943.80  | 1293.78 | 1503.08 | 3102.04       |  |
|                          | H       | 2.22747600                  | 0.93205100  | 1.57097700  | 340.45   | 974.21  | 1305.21 | 1506.85 | 3105.67       |  |
|                          | H       | 3.15560600                  | -0.13019700 | -1.14080300 | 349.54   | 997.38  | 1313.61 | 1509.77 | 3113.39       |  |
|                          | H       | 3.93086700                  | -0.44811700 | 0.40715200  | 425.19   | 1012.39 | 1327.46 | 1517.76 | 3131.51       |  |
|                          | H       | -0.17326300                 | 0.01100800  | 1.11159400  | 438.94   | 1042.11 | 1345.03 | 1667.29 | 3135.00       |  |
|                          | C       | -1.34981100                 | 0.40860900  | -0.64999400 | 446.52   | 1065.45 | 1364.43 | 2974.91 | 3192.64       |  |
|                          | H       | -1.13167200                 | 0.54623400  | -1.72206800 | 449.73   | 1076.38 | 1369.85 | 3017.92 | <b>83.66</b>  |  |
|                          | C       | -1.97936000                 | 1.69644000  | -0.15875800 | 533.13   | 1099.38 | 1376.22 | 3020.65 | <b>156.41</b> |  |
|                          | H       | -1.48464000                 | 2.62001400  | -0.45141500 | 557.50   | 1101.82 | 1384.87 | 3034.57 | <b>210.85</b> |  |
|                          | H       | -3.06277400                 | 1.75960000  | -0.25569900 | 601.38   | 1128.29 | 1389.42 | 3038.10 | <b>69.05</b>  |  |
|                          | H       | -1.80914500                 | 1.74442300  | 1.20550100  | 788.42   | 1143.39 | 1390.78 | 3041.04 |               |  |
|                          | C       | -2.34652800                 | -0.75870500 | -0.54339600 | 797.47   | 1149.88 | 1407.10 | 3046.00 |               |  |
|                          | H       | -3.27156300                 | -0.45642300 | -1.04489200 | 801.94   | 1176.50 | 1421.61 | 3060.63 |               |  |
|                          | H       | -1.96925500                 | -1.61724100 | -1.10460900 |          |         |         |         |               |  |
|                          | C       | -2.66408400                 | -1.18090800 | 0.89081500  |          |         |         |         |               |  |
|                          | H       | -3.43926600                 | -1.94950600 | 0.90509400  |          |         |         |         |               |  |
|                          | H       | -1.78372900                 | -1.59006700 | 1.39242900  |          |         |         |         |               |  |
|                          | H       | -3.02018500                 | -0.33618100 | 1.48599100  |          |         |         |         |               |  |
|                          | H       | -1.65534000                 | 1.75861700  | 2.10861600  |          |         |         |         |               |  |
|                          |         | Rotational constants (GHZ): |             |             |          |         |         |         |               |  |
|                          |         | 2.11871                     | 0.81692     | 0.67108     |          |         |         |         |               |  |

|                             |            |             |             |             |                  |         |         |         |               |
|-----------------------------|------------|-------------|-------------|-------------|------------------|---------|---------|---------|---------------|
| TS <sub>5</sub> α           | C          | -1.99642200 | -1.45662800 | -0.04839000 |                  |         |         |         |               |
|                             | C          | -0.60362100 | -1.12702200 | 0.49254700  |                  |         |         |         |               |
|                             | C          | -0.01015200 | 0.13608000  | -0.14870400 |                  |         |         |         |               |
|                             | C          | -0.99479400 | 1.30975500  | -0.02010900 |                  |         |         |         |               |
|                             | C          | -2.38444900 | 0.96636800  | -0.55986300 |                  |         |         |         |               |
|                             | C          | -2.95373200 | -0.27799500 | 0.11927800  |                  |         |         |         |               |
|                             | H          | -0.65940400 | -0.97162800 | 1.57849600  | 1261.88 <i>i</i> | 833.63  | 1213.17 | 1482.27 | 3065.06       |
|                             | H          | 0.05734900  | -1.98179800 | 0.32814600  | 118.08           | 867.63  | 1233.64 | 1487.91 | 3094.56       |
|                             | H          | -1.91789800 | -1.70464600 | -1.11435700 | 230.89           | 901.75  | 1262.67 | 1488.82 | 3095.30       |
|                             | H          | -2.38848800 | -2.34490700 | 0.45415200  | 242.10           | 910.86  | 1276.79 | 1492.15 | 3096.17       |
|                             | H          | -1.07195600 | 1.58391100  | 1.04059900  | 264.25           | 942.29  | 1294.91 | 1494.62 | 3099.65       |
|                             | H          | -0.60863400 | 2.18447600  | -0.54831800 | 288.76           | 948.78  | 1303.01 | 1497.54 | 3104.67       |
|                             | H          | -2.31599100 | 0.78498900  | -1.63974500 | 300.18           | 997.09  | 1310.66 | 1505.91 | 3106.78       |
|                             | H          | -3.09339500 | -0.07483100 | 1.18800800  | 339.59           | 1002.07 | 1335.30 | 1509.04 | 3113.86       |
|                             | H          | -3.93724900 | -0.52230500 | -0.29099400 | 350.05           | 1020.48 | 1345.07 | 1510.60 | 3131.01       |
|                             | H          | 0.12044600  | -0.06308200 | -1.22700300 | 404.07           | 1050.06 | 1350.08 | 1521.02 | 3133.58       |
|                             | C          | 1.36534100  | 0.48344300  | 0.41898200  | 439.22           | 1065.40 | 1368.88 | 2964.11 | 3139.65       |
|                             | H          | 1.10946600  | 0.74901200  | 1.65980700  | 445.38           | 1075.28 | 1375.99 | 3030.79 | <b>75.51</b>  |
|                             | C          | 1.96926100  | 1.76615500  | -0.12348200 | 457.15           | 1093.78 | 1388.47 | 3034.37 | <b>78.88</b>  |
|                             | H          | 1.40809800  | 2.64659300  | 0.19461300  | 539.96           | 1101.42 | 1391.20 | 3038.35 | <b>178.04</b> |
|                             | H          | 2.99899800  | 1.88572400  | 0.22026400  | 562.31           | 1130.18 | 1401.93 | 3038.77 | <b>211.20</b> |
|                             | H          | 1.97812300  | 1.76080400  | -1.22030900 | 785.69           | 1148.16 | 1402.40 | 3040.66 |               |
|                             | C          | 2.36139900  | -0.66336600 | 0.50842600  | 790.84           | 1161.67 | 1410.17 | 3046.39 |               |
|                             | H          | 3.27124000  | -0.29091700 | 0.98908000  | 798.78           | 1183.92 | 1429.02 | 3058.37 |               |
|                             | H          | 1.97280800  | -1.44956300 | 1.16090100  |                  |         |         |         |               |
|                             | C          | 2.71650800  | -1.25740100 | -0.85922200 |                  |         |         |         |               |
|                             | H          | 3.47590400  | -2.03538100 | -0.75930800 |                  |         |         |         |               |
|                             | H          | 1.84095300  | -1.70448200 | -1.33656700 |                  |         |         |         |               |
|                             | H          | 3.10969900  | -0.49080700 | -1.53158900 |                  |         |         |         |               |
|                             | H          | 0.88941000  | 0.94362400  | 2.60212300  |                  |         |         |         |               |
| Rotational constants (GHZ): |            |             |             |             |                  |         |         |         |               |
|                             |            | 2.11530     | 0.81391     | 0.66688     |                  |         |         |         |               |
| TS <sub>5</sub> α'          | C          | 1.95552900  | -1.44654500 | 0.10150500  | 1258.20 <i>i</i> | 834.85  | 1204.57 | 1477.83 | 3064.96       |
|                             | C          | 0.58868400  | -1.14242500 | -0.51683500 | 133.60           | 864.39  | 1212.90 | 1489.09 | 3092.77       |
|                             | C          | 0.00946100  | 0.18369400  | -0.05433000 | 190.23           | 884.38  | 1258.25 | 1491.31 | 3098.19       |
|                             | C          | 1.00358800  | 1.33270000  | -0.13174600 | 236.47           | 919.18  | 1263.20 | 1495.30 | 3099.25       |
|                             | C          | 2.36650500  | 0.99197800  | 0.47583300  | 274.91           | 940.49  | 1286.79 | 1497.80 | 3102.53       |
|                             | C          | 2.93515300  | -0.29555100 | -0.11628700 | 300.56           | 953.03  | 1302.91 | 1501.79 | 3103.92       |
|                             | H          | 0.68563000  | -1.10813200 | -1.61444500 | 322.31           | 988.79  | 1307.12 | 1506.41 | 3106.39       |
|                             | H          | -0.10182400 | -1.95939400 | -0.29435800 | 351.24           | 1002.46 | 1336.85 | 1510.64 | 3127.50       |
|                             | H          | 1.82946100  | -1.60873100 | 1.17857500  | 387.88           | 1021.27 | 1354.65 | 1514.87 | 3134.48       |
|                             | H          | 2.34974500  | -2.37623600 | -0.31690500 | 395.23           | 1048.04 | 1359.07 | 1522.42 | 3136.98       |
|                             | H          | 1.13402800  | 1.60012500  | -1.19265800 | 437.18           | 1067.88 | 1369.54 | 2976.18 | 3144.43       |
|                             | H          | 0.59565100  | 2.21601200  | 0.36517300  | 449.15           | 1083.94 | 1378.02 | 2987.35 | <b>73.93</b>  |
|                             | H          | 3.05580600  | 1.82660400  | 0.32375500  | 452.07           | 1101.65 | 1384.86 | 2994.38 | <b>85.31</b>  |
|                             | H          | 2.25088300  | 0.86593200  | 1.55871700  | 535.45           | 1110.69 | 1389.54 | 3035.97 | <b>226.19</b> |
|                             | H          | 3.10630300  | -0.15988800 | -1.19161100 |                  |         |         |         |               |
| H                           | 3.90344700 | -0.52809600 | 0.33458100  |             |                  |         |         |         |               |

|                    |                             |             |             |             |                  |         |         |         |               |
|--------------------|-----------------------------|-------------|-------------|-------------|------------------|---------|---------|---------|---------------|
|                    | H                           | -0.14304300 | 0.04109100  | 1.25452300  | 590.86           | 1128.62 | 1401.95 | 3047.57 | <b>262.03</b> |
|                    | C                           | -1.37874700 | 0.52233600  | -0.59623700 | 769.38           | 1147.72 | 1415.01 | 3050.55 |               |
|                    | H                           | -1.23086000 | 0.78633600  | -1.65650300 | 791.64           | 1162.01 | 1421.83 | 3059.12 |               |
|                    | C                           | -1.98568500 | 1.74762600  | 0.10236000  | 794.39           | 1176.91 | 1470.18 | 3062.70 |               |
|                    | H                           | -1.46278400 | 2.66755300  | -0.16144500 |                  |         |         |         |               |
|                    | H                           | -3.03208700 | 1.87059400  | -0.18724600 |                  |         |         |         |               |
|                    | H                           | -1.94595500 | 1.64050600  | 1.18979900  |                  |         |         |         |               |
|                    | C                           | -2.36566200 | -0.65848200 | -0.58054900 |                  |         |         |         |               |
|                    | H                           | -3.29749600 | -0.31395900 | -1.04027600 |                  |         |         |         |               |
|                    | H                           | -1.99355700 | -1.45896600 | -1.22583600 |                  |         |         |         |               |
|                    | C                           | -2.66996600 | -1.21836900 | 0.80911100  |                  |         |         |         |               |
|                    | H                           | -3.42855600 | -2.00151700 | 0.74979600  |                  |         |         |         |               |
|                    | H                           | -1.78130300 | -1.64822100 | 1.27649800  |                  |         |         |         |               |
|                    | H                           | -3.04646200 | -0.44155200 | 1.47881600  |                  |         |         |         |               |
|                    | H                           | -0.20018400 | -0.01183100 | 2.21409900  |                  |         |         |         |               |
|                    | Rotational constants (GHZ): |             |             |             |                  |         |         |         |               |
|                    |                             | 2.13018     | 0.82482     | 0.67450     |                  |         |         |         |               |
|                    | C                           | -1.98386000 | -1.43148200 | -0.14157700 |                  |         |         |         |               |
|                    | C                           | -0.58314700 | -1.12268300 | 0.33792700  |                  |         |         |         |               |
|                    | C                           | 0.03077000  | 0.18160200  | -0.13626900 |                  |         |         |         |               |
|                    | C                           | -0.97080100 | 1.33518700  | 0.03849200  |                  |         |         |         |               |
|                    | C                           | -2.34521800 | 1.01609000  | -0.55202000 |                  |         |         |         |               |
|                    | C                           | -2.93028500 | -0.24980600 | 0.07049200  |                  |         |         |         |               |
|                    | H                           | -0.70344400 | -0.96114900 | 1.66797500  | 1239.82 <i>i</i> | 833.90  | 1205.68 | 1476.28 | 3062.39       |
|                    | H                           | 0.08624800  | -1.98140000 | 0.28706600  | 118.53           | 871.87  | 1210.34 | 1486.42 | 3087.92       |
|                    | H                           | -1.94418100 | -1.67064900 | -1.21495700 | 187.47           | 896.43  | 1218.06 | 1492.74 | 3092.64       |
|                    | H                           | -2.35987100 | -2.32656100 | 0.36206400  | 195.22           | 909.63  | 1254.73 | 1499.56 | 3096.35       |
|                    | H                           | -1.07778700 | 1.54223600  | 1.11182600  | 256.36           | 935.01  | 1282.82 | 1500.69 | 3102.82       |
|                    | H                           | -0.57723100 | 2.24219900  | -0.42476100 | 288.14           | 944.60  | 1293.97 | 1504.83 | 3111.04       |
|                    | H                           | -3.01978800 | 1.86298200  | -0.40062200 | 302.43           | 989.54  | 1304.35 | 1510.33 | 3121.71       |
|                    | H                           | -2.25042000 | 0.87576400  | -1.63618100 | 336.42           | 1001.01 | 1328.92 | 1513.94 | 3128.82       |
|                    | H                           | -3.07059500 | -0.09114500 | 1.14604700  | 352.42           | 1019.20 | 1348.23 | 1522.62 | 3132.60       |
|                    | H                           | -3.91283500 | -0.47202200 | -0.35343000 | 400.98           | 1042.80 | 1355.15 | 1556.25 | 3134.38       |
|                    | C                           | 1.37650700  | 0.48729700  | 0.55656700  | 447.53           | 1067.37 | 1369.67 | 2962.18 | 3143.92       |
|                    | H                           | 1.15252200  | 0.66701800  | 1.61637600  | 457.69           | 1075.20 | 1372.52 | 3004.55 | <b>65.39</b>  |
|                    | C                           | 2.01805200  | 1.75993000  | -0.01015900 | 491.96           | 1098.42 | 1381.16 | 3030.58 | <b>84.98</b>  |
|                    | H                           | 1.45477700  | 2.65429300  | 0.25885000  | 547.20           | 1100.02 | 1385.07 | 3034.50 | <b>259.24</b> |
|                    | H                           | 3.03270100  | 1.88350400  | 0.37641500  | 592.54           | 1130.10 | 1389.39 | 3040.44 | <b>228.03</b> |
|                    | H                           | 2.07776000  | 1.72152100  | -1.10216400 | 784.62           | 1144.05 | 1406.75 | 3050.14 |               |
|                    | C                           | 2.37011900  | -0.68692700 | 0.50706400  | 792.42           | 1163.79 | 1415.60 | 3055.36 |               |
|                    | H                           | 3.29474400  | -0.36200900 | 0.99474000  | 812.37           | 1188.09 | 1419.61 | 3061.02 |               |
|                    | H                           | 1.99329400  | -1.51621100 | 1.11189300  |                  |         |         |         |               |
|                    | C                           | 2.69581500  | -1.18653400 | -0.90098000 |                  |         |         |         |               |
|                    | H                           | 3.45697900  | -1.96846500 | -0.86742300 |                  |         |         |         |               |
|                    | H                           | 1.81473700  | -1.60575000 | -1.39352600 |                  |         |         |         |               |
|                    | H                           | 3.07865200  | -0.38106600 | -1.53239600 |                  |         |         |         |               |
|                    | H                           | -0.81785500 | -0.80844800 | 2.59381000  |                  |         |         |         |               |
|                    | Rotational constants (GHZ): |             |             |             |                  |         |         |         |               |
| TS <sub>5</sub> β' |                             |             |             |             |                  |         |         |         |               |

|                    |         |                             |             |             |          |         |         |         |               |
|--------------------|---------|-----------------------------|-------------|-------------|----------|---------|---------|---------|---------------|
|                    | 2.12169 | 0.81749                     | 0.67163     |             |          |         |         |         |               |
| TS <sub>5</sub> γ' | C       | 1.96727800                  | -1.37083300 | -0.11703700 |          |         |         |         |               |
|                    | C       | 0.57242200                  | -1.06713000 | -0.61448900 |          |         |         |         |               |
|                    | C       | -0.03297400                 | 0.18463500  | 0.03949600  |          |         |         |         |               |
|                    | C       | 0.95340700                  | 1.35596600  | -0.07004400 |          |         |         |         |               |
|                    | C       | 2.31815100                  | 1.01913400  | 0.53346900  |          |         |         |         |               |
|                    | C       | 2.93443500                  | -0.21157000 | -0.13262300 |          |         |         |         |               |
|                    | H       | 0.60247700                  | -0.91256600 | -1.70545300 |          |         |         |         |               |
|                    | H       | -0.06533900                 | -1.93823200 | -0.44235900 | 1230.36i | 833.07  | 1201.60 | 1471.41 | 3061.72       |
|                    | H       | 1.78675600                  | -1.65603900 | 1.17545500  | 125.71   | 864.76  | 1220.19 | 1477.36 | 3089.49       |
|                    | H       | 2.37757600                  | -2.31106000 | -0.48757800 | 185.96   | 899.64  | 1230.66 | 1490.43 | 3090.76       |
|                    | H       | 1.07434500                  | 1.61943700  | -1.13038800 | 205.10   | 909.08  | 1255.91 | 1498.84 | 3100.73       |
|                    | H       | 0.54855900                  | 2.23730700  | 0.43175500  | 250.44   | 934.57  | 1275.96 | 1499.56 | 3101.89       |
|                    | H       | 2.99265000                  | 1.87447600  | 0.44332200  | 272.42   | 945.06  | 1301.56 | 1502.74 | 3109.95       |
|                    | H       | 2.19513100                  | 0.82004700  | 1.60435900  | 297.07   | 988.05  | 1306.12 | 1511.10 | 3121.36       |
|                    | H       | 3.18237000                  | 0.02929100  | -1.17725500 | 348.89   | 1001.54 | 1329.96 | 1515.33 | 3121.54       |
|                    | H       | 3.87220600                  | -0.48997600 | 0.35602800  | 359.63   | 1017.05 | 1347.32 | 1523.23 | 3129.45       |
|                    | H       | -0.16690500                 | -0.02902800 | 1.10994700  | 399.04   | 1041.50 | 1360.11 | 1548.99 | 3134.24       |
|                    | C       | -1.41098500                 | 0.53321700  | -0.55663800 | 442.27   | 1068.90 | 1372.05 | 2988.73 | 3143.29       |
|                    | H       | -1.24613500                 | 0.80364100  | -1.60906000 | 451.90   | 1076.90 | 1373.07 | 3005.08 | <b>68.89</b>  |
|                    | C       | -2.03975800                 | 1.74451800  | 0.14406300  | 468.95   | 1102.59 | 1382.62 | 3012.59 | <b>83.02</b>  |
|                    | H       | -1.51187300                 | 2.67008800  | -0.08877900 | 559.20   | 1108.59 | 1383.56 | 3019.38 | <b>258.74</b> |
|                    | H       | -3.07910700                 | 1.87311100  | -0.16859800 | 595.39   | 1129.76 | 1392.35 | 3033.07 | <b>224.10</b> |
|                    | H       | -2.02976900                 | 1.62159100  | 1.23119700  | 785.49   | 1146.86 | 1410.78 | 3051.39 |               |
|                    | C       | -2.38749900                 | -0.65737600 | -0.55248200 | 795.06   | 1159.71 | 1416.34 | 3055.45 |               |
|                    | H       | -3.33661800                 | -0.31457300 | -0.97706700 | 815.56   | 1185.80 | 1420.13 | 3061.04 |               |
|                    | H       | -2.02402800                 | -1.43669800 | -1.22789100 |          |         |         |         |               |
|                    | C       | -2.64547200                 | -1.26115500 | 0.82869200  |          |         |         |         |               |
|                    | H       | -3.39159400                 | -2.05598000 | 0.76918400  |          |         |         |         |               |
|                    | H       | -1.73721300                 | -1.69289900 | 1.25722300  |          |         |         |         |               |
|                    | H       | -3.01905800                 | -0.51057400 | 1.52936300  |          |         |         |         |               |
|                    | H       | 1.60153400                  | -1.81780800 | 2.09215100  |          |         |         |         |               |
|                    |         | Rotational constants (GHZ): |             |             |          |         |         |         |               |
|                    |         | 2.11151                     | 0.82022     | 0.67165     |          |         |         |         |               |

|                    |                                                |             |             |             |                  |         |         |         |               |
|--------------------|------------------------------------------------|-------------|-------------|-------------|------------------|---------|---------|---------|---------------|
| TS <sub>5</sub> δ' | C                                              | -1.91669600 | -1.46106600 | -0.14646200 |                  |         |         |         |               |
|                    | C                                              | -0.56642500 | -1.11712400 | 0.48923500  |                  |         |         |         |               |
|                    | C                                              | 0.04932000  | 0.16301800  | -0.09216000 |                  |         |         |         |               |
|                    | C                                              | -0.95155800 | 1.32001500  | 0.04343100  |                  |         |         |         |               |
|                    | C                                              | -2.30540800 | 1.00559200  | -0.59915700 |                  |         |         |         |               |
|                    | C                                              | -2.87581500 | -0.29673600 | -0.09189200 |                  |         |         |         |               |
|                    | H                                              | -0.70049200 | -0.98020900 | 1.57061200  | 1253.98 <i>i</i> | 832.95  | 1206.41 | 1472.03 | 3062.21       |
|                    | H                                              | 0.11122100  | -1.96369000 | 0.35767600  | 119.19           | 866.92  | 1218.89 | 1481.81 | 3088.41       |
|                    | H                                              | -1.75605800 | -1.73581800 | -1.19998800 | 187.95           | 895.44  | 1230.71 | 1485.09 | 3089.55       |
|                    | H                                              | -2.35189000 | -2.33826500 | 0.34044300  | 211.68           | 920.09  | 1238.05 | 1498.03 | 3093.13       |
|                    | H                                              | -1.10012900 | 1.52887500  | 1.11121100  | 224.18           | 939.64  | 1287.73 | 1499.31 | 3110.67       |
|                    | H                                              | -0.54847000 | 2.22886800  | -0.40753800 | 280.62           | 946.14  | 1303.49 | 1502.02 | 3113.32       |
|                    | H                                              | -3.00772800 | 1.82512900  | -0.42293700 | 288.81           | 986.25  | 1308.19 | 1510.22 | 3121.15       |
|                    | H                                              | -2.17651300 | 0.93285200  | -1.68952200 | 335.78           | 1000.52 | 1322.46 | 1515.86 | 3123.49       |
|                    | H                                              | -3.08698700 | -0.09046600 | 1.21474600  | 359.14           | 1015.69 | 1347.83 | 1522.68 | 3129.54       |
|                    | H                                              | -3.88460100 | -0.52013300 | -0.44102100 | 403.01           | 1040.58 | 1359.74 | 1556.50 | 3133.78       |
|                    | C                                              | 1.40059900  | 0.50821900  | 0.56704400  | 443.42           | 1063.53 | 1373.04 | 3001.49 | 3143.99       |
|                    | H                                              | 1.19156400  | 0.73692700  | 1.62118800  | 452.77           | 1084.84 | 1378.15 | 3002.66 | <b>66.90</b>  |
|                    | C                                              | 2.03515900  | 1.75441600  | -0.06462300 | 468.25           | 1096.31 | 1381.30 | 3005.62 | <b>81.28</b>  |
|                    | H                                              | 1.48526000  | 2.66306100  | 0.18311700  | 564.66           | 1105.04 | 1386.88 | 3024.54 | <b>252.49</b> |
|                    | H                                              | 3.06047000  | 1.88634300  | 0.29005900  | 593.87           | 1129.49 | 1388.29 | 3035.36 | <b>260.62</b> |
|                    | H                                              | 2.06618800  | 1.67276500  | -1.15535900 | 786.21           | 1143.42 | 1410.99 | 3041.74 |               |
|                    | C                                              | 2.39844800  | -0.66431200 | 0.55864400  | 789.95           | 1162.19 | 1415.59 | 3055.22 |               |
|                    | H                                              | 3.32548800  | -0.31860300 | 1.02725100  | 805.27           | 1186.36 | 1419.29 | 3061.23 |               |
|                    | H                                              | 2.02694600  | -1.47181000 | 1.19504300  |                  |         |         |         |               |
|                    | C                                              | 2.71628500  | -1.21715800 | -0.83109200 |                  |         |         |         |               |
|                    | H                                              | 3.47930700  | -1.99584200 | -0.77240700 |                  |         |         |         |               |
|                    | H                                              | 1.83270200  | -1.65662900 | -1.30092100 |                  |         |         |         |               |
|                    | H                                              | 3.09300800  | -0.43598900 | -1.49579200 |                  |         |         |         |               |
|                    | H                                              | -3.18805700 | 0.06304700  | 2.14292600  |                  |         |         |         |               |
|                    | Rotational constants (GHZ):                    |             |             |             |                  |         |         |         |               |
|                    | 2.12570                                        | 0.81330     | 0.66746     |             |                  |         |         |         |               |
|                    | Cartesian coordinates and rotational constants |             |             |             | Visual           |         |         |         |               |
| <i>i</i> BCH       | C                                              | -2.08247800 | 1.41283300  | -0.18783400 | 132.41           | 922.00  | 1292.09 | 1493.47 | 3092.87       |
|                    | C                                              | -0.68484500 | 0.94396600  | -0.60057800 | 174.81           | 935.01  | 1305.02 | 1494.73 | 3093.94       |
|                    | C                                              | -0.22263100 | -0.26831200 | 0.21592600  | 233.81           | 942.06  | 1312.58 | 1498.23 | 3095.27       |
|                    | C                                              | -1.26268900 | -1.39151900 | 0.12360800  | 294.01           | 963.92  | 1334.91 | 1508.05 | 3099.26       |
|                    | C                                              | -2.65641500 | -0.92533200 | 0.54727900  | 312.87           | 979.17  | 1353.63 | 1509.78 | 3113.48       |
|                    | C                                              | -3.10396900 | 0.27862600  | -0.28330900 | 338.61           | 1001.86 | 1366.95 | 1516.27 | 3119.23       |
|                    | H                                              | -0.69054600 | 0.66743700  | -1.66427100 | 405.10           | 1054.30 | 1372.13 | 3016.10 | 3127.84       |
|                    | H                                              | 0.02594400  | 1.76861000  | -0.49376400 | 430.21           | 1061.14 | 1381.78 | 3017.25 | 3130.35       |
|                    | H                                              | -2.04574300 | 1.77466900  | 0.84725200  | 444.97           | 1079.50 | 1386.28 | 3024.03 | <b>238.97</b> |
|                    | H                                              | -2.39313800 | 2.25901100  | -0.80675600 | 457.44           | 1100.35 | 1388.47 | 3032.37 | <b>264.48</b> |
|                    | H                                              | -1.30282800 | -1.74667400 | -0.91505700 | 481.92           | 1119.31 | 1400.25 | 3036.34 | <b>71.85</b>  |
|                    | H                                              | -0.94172100 | -2.24132000 | 0.73459100  | 577.87           | 1132.62 | 1404.86 | 3040.49 | <b>81.56</b>  |
|                    | H                                              | -3.37480900 | -1.74397900 | 0.45086300  | 791.89           | 1154.25 | 1411.77 | 3043.22 |               |
|                    | H                                              | -2.63605200 | -0.64366800 | 1.60718900  |                  |         |         |         |               |
| H                  | -3.20486800                                    | -0.02692500 | -1.33207300 |             |                  |         |         |         |               |



|                   |                             |                             |             |             |                  |         |         |         |               |
|-------------------|-----------------------------|-----------------------------|-------------|-------------|------------------|---------|---------|---------|---------------|
|                   | H                           | -4.08852200                 | 0.62424500  | 0.04331000  | 798.80           | 1187.41 | 1421.88 | 3044.93 |               |
|                   | H                           | -0.16395200                 | 0.03762900  | 1.26996200  | 829.54           | 1202.08 | 1477.33 | 3045.50 |               |
|                   | C                           | 1.15142100                  | -0.78238300 | -0.22318900 | 850.35           | 1222.70 | 1481.85 | 3049.80 |               |
|                   | H                           | 1.43102700                  | -1.62559900 | 0.42320800  | 865.25           | 1248.05 | 1488.66 | 3064.20 |               |
|                   | H                           | 1.06074500                  | -1.19119600 | -1.23832000 | 908.44           | 1289.23 | 1489.22 | 3083.93 |               |
|                   | C                           | 2.29888300                  | 0.23522800  | -0.20689600 |                  |         |         |         |               |
|                   | H                           | 2.08563100                  | 1.01158000  | -0.95069900 |                  |         |         |         |               |
|                   | C                           | 2.44841600                  | 0.90519100  | 1.15934100  |                  |         |         |         |               |
|                   | H                           | 2.58554200                  | 0.14941800  | 1.94023400  |                  |         |         |         |               |
|                   | H                           | 3.31915300                  | 1.56532200  | 1.17607200  |                  |         |         |         |               |
|                   | H                           | 1.57188200                  | 1.50215300  | 1.42121700  |                  |         |         |         |               |
|                   | C                           | 3.60512000                  | -0.45039100 | -0.60937500 |                  |         |         |         |               |
|                   | H                           | 3.51351000                  | -0.93779600 | -1.58334600 |                  |         |         |         |               |
|                   | H                           | 4.42848500                  | 0.26595200  | -0.66408900 |                  |         |         |         |               |
|                   | H                           | 3.87537900                  | -1.21631000 | 0.12463800  |                  |         |         |         |               |
|                   | Rotational constants (GHZ): |                             |             |             |                  |         |         |         |               |
|                   |                             | 2.75978                     | 0.65169     | 0.59779     |                  |         |         |         |               |
| TS <sub>6,7</sub> | C                           | 2.16463300                  | -1.39602800 | -0.11065500 |                  |         |         |         |               |
|                   | C                           | 0.76317700                  | -0.97922100 | -0.56454400 |                  |         |         |         |               |
|                   | C                           | 0.26180900                  | 0.25817900  | 0.18890100  |                  |         |         |         |               |
|                   | C                           | 1.27734700                  | 1.40014600  | 0.05797600  |                  |         |         |         |               |
|                   | C                           | 2.67458900                  | 0.98633600  | 0.52247900  |                  |         |         |         |               |
|                   | C                           | 3.16182700                  | -0.24410700 | -0.24450600 |                  |         |         |         |               |
|                   | H                           | 0.77878200                  | -0.75162000 | -1.63969200 | 1389.64 <i>i</i> | 851.49  | 1190.67 | 1459.65 | 3053.62       |
|                   | H                           | 0.07071700                  | -1.81556100 | -0.42969900 | 128.60           | 865.41  | 1191.89 | 1479.08 | 3068.33       |
|                   | H                           | 2.11999500                  | -1.71002900 | 0.93959900  | 175.85           | 908.68  | 1219.19 | 1483.11 | 3085.81       |
|                   | H                           | 2.50331500                  | -2.26266700 | -0.68485800 | 236.57           | 920.22  | 1248.31 | 1488.73 | 3089.85       |
|                   | H                           | 1.32508000                  | 1.70685700  | -0.99568600 | 269.29           | 932.70  | 1283.24 | 1489.26 | 3094.82       |
|                   | H                           | 0.92808000                  | 2.26971600  | 0.62370900  | 298.52           | 942.55  | 1292.89 | 1494.85 | 3095.87       |
|                   | H                           | 3.37538800                  | 1.81625800  | 0.39778200  | 324.94           | 957.67  | 1300.81 | 1502.48 | 3099.93       |
|                   | H                           | 2.64471200                  | 0.75400600  | 1.59403200  | 338.00           | 978.00  | 1305.47 | 1508.18 | 3103.66       |
|                   | H                           | 3.27224300                  | 0.01463600  | -1.30482700 | 410.29           | 999.26  | 1331.28 | 1509.16 | 3123.37       |
|                   | H                           | 4.14854900                  | -0.55156500 | 0.11218200  | 444.27           | 1047.00 | 1342.65 | 1666.59 | 3135.89       |
|                   | H                           | 0.19503100                  | 0.00035500  | 1.25515900  | 448.42           | 1060.02 | 1360.72 | 2999.23 | 3188.46       |
|                   | C                           | -1.11619000                 | 0.72185500  | -0.29040400 | 467.13           | 1080.00 | 1368.59 | 3016.96 | <b>67.57</b>  |
|                   | H                           | -1.42491000                 | 1.58652200  | 0.31119900  | 492.04           | 1101.34 | 1381.96 | 3023.60 | <b>81.37</b>  |
|                   | H                           | -1.02351800                 | 1.08067600  | -1.32394600 | 561.54           | 1111.41 | 1386.28 | 3024.23 | <b>163.40</b> |
|                   | C                           | -2.23880200                 | -0.32416000 | -0.23583900 | 586.37           | 1124.04 | 1389.05 | 3034.09 | <b>258.30</b> |
|                   | H                           | -1.99080400                 | -1.13263700 | -0.93964900 | 792.96           | 1141.70 | 1399.48 | 3037.10 |               |
|                   | C                           | -2.39438300                 | -0.93854200 | 1.15720100  | 799.49           | 1164.72 | 1410.45 | 3040.77 |               |
|                   | H                           | -2.55569900                 | -0.15300000 | 1.90190200  | 829.99           | 1167.02 | 1413.40 | 3045.59 |               |
|                   | H                           | -3.25154700                 | -1.61531600 | 1.19005500  |                  |         |         |         |               |
|                   | H                           | -1.50815800                 | -1.50577400 | 1.44875700  |                  |         |         |         |               |
|                   | C                           | -3.53941000                 | 0.28575900  | -0.70005000 |                  |         |         |         |               |
|                   | H                           | -4.41811900                 | -0.35512900 | -0.63815900 |                  |         |         |         |               |
|                   | H                           | -3.82606800                 | 1.25687500  | 0.23418900  |                  |         |         |         |               |
|                   | H                           | -3.49506300                 | 0.86216500  | -1.62356500 |                  |         |         |         |               |
|                   | H                           | -3.95559200                 | 1.88392100  | 0.88815300  |                  |         |         |         |               |
|                   |                             | Rotational constants (GHZ): |             |             |                  |         |         |         |               |

|                   |         |                             |             |             |         |         |         |         |               |
|-------------------|---------|-----------------------------|-------------|-------------|---------|---------|---------|---------|---------------|
|                   | 2.68134 | 0.63891                     | 0.58471     |             |         |         |         |         |               |
| TS <sub>6</sub> β | C       | -2.08521400                 | 1.42025600  | -0.10085300 |         |         |         |         |               |
|                   | C       | -0.69411300                 | 0.95541000  | -0.53876900 |         |         |         |         |               |
|                   | C       | -0.25295000                 | -0.30690700 | 0.21113000  |         |         |         |         |               |
|                   | C       | -1.30699500                 | -1.40936300 | 0.04892100  |         |         |         |         |               |
|                   | C       | -2.69596700                 | -0.94833300 | 0.49338300  |         |         |         |         |               |
|                   | C       | -3.12325000                 | 0.30932200  | -0.26532800 |         |         |         |         |               |
|                   | H       | -0.70135600                 | 0.73715800  | -1.61566700 | 1292.54 | 845.58  | 1212.10 | 1467.41 | 3045.38       |
|                   | H       | 0.02966500                  | 1.76211400  | -0.39500100 | 131.92  | 864.86  | 1225.79 | 1478.26 | 3050.58       |
|                   | H       | -2.04634700                 | 1.72051800  | 0.95380400  | 178.79  | 910.04  | 1265.83 | 1486.38 | 3083.67       |
|                   | H       | -2.38032800                 | 2.30581900  | -0.66996000 | 238.26  | 923.38  | 1286.41 | 1486.88 | 3094.88       |
|                   | H       | -1.00229000                 | -2.29783300 | 0.61135500  | 258.41  | 942.64  | 1293.21 | 1487.92 | 3095.61       |
|                   | H       | -3.42471800                 | -1.74996600 | 0.34585300  | 292.29  | 947.27  | 1301.11 | 1489.60 | 3099.24       |
|                   | H       | -2.67647000                 | -0.73072800 | 1.56833100  | 309.77  | 970.44  | 1311.35 | 1494.45 | 3102.17       |
|                   | H       | -3.22571700                 | 0.06826900  | -1.33053000 | 338.03  | 991.30  | 1322.70 | 1500.78 | 3105.60       |
|                   | H       | -4.10357200                 | 0.64893000  | 0.07969300  | 369.44  | 1006.78 | 1343.54 | 1508.92 | 3107.23       |
|                   | H       | -0.19439500                 | -0.06437600 | 1.28166800  | 398.40  | 1050.63 | 1368.63 | 1516.69 | 3133.50       |
|                   | C       | 1.11424000                  | -0.81699600 | -0.25116600 | 418.93  | 1059.32 | 1381.53 | 2995.16 | 3137.85       |
|                   | H       | 1.35110100                  | -1.73475600 | 0.30986500  | 446.52  | 1078.15 | 1385.29 | 3016.29 | <b>76.17</b>  |
|                   | H       | 1.04140600                  | -1.12029800 | -1.30423100 | 454.75  | 1102.06 | 1388.45 | 3025.83 | <b>87.59</b>  |
|                   | C       | 2.29415400                  | 0.12802500  | -0.10132500 | 487.77  | 1119.06 | 1394.62 | 3030.54 | <b>202.41</b> |
|                   | H       | 2.12957700                  | 1.04866200  | -1.00315900 | 579.19  | 1126.06 | 1400.74 | 3032.33 | <b>222.46</b> |
|                   | C       | 2.38107500                  | 0.87506900  | 1.21154600  | 792.51  | 1147.83 | 1412.49 | 3036.86 |               |
|                   | H       | 2.48846000                  | 0.16612600  | 2.04275200  | 799.65  | 1165.31 | 1415.01 | 3037.41 |               |
|                   | H       | 3.25023300                  | 1.53657500  | 1.22373000  | 814.67  | 1182.19 | 1445.59 | 3040.02 |               |
|                   | H       | 1.49167100                  | 1.47841100  | 1.40396600  |         |         |         |         |               |
|                   | C       | 3.60427100                  | -0.50313400 | -0.52407000 |         |         |         |         |               |
|                   | H       | 3.51935500                  | -0.96593200 | -1.51030300 |         |         |         |         |               |
|                   | H       | 4.40677600                  | 0.23731200  | -0.56017200 |         |         |         |         |               |
|                   | H       | 3.89746500                  | -1.28277100 | 0.18934800  |         |         |         |         |               |
|                   | H       | 2.08430700                  | 1.71928000  | -1.71329100 |         |         |         |         |               |
|                   |         | Rotational constants (GHZ): |             |             |         |         |         |         |               |
|                   |         | 2.66157                     | 0.64712     | 0.59041     |         |         |         |         |               |

|                             |            |             |             |             |                  |         |         |         |               |
|-----------------------------|------------|-------------|-------------|-------------|------------------|---------|---------|---------|---------------|
| TS <sub>6</sub> α           | C          | -2.64295500 | 0.98297300  | 0.49385800  |                  |         |         |         |               |
|                             | C          | -1.24842600 | 1.38452000  | 0.01120300  |                  |         |         |         |               |
|                             | C          | -0.23938500 | 0.23993000  | 0.16289600  |                  |         |         |         |               |
|                             | C          | -0.74795000 | -1.01422400 | -0.56984000 |                  |         |         |         |               |
|                             | C          | -2.14496700 | -1.41680200 | -0.09072800 |                  |         |         |         |               |
|                             | C          | -3.13929200 | -0.26398700 | -0.24053000 |                  |         |         |         |               |
|                             | H          | -1.30017700 | 1.66607000  | -1.04907300 | 1280.27 <i>i</i> | 860.59  | 1201.16 | 1482.51 | 3054.66       |
|                             | H          | -0.89005900 | 2.26300800  | 0.55648800  | 124.13           | 864.56  | 1213.01 | 1486.74 | 3083.14       |
|                             | H          | -2.60597900 | 0.77653100  | 1.57036200  | 167.00           | 907.68  | 1222.02 | 1489.64 | 3090.37       |
|                             | H          | -3.34283000 | 1.81118800  | 0.35453600  | 241.02           | 921.49  | 1255.53 | 1492.41 | 3092.52       |
|                             | H          | -0.77571200 | -0.80255900 | -1.64714700 | 242.64           | 933.54  | 1291.16 | 1494.47 | 3095.53       |
|                             | H          | -0.04902900 | -1.84380200 | -0.42742700 | 290.96           | 941.42  | 1297.81 | 1497.07 | 3097.03       |
|                             | H          | -2.49187500 | -2.29431300 | -0.64318100 | 311.80           | 962.71  | 1304.13 | 1507.85 | 3101.23       |
|                             | H          | -2.08945900 | -1.70807300 | 0.96538700  | 332.37           | 979.96  | 1329.00 | 1509.54 | 3122.92       |
|                             | H          | -3.25930300 | -0.02944300 | -1.30538600 | 363.48           | 1007.06 | 1336.41 | 1515.52 | 3126.30       |
|                             | H          | -4.12332900 | -0.56047200 | 0.13229900  | 406.88           | 1055.97 | 1346.04 | 1545.90 | 3132.19       |
|                             | C          | 1.12891300  | 0.66125300  | -0.32485100 | 439.55           | 1066.30 | 1364.54 | 2996.73 | 3134.38       |
|                             | H          | 1.09358000  | 1.19146500  | -1.28200800 | 446.33           | 1081.23 | 1374.75 | 3016.17 | <b>75.67</b>  |
|                             | C          | 2.29113300  | -0.30897600 | -0.23329600 | 482.36           | 1099.15 | 1382.41 | 3028.25 | <b>83.03</b>  |
|                             | H          | 2.10922600  | -1.11793800 | -0.95680600 | 518.09           | 1116.52 | 1385.54 | 3035.03 | <b>233.40</b> |
|                             | C          | 3.59541800  | 0.38594400  | -0.63003300 | 579.53           | 1137.73 | 1388.66 | 3038.38 | <b>274.62</b> |
|                             | H          | 3.83037100  | 1.18471600  | 0.07947200  | 797.86           | 1142.59 | 1403.20 | 3042.34 |               |
|                             | H          | 4.42923700  | -0.31962800 | -0.63411300 | 802.70           | 1169.18 | 1411.83 | 3046.90 |               |
|                             | H          | 3.52008900  | 0.83007100  | -1.62558800 | 831.13           | 1189.19 | 1423.87 | 3052.08 |               |
|                             | C          | 2.41255000  | -0.93287700 | 1.15861000  |                  |         |         |         |               |
|                             | H          | 1.53473900  | -1.52861300 | 1.41849200  |                  |         |         |         |               |
|                             | H          | 3.28750100  | -1.58463300 | 1.21196500  |                  |         |         |         |               |
| H                           | 2.52675800 | -0.15001000 | 1.91496600  |             |                  |         |         |         |               |
| H                           | 1.70374100 | 2.27119900  | 1.19018300  |             |                  |         |         |         |               |
| Rotational constants (GHZ): |            |             |             |             |                  |         |         |         |               |
|                             | 2.65690    | 0.64737     | 0.58955     |             |                  |         |         |         |               |
| TS <sub>6</sub> α'          | C          | -2.06037600 | 1.41222700  | -0.22834200 | 1244.01 <i>i</i> | 851.13  | 1206.18 | 1470.96 | 3051.72       |
|                             | C          | -0.66521400 | 0.93599700  | -0.64318600 | 134.06           | 864.56  | 1218.89 | 1480.44 | 3056.85       |
|                             | C          | -0.23141200 | -0.30568200 | 0.11231700  | 171.14           | 907.19  | 1254.11 | 1481.37 | 3078.32       |
|                             | C          | -1.27653300 | -1.40812800 | 0.11258400  | 224.23           | 916.06  | 1258.00 | 1489.08 | 3097.07       |
|                             | C          | -2.66316700 | -0.90810800 | 0.52266500  | 263.39           | 935.38  | 1280.93 | 1490.59 | 3099.14       |
|                             | C          | -3.08902000 | 0.28611900  | -0.33180100 | 296.17           | 941.39  | 1300.32 | 1493.92 | 3100.58       |
|                             | H          | -0.66570600 | 0.69768600  | -1.71945900 | 311.21           | 963.58  | 1314.22 | 1497.59 | 3104.17       |
|                             | H          | 0.06028600  | 1.74236600  | -0.50653800 | 331.66           | 980.32  | 1330.34 | 1506.67 | 3115.91       |
|                             | H          | -2.02017500 | 1.76541100  | 0.80880800  | 388.23           | 1001.57 | 1358.84 | 1509.58 | 3120.86       |
|                             | H          | -2.35920800 | 2.26440400  | -0.84412400 | 405.38           | 1051.93 | 1368.43 | 1514.65 | 3129.04       |
|                             | H          | -1.32939800 | -1.83050600 | -0.90287500 | 423.63           | 1072.65 | 1369.51 | 2988.06 | 3135.70       |
|                             | H          | -0.95013900 | -2.21957700 | 0.77143700  | 447.74           | 1086.93 | 1383.27 | 2996.34 | <b>76.00</b>  |
|                             | H          | -3.39116200 | -1.71933700 | 0.44139500  | 454.01           | 1100.59 | 1387.14 | 3002.42 | <b>96.29</b>  |
|                             | H          | -2.63653200 | -0.60492100 | 1.57566000  | 486.74           | 1123.42 | 1396.17 | 3035.85 | <b>234.53</b> |
|                             | H          | -3.17827000 | -0.02931500 | -1.37898100 |                  |         |         |         |               |
|                             | H          | -4.07453600 | 0.64335900  | -0.02181100 |                  |         |         |         |               |

|                    |                             |             |             |             |                  |         |         |         |               |
|--------------------|-----------------------------|-------------|-------------|-------------|------------------|---------|---------|---------|---------------|
|                    | H                           | -0.21854300 | 0.05067100  | 1.37722200  | 591.25           | 1138.33 | 1402.97 | 3036.68 | <b>275.40</b> |
|                    | C                           | 1.16490700  | -0.82109600 | -0.18197100 | 777.39           | 1151.44 | 1407.54 | 3047.65 |               |
|                    | H                           | 1.42367600  | -1.57576300 | 0.57354800  | 792.83           | 1159.47 | 1424.94 | 3048.86 |               |
|                    | H                           | 1.12679800  | -1.35821500 | -1.14234000 | 830.78           | 1201.01 | 1465.17 | 3049.96 |               |
|                    | C                           | 2.29601700  | 0.21191700  | -0.24814500 |                  |         |         |         |               |
|                    | H                           | 2.07480800  | 0.91696800  | -1.05792200 |                  |         |         |         |               |
|                    | C                           | 2.43304200  | 0.99615200  | 1.05720600  |                  |         |         |         |               |
|                    | H                           | 2.59315900  | 0.31138800  | 1.89657000  |                  |         |         |         |               |
|                    | H                           | 3.28628300  | 1.67747000  | 1.01049900  |                  |         |         |         |               |
|                    | H                           | 1.54202000  | 1.58551700  | 1.28294000  |                  |         |         |         |               |
|                    | C                           | 3.61236200  | -0.48957000 | -0.58635300 |                  |         |         |         |               |
|                    | H                           | 3.53786200  | -1.04745700 | -1.52319300 |                  |         |         |         |               |
|                    | H                           | 4.42835400  | 0.23035600  | -0.68370600 |                  |         |         |         |               |
|                    | H                           | 3.88196700  | -1.19598000 | 0.20517500  |                  |         |         |         |               |
|                    | H                           | -0.25517600 | 0.23650400  | 2.32785500  |                  |         |         |         |               |
|                    | Rotational constants (GHZ): |             |             |             |                  |         |         |         |               |
|                    |                             | 2.65931     | 0.65126     | 0.59601     |                  |         |         |         |               |
|                    | C                           | -2.06334100 | 1.42935200  | -0.27555400 |                  |         |         |         |               |
|                    | C                           | -0.66310400 | 0.92850600  | -0.63697200 |                  |         |         |         |               |
|                    | C                           | -0.19987900 | -0.19789400 | 0.29634000  |                  |         |         |         |               |
|                    | C                           | -1.24956800 | -1.28883500 | 0.36779400  |                  |         |         |         |               |
|                    | C                           | -2.66467400 | -0.83692400 | 0.64663300  |                  |         |         |         |               |
|                    | C                           | -3.08325400 | 0.29057000  | -0.30098500 |                  |         |         |         |               |
|                    | H                           | -0.66420900 | 0.54878800  | -1.66744700 | 1288.44 <i>i</i> | 852.41  | 1204.47 | 1476.08 | 3052.10       |
|                    | H                           | 0.04811900  | 1.75839500  | -0.60430400 | 131.85           | 869.53  | 1211.83 | 1480.94 | 3070.66       |
|                    | H                           | -2.03954700 | 1.87110200  | 0.72872800  | 167.75           | 906.27  | 1222.60 | 1487.71 | 3090.14       |
|                    | H                           | -2.36546500 | 2.22386400  | -0.96295100 | 211.66           | 919.24  | 1251.15 | 1490.89 | 3097.63       |
|                    | H                           | -1.30075500 | -1.78125700 | -0.88381300 | 287.92           | 934.48  | 1272.55 | 1493.72 | 3099.14       |
|                    | H                           | -0.93310100 | -2.16884200 | 0.93163300  | 293.88           | 939.14  | 1293.01 | 1498.89 | 3104.56       |
|                    | H                           | -3.35336800 | -1.68279800 | 0.56888500  | 314.41           | 964.82  | 1310.46 | 1503.24 | 3110.02       |
|                    | H                           | -2.72537700 | -0.47633200 | 1.68430600  | 321.83           | 980.20  | 1331.81 | 1509.29 | 3114.36       |
|                    | H                           | -3.15135000 | -0.10769900 | -1.31991300 | 341.13           | 999.95  | 1343.03 | 1516.79 | 3120.28       |
|                    | H                           | -4.07680900 | 0.65850700  | -0.03274500 | 408.24           | 1054.40 | 1359.75 | 1557.48 | 3127.94       |
|                    | H                           | -0.11141200 | 0.22556100  | 1.31093000  | 433.26           | 1064.61 | 1366.55 | 2973.89 | 3129.73       |
|                    | C                           | 1.15726500  | -0.78467500 | -0.10737000 | 457.08           | 1077.29 | 1373.84 | 3006.55 | <b>70.69</b>  |
|                    | H                           | 1.43765400  | -1.55209400 | 0.62684900  | 482.65           | 1097.48 | 1381.70 | 3022.66 | <b>82.65</b>  |
|                    | H                           | 1.03684300  | -1.30370900 | -1.06660800 | 517.43           | 1116.25 | 1388.99 | 3032.52 | <b>235.30</b> |
|                    | C                           | 2.31583300  | 0.21245000  | -0.22793500 | 593.57           | 1128.93 | 1399.56 | 3039.52 | <b>257.72</b> |
|                    | H                           | 2.09200400  | 0.90754200  | -1.04532600 | 791.79           | 1154.04 | 1404.00 | 3044.18 |               |
|                    | C                           | 2.51063600  | 1.02189100  | 1.05466200  | 806.66           | 1166.55 | 1409.36 | 3046.44 |               |
|                    | H                           | 2.66012900  | 0.35179400  | 1.90813600  | 830.84           | 1202.31 | 1422.47 | 3051.58 |               |
|                    | H                           | 3.38978600  | 1.66632700  | 0.97793300  |                  |         |         |         |               |
|                    | H                           | 1.65009200  | 1.65805800  | 1.27453100  |                  |         |         |         |               |
|                    | C                           | 3.60206300  | -0.53241700 | -0.58759800 |                  |         |         |         |               |
|                    | H                           | 3.47834200  | -1.11859000 | -1.50158100 |                  |         |         |         |               |
|                    | H                           | 4.43231900  | 0.16166900  | -0.73868600 |                  |         |         |         |               |
|                    | H                           | 3.88201100  | -1.22012300 | 0.21683000  |                  |         |         |         |               |
|                    | H                           | -1.35777300 | -2.07230700 | -1.77948200 |                  |         |         |         |               |
|                    | Rotational constants (GHZ): |             |             |             |                  |         |         |         |               |
| TS <sub>6</sub> β' |                             |             |             |             |                  |         |         |         |               |

|                    |                             |             |             |             |          |         |         |         |               |
|--------------------|-----------------------------|-------------|-------------|-------------|----------|---------|---------|---------|---------------|
|                    | 2.65289                     | 0.64493     | 0.59235     |             |          |         |         |         |               |
| TS <sub>6</sub> γ' | C                           | -2.04012400 | 1.42175400  | -0.22702600 |          |         |         |         |               |
|                    | C                           | -0.65022900 | 0.94233600  | -0.65141200 |          |         |         |         |               |
|                    | C                           | -0.19380400 | -0.26908200 | 0.16843700  |          |         |         |         |               |
|                    | C                           | -1.22613700 | -1.39959300 | 0.05775200  |          |         |         |         |               |
|                    | C                           | -2.62777400 | -0.93925700 | 0.38499800  |          |         |         |         |               |
|                    | C                           | -3.07899600 | 0.30412400  | -0.34635200 |          |         |         |         |               |
|                    | H                           | -0.66210300 | 0.66586100  | -1.71527600 | 1289.59i | 849.81  | 1201.84 | 1469.39 | 3050.44       |
|                    | H                           | 0.06643800  | 1.76177800  | -0.54673400 | 130.73   | 864.20  | 1219.64 | 1476.31 | 3064.70       |
|                    | H                           | -1.99771400 | 1.75691000  | 0.81590300  | 168.35   | 906.44  | 1230.25 | 1480.69 | 3079.64       |
|                    | H                           | -2.34449200 | 2.28325800  | -0.82677300 | 199.34   | 923.01  | 1249.58 | 1489.99 | 3090.46       |
|                    | H                           | -1.21200100 | -1.78694100 | -0.97360800 | 254.25   | 931.40  | 1273.16 | 1493.31 | 3096.81       |
|                    | H                           | -0.93797900 | -2.23328700 | 0.70618100  | 285.42   | 936.56  | 1299.04 | 1497.92 | 3102.32       |
|                    | H                           | -3.36825400 | -1.73920900 | 0.42070800  | 300.45   | 966.10  | 1305.70 | 1499.80 | 3114.41       |
|                    | H                           | -2.57408000 | -0.57501200 | 1.67194100  | 312.73   | 979.55  | 1330.76 | 1509.34 | 3119.87       |
|                    | H                           | -3.22165400 | 0.05697400  | -1.40899500 | 355.89   | 999.05  | 1349.71 | 1516.04 | 3122.75       |
|                    | H                           | -4.04976400 | 0.63721900  | 0.03095700  | 410.04   | 1053.63 | 1361.06 | 1549.39 | 3128.31       |
|                    | C                           | 1.18820700  | -0.77906800 | -0.24842500 | 427.08   | 1063.31 | 1367.23 | 2992.12 | 3130.68       |
|                    | H                           | 1.45506100  | -1.62823900 | 0.39552500  | 454.06   | 1078.89 | 1372.79 | 3005.55 | <b>68.37</b>  |
|                    | H                           | 1.11930300  | -1.17772900 | -1.26935500 | 460.66   | 1101.41 | 1380.62 | 3017.58 | <b>78.86</b>  |
|                    | C                           | 2.33365300  | 0.23981100  | -0.19764300 | 506.24   | 1120.52 | 1390.07 | 3020.07 | <b>236.81</b> |
|                    | H                           | 2.13724700  | 1.02115800  | -0.94090300 | 613.23   | 1131.52 | 1401.12 | 3035.08 | <b>254.25</b> |
|                    | C                           | 2.45063500  | 0.89993900  | 1.17657200  | 790.25   | 1153.37 | 1404.84 | 3043.66 |               |
|                    | H                           | 2.56823800  | 0.13879000  | 1.95531200  | 811.44   | 1158.65 | 1412.04 | 3046.05 |               |
|                    | H                           | 3.32140600  | 1.55882000  | 1.21839200  | 829.74   | 1197.40 | 1422.56 | 3049.80 |               |
|                    | C                           | 3.64940300  | -0.44206300 | -0.57498100 |          |         |         |         |               |
|                    | H                           | 3.58055300  | -0.92369400 | -1.55370500 |          |         |         |         |               |
|                    | H                           | 4.47250400  | 0.27585500  | -0.60695900 |          |         |         |         |               |
|                    | H                           | 3.90437100  | -1.21176200 | 0.16048900  |          |         |         |         |               |
|                    | H                           | -2.49817600 | -0.28367100 | 2.56942900  |          |         |         |         |               |
|                    | Rotational constants (GHZ): |             |             |             |          |         |         |         |               |
|                    | 2.65311                     | 0.64137     | 0.59305     |             |          |         |         |         |               |

|  |                             |             |             |             |                  |         |         |         |               |
|--|-----------------------------|-------------|-------------|-------------|------------------|---------|---------|---------|---------------|
|  | C                           | 2.03196600  | 1.43323900  | 0.16452300  |                  |         |         |         |               |
|  | C                           | 0.65348300  | 0.92736600  | 0.60108900  |                  |         |         |         |               |
|  | C                           | 0.18304700  | -0.25887000 | -0.24729100 |                  |         |         |         |               |
|  | C                           | 1.22579200  | -1.38131700 | -0.19263400 |                  |         |         |         |               |
|  | C                           | 2.60822000  | -0.91078100 | -0.65070900 |                  |         |         |         |               |
|  | C                           | 3.04923200  | 0.31728600  | 0.11161500  |                  |         |         |         |               |
|  | H                           | 0.69871000  | 0.60982900  | 1.65135900  | 1307.47 <i>i</i> | 852.94  | 1206.39 | 1471.80 | 3050.17       |
|  | H                           | -0.06678400 | 1.74822200  | 0.54755000  | 130.73           | 865.06  | 1217.99 | 1478.37 | 3065.76       |
|  | H                           | 1.94716400  | 1.88017900  | -0.83748300 | 160.08           | 913.39  | 1229.60 | 1481.93 | 3089.67       |
|  | H                           | 2.37514200  | 2.22897200  | 0.83153200  | 220.94           | 920.63  | 1230.48 | 1484.94 | 3090.20       |
|  | H                           | 1.29628600  | -1.74295600 | 0.84120500  | 260.50           | 933.96  | 1281.44 | 1493.97 | 3091.45       |
|  | H                           | 0.89448100  | -2.22656000 | -0.80354000 | 279.97           | 944.01  | 1298.30 | 1498.34 | 3100.06       |
|  | H                           | 3.34330200  | -1.71257100 | -0.53828200 | 298.84           | 962.59  | 1309.11 | 1500.35 | 3113.94       |
|  | H                           | 2.57039000  | -0.66752600 | -1.72299900 | 314.23           | 978.35  | 1328.38 | 1509.23 | 3119.47       |
|  | H                           | 4.06838900  | 0.64265700  | -0.10013800 | 351.46           | 998.44  | 1348.47 | 1516.91 | 3123.97       |
|  | H                           | 0.11007600  | 0.07617200  | -1.29182100 | 408.21           | 1052.44 | 1357.55 | 1552.39 | 3127.98       |
|  | C                           | -1.18365400 | -0.78932900 | 0.19564500  | 430.73           | 1061.39 | 1370.60 | 3002.55 | 3129.76       |
|  | H                           | -1.47014000 | -1.61284200 | -0.47257400 | 452.47           | 1086.52 | 1375.45 | 3007.17 | <b>69.11</b>  |
|  | H                           | -1.07716000 | -1.22880900 | 1.19615200  | 460.79           | 1095.48 | 1383.77 | 3016.35 | <b>78.24</b>  |
|  | C                           | -2.33347100 | 0.22522300  | 0.22623400  | 521.07           | 1120.23 | 1387.11 | 3019.16 | <b>236.30</b> |
|  | H                           | -2.11408800 | 0.97688600  | 0.99319900  | 609.88           | 1128.94 | 1401.64 | 3035.60 | <b>266.97</b> |
|  | C                           | -2.50056900 | 0.93970700  | -1.11519200 | 788.95           | 1155.04 | 1405.36 | 3041.25 |               |
|  | H                           | -2.64436400 | 0.21001500  | -1.91933000 | 797.10           | 1159.06 | 1412.23 | 3043.98 |               |
|  | H                           | -3.37349700 | 1.59688600  | -1.09998300 | 833.74           | 1201.78 | 1422.27 | 3045.68 |               |
|  | H                           | -1.62925800 | 1.54860500  | -1.36729000 |                  |         |         |         |               |
|  | C                           | -3.63297100 | -0.47753300 | 0.62082400  |                  |         |         |         |               |
|  | H                           | -3.52850400 | -0.99669700 | 1.57686700  |                  |         |         |         |               |
|  | H                           | -4.45733100 | 0.23422500  | 0.70908200  |                  |         |         |         |               |
|  | H                           | -3.90991400 | -1.21934900 | -0.13510000 |                  |         |         |         |               |
|  | H                           | 3.16351900  | -0.09623700 | 1.38112300  |                  |         |         |         |               |
|  | H                           | 3.19712700  | -0.39904400 | 2.27584900  |                  |         |         |         |               |
|  | Rotational constants (GHZ): |             |             |             |                  |         |         |         |               |
|  |                             | 2.65892     | 0.64096     | 0.59140     |                  |         |         |         |               |

TS<sub>6</sub>δ'

Table S4. The optimized Cartesian coordinate, frequencies and rotational constants for products (alkyl cyclohexyl radicals).

|     | Cartesian coordinates and rotational constants |             |             | frequencies |         |                 |
|-----|------------------------------------------------|-------------|-------------|-------------|---------|-----------------|
| MP1 | C                                              | -1.13542700 | 1.26149700  | 0.21574600  |         |                 |
|     | C                                              | 0.34047100  | 1.26036600  | -0.18647400 | 122.57  | 1100.68 1507.89 |
|     | C                                              | 1.06275600  | 0.00000000  | 0.31228900  | 161.21  | 1100.98 2938.99 |
|     | C                                              | 0.34047000  | -1.26036800 | -0.18646000 | 239.44  | 1138.82 3034.13 |
|     | C                                              | -1.13542900 | -1.26149400 | 0.21575800  | 317.91  | 1164.70 3037.00 |
|     | C                                              | -1.84360500 | 0.00000000  | -0.28352800 | 331.94  | 1230.74 3038.96 |
|     | H                                              | 0.42342400  | 1.29611900  | -1.28019800 | 408.61  | 1247.32 3041.82 |
|     | H                                              | 0.84450300  | 2.15139300  | 0.20039800  | 421.27  | 1288.94 3046.73 |
|     | H                                              | -1.21045600 | 1.30702300  | 1.30916600  | 450.31  | 1295.26 3087.85 |
|     | H                                              | -1.63097700 | 2.15506200  | -0.17303000 | 490.39  | 1316.65 3089.88 |
|     | H                                              | 0.42342300  | -1.29613300 | -1.28018300 | 559.65  | 1330.47 3096.56 |
|     | H                                              | 0.84449900  | -2.15139200 | 0.20042400  | 794.51  | 1363.86 3097.29 |
|     | H                                              | -1.63097900 | -2.15506100 | -0.17301100 | 796.34  | 1371.41 3101.54 |
|     | H                                              | -1.21046000 | -1.30701000 | 1.30917800  | 862.09  | 1385.72 3156.50 |
|     | H                                              | -1.84464700 | -0.00000500 | -1.38041100 | 882.79  | 1386.26 3261.01 |
|     | H                                              | -2.88943000 | 0.00000200  | 0.03510800  | 892.45  | 1396.87         |
|     | H                                              | 0.98794000  | 0.00001100  | 1.41534000  | 916.54  | 1463.89         |
|     | C                                              | 2.50126600  | 0.00000000  | -0.07239100 | 977.74  | 1482.22         |
|     | H                                              | 3.05510400  | 0.92859100  | -0.13606700 | 990.63  | 1486.85         |
|     | H                                              | 3.05503800  | -0.92861100 | -0.13635000 | 1054.31 | 1488.95         |
|     | Rotational constants (GHZ):                    |             |             | 1076.82     | 1493.96 |                 |
|     | 4.26114                                        | 2.29808     | 1.63838     |             |         |                 |
| MP2 | C                                              | 1.16058500  | 1.25825300  | -0.26316400 |         |                 |
|     | C                                              | -0.29812500 | 1.27604500  | 0.21035600  | 95.57   | 1106.09 1503.76 |
|     | C                                              | -1.01704200 | -0.00005600 | -0.10371700 | 134.89  | 1118.93 2940.27 |
|     | C                                              | -0.29807200 | -1.27611100 | 0.21035400  | 214.42  | 1175.51 2943.83 |
|     | C                                              | 1.16064000  | -1.25820300 | -0.26317600 | 271.49  | 1194.50 2979.06 |
|     | C                                              | 1.87954500  | 0.00003600  | 0.22517000  | 335.75  | 1263.13 3036.15 |
|     | H                                              | -0.30624200 | 1.43528500  | 1.30451900  | 367.61  | 1283.43 3049.59 |
|     | H                                              | -0.83237400 | 2.12748900  | -0.22250300 | 416.47  | 1302.02 3051.34 |
|     | H                                              | 1.17986300  | 1.27780200  | -1.35859200 | 447.08  | 1314.49 3076.74 |
|     | H                                              | 1.67776600  | 2.15615200  | 0.08530000  | 547.79  | 1359.77 3077.14 |
|     | H                                              | -0.30619300 | -1.43535700 | 1.30451600  | 747.92  | 1367.74 3079.87 |
|     | H                                              | -0.83224700 | -2.12759600 | -0.22251300 | 788.79  | 1378.32 3097.48 |
|     | H                                              | 1.67787300  | -2.15608400 | 0.08525600  | 851.46  | 1387.03 3099.07 |
|     | H                                              | 1.17990800  | -1.27771700 | -1.35860500 | 861.41  | 1406.40 3102.76 |
|     | H                                              | 1.90460300  | 0.00002900  | 1.32236100  | 902.89  | 1412.52 3123.71 |
|     | H                                              | 2.91789500  | 0.00006100  | -0.11692600 | 926.78  | 1466.34         |
|     | C                                              | -2.50917100 | 0.00000900  | -0.10551500 | 970.41  | 1474.89         |
|     | H                                              | -2.91068000 | 0.00002000  | 0.92102700  | 1000.44 | 1483.01         |
|     | H                                              | -2.91011200 | 0.88704900  | -0.60284100 | 1002.31 | 1487.00         |
|     | H                                              | -2.91021200 | -0.88697400 | -0.60286000 | 1051.76 | 1491.03         |
|     | Rotational constants (GHZ):                    |             |             | 1094.52     | 1491.28 |                 |
|     | 4.25331                                        | 2.22686     | 1.59261     |             |         |                 |

|     |                             |             |             |             |         |         |         |
|-----|-----------------------------|-------------|-------------|-------------|---------|---------|---------|
| MP3 | C                           | -1.20204800 | 1.28908900  | 0.14732100  |         |         |         |
|     | C                           | 0.27370200  | 1.24667700  | -0.07742200 | 127.42  | 1095.56 | 1503.85 |
|     | C                           | 1.03407300  | 0.02721800  | 0.33795900  | 192.22  | 1117.27 | 2939.91 |
|     | C                           | 0.31148300  | -1.24064200 | -0.14938900 | 239.20  | 1142.34 | 2962.28 |
|     | C                           | -1.16983300 | -1.23276100 | 0.23124600  | 307.53  | 1176.14 | 3034.58 |
|     | C                           | -1.87707300 | -0.00256800 | -0.33973400 | 325.17  | 1231.93 | 3039.45 |
|     | H                           | 0.81674600  | 2.16167300  | -0.28821100 | 341.46  | 1264.59 | 3051.65 |
|     | H                           | -1.40821500 | 1.39452200  | 1.22639500  | 415.48  | 1279.84 | 3052.35 |
|     | H                           | -1.64420100 | 2.16282400  | -0.33698300 | 448.60  | 1317.46 | 3088.04 |
|     | H                           | 0.40418200  | -1.29344700 | -1.24160100 | 504.10  | 1326.01 | 3096.03 |
|     | H                           | 0.80995900  | -2.12484400 | 0.25998000  | 598.06  | 1355.61 | 3098.35 |
|     | H                           | -1.65432900 | -2.14618300 | -0.12399800 | 785.67  | 1359.15 | 3102.95 |
|     | H                           | -1.26267200 | -1.22836200 | 1.32461600  | 822.14  | 1373.61 | 3123.91 |
|     | H                           | -1.83070300 | -0.03824600 | -1.43381800 | 871.21  | 1386.33 | 3130.24 |
|     | H                           | -2.93369000 | -0.00199800 | -0.05919600 | 885.21  | 1409.05 | 3188.48 |
|     | H                           | 1.03784800  | -0.01642000 | 1.44250300  | 909.29  | 1418.26 |         |
|     | C                           | 2.48265800  | 0.06431200  | -0.14308700 | 975.51  | 1473.38 |         |
|     | H                           | 2.51541200  | 0.10249800  | -1.23573200 | 987.32  | 1484.83 |         |
|     | H                           | 3.00356400  | 0.94439600  | 0.24163400  | 1001.13 | 1490.38 |         |
|     | H                           | 3.02832400  | -0.82437000 | 0.18304300  | 1069.55 | 1498.77 |         |
|     | Rotational constants (GHZ): |             |             |             | 1091.95 | 1502.12 |         |
|     | 4.36080                     | 2.21178     | 1.60920     |             |         |         |         |
| MP4 | C                           | 1.14384400  | 1.29353800  | -0.16715700 |         |         |         |
|     | C                           | -0.32267300 | 1.28772000  | 0.11215900  | 147.56  | 1112.10 | 1502.78 |
|     | C                           | -0.99362200 | -0.02003100 | -0.34464700 | 174.17  | 1117.89 | 2945.62 |
|     | C                           | -0.21856000 | -1.22219900 | 0.20304100  | 236.82  | 1127.98 | 2960.27 |
|     | C                           | 1.24827600  | -1.20201700 | -0.22971400 | 281.89  | 1167.59 | 3021.02 |
|     | C                           | 1.93809600  | 0.09259200  | 0.22829300  | 311.25  | 1237.31 | 3035.20 |
|     | H                           | -0.49584700 | 1.38335200  | 1.19979500  | 364.76  | 1268.27 | 3048.50 |
|     | H                           | -0.81459500 | 2.14655500  | -0.35300600 | 417.36  | 1287.85 | 3051.43 |
|     | H                           | 1.64619300  | 2.22254000  | -0.40611200 | 435.29  | 1314.47 | 3084.07 |
|     | H                           | -0.27595300 | -1.20710800 | 1.30040800  | 474.13  | 1333.40 | 3088.10 |
|     | H                           | -0.69763500 | -2.14999800 | -0.12531300 | 616.70  | 1358.74 | 3099.82 |
|     | H                           | 1.77695400  | -2.07066600 | 0.17174300  | 783.52  | 1366.52 | 3101.13 |
|     | H                           | 1.30071500  | -1.26680100 | -1.32208700 | 851.50  | 1369.97 | 3118.00 |
|     | H                           | 2.03259500  | 0.05720800  | 1.32745900  | 854.80  | 1398.17 | 3126.75 |
|     | H                           | 2.95499800  | 0.14904800  | -0.16682900 | 876.64  | 1402.31 | 3204.95 |
|     | H                           | -0.93703600 | -0.05606100 | -1.44036200 | 899.05  | 1410.94 |         |
|     | C                           | -2.45979700 | -0.06149100 | 0.07396500  | 966.70  | 1468.39 |         |
|     | H                           | -2.54662800 | -0.04222200 | 1.16491600  | 985.07  | 1474.23 |         |
|     | H                           | -3.00961900 | 0.79662900  | -0.32110500 | 992.99  | 1488.53 |         |
|     | H                           | -2.94752800 | -0.97114500 | -0.28513800 | 1063.78 | 1497.35 |         |
|     | Rotational constants (GHZ): |             |             |             | 1104.13 | 1501.70 |         |
|     | 4.39315                     | 2.22126     | 1.61101     |             |         |         |         |



|                             |                             |             |             |             |         |         |         |
|-----------------------------|-----------------------------|-------------|-------------|-------------|---------|---------|---------|
| MP5                         | C                           | -1.22822200 | 1.28012000  | 0.15710200  |         |         |         |
|                             | C                           | 0.26303000  | 1.25487000  | -0.21040900 | 136.42  | 1102.12 | 1503.91 |
|                             | C                           | 0.95960200  | 0.00000100  | 0.32471900  | 214.74  | 1123.10 | 2959.32 |
|                             | C                           | 0.26303800  | -1.25487400 | -0.21040700 | 238.84  | 1137.60 | 2961.70 |
|                             | C                           | -1.22821300 | -1.28012000 | 0.15710100  | 244.39  | 1172.51 | 3013.29 |
|                             | C                           | -1.90080600 | 0.00000000  | -0.21507100 | 314.61  | 1241.02 | 3036.83 |
|                             | H                           | 0.36560900  | 1.27147400  | -1.30267400 | 358.95  | 1256.92 | 3041.74 |
|                             | H                           | 0.75975200  | 2.15134400  | 0.17371800  | 427.82  | 1293.34 | 3049.39 |
|                             | H                           | -1.30811200 | 1.43633200  | 1.24685400  | 454.48  | 1318.91 | 3087.07 |
|                             | H                           | -1.72518600 | 2.13271800  | -0.31168600 | 459.73  | 1330.43 | 3089.95 |
|                             | H                           | 0.36562000  | -1.27148600 | -1.30267200 | 637.24  | 1343.40 | 3097.27 |
|                             | H                           | 0.75976200  | -2.15134400 | 0.17372700  | 783.87  | 1371.99 | 3097.27 |
|                             | H                           | -1.72518200 | -2.13271700 | -0.31168300 | 793.87  | 1381.70 | 3118.44 |
|                             | H                           | -1.30809700 | -1.43632900 | 1.24685400  | 879.65  | 1400.45 | 3126.83 |
|                             | H                           | -2.94773500 | -0.00002600 | -0.49223500 | 900.49  | 1404.89 | 3205.01 |
|                             | H                           | 0.86055800  | 0.00000200  | 1.41980800  | 932.35  | 1413.08 |         |
|                             | C                           | 2.44393400  | 0.00000500  | -0.02981700 | 962.78  | 1470.63 |         |
|                             | H                           | 2.57543300  | 0.00000500  | -1.11642800 | 974.87  | 1478.99 |         |
|                             | H                           | 2.94670000  | 0.88484400  | 0.36855100  | 1005.08 | 1482.53 |         |
|                             | H                           | 2.94670500  | -0.88483000 | 0.36855100  | 1040.95 | 1497.21 |         |
|                             | Rotational constants (GHZ): |             |             |             | 1100.63 | 1503.00 |         |
|                             | 4.25718                     | 2.27083     | 1.61428     |             |         |         |         |
| EPI                         | C                           | -2.27443000 | 0.29797800  | 0.21967400  |         |         |         |
|                             | C                           | -1.30626200 | 1.41530500  | -0.17453900 | 101.97  | 1084.60 | 1494.97 |
|                             | C                           | 0.11641100  | 1.10426100  | 0.29474900  | 129.36  | 1094.53 | 1508.77 |
|                             | C                           | 0.60971300  | -0.24632100 | -0.23495400 | 149.32  | 1118.69 | 2976.32 |
|                             | C                           | -0.37014200 | -1.35705600 | 0.15453400  | 218.05  | 1130.69 | 3005.95 |
|                             | C                           | -1.79463300 | -1.05300900 | -0.31476800 | 236.89  | 1174.60 | 3024.18 |
|                             | H                           | 0.80415100  | 1.89817600  | -0.01136700 | 327.43  | 1193.67 | 3030.51 |
|                             | H                           | -1.30867400 | 1.52383100  | -1.26613900 | 368.12  | 1239.71 | 3036.88 |
|                             | H                           | -1.63926200 | 2.37128000  | 0.23858000  | 423.19  | 1276.72 | 3041.41 |
|                             | H                           | -2.33913900 | 0.24869800  | 1.31362800  | 444.97  | 1291.13 | 3045.50 |
|                             | H                           | -3.28037200 | 0.51713400  | -0.14847700 | 449.38  | 1298.88 | 3063.15 |
|                             | H                           | 0.63917500  | -0.18967900 | -1.33339200 | 485.95  | 1312.36 | 3083.41 |
|                             | H                           | -0.03009900 | -2.31334200 | -0.25568800 | 545.67  | 1337.13 | 3091.23 |
|                             | H                           | -0.36412800 | -1.46139300 | 1.24811700  | 789.62  | 1366.97 | 3094.86 |
|                             | H                           | -1.81421700 | -1.03269800 | -1.41131300 | 800.13  | 1373.87 | 3095.37 |
|                             | H                           | -2.47385500 | -1.85031400 | -0.00104600 | 813.71  | 1383.82 | 3099.74 |
|                             | H                           | 0.13822800  | 1.07425300  | 1.39302400  | 860.75  | 1387.54 | 3167.19 |
|                             | C                           | 2.02836100  | -0.56038000 | 0.25976700  | 885.39  | 1388.89 | 3272.97 |
|                             | H                           | 2.28488800  | -1.58272500 | -0.06231200 | 907.62  | 1405.99 |         |
|                             | H                           | 2.02754900  | -0.58474300 | 1.35584300  | 939.31  | 1464.02 |         |
|                             | C                           | 3.05702100  | 0.39836900  | -0.23156600 | 963.95  | 1473.50 |         |
| H                           | 3.04607000                  | 0.71729200  | -1.26692000 | 997.97      | 1483.32 |         |         |
| H                           | 3.91343900                  | 0.66935000  | 0.37007400  | 1056.54     | 1487.34 |         |         |
| Rotational constants (GHZ): |                             |             |             | 1072.73     | 1489.97 |         |         |
|                             | 3.86861                     | 1.34882     | 1.08615     |             |         |         |         |

|                             |                             |             |             |             |            |         |         |
|-----------------------------|-----------------------------|-------------|-------------|-------------|------------|---------|---------|
| EP2                         | C                           | 2.30195600  | 0.29495200  | -0.20731300 |            |         |         |
|                             | C                           | 1.32926100  | 1.41052400  | 0.18017800  | 56.12      | 1087.55 | 1494.76 |
|                             | C                           | -0.08756700 | 1.10173000  | -0.30853300 | 115.51     | 1104.29 | 1508.56 |
|                             | C                           | -0.58828300 | -0.26071100 | 0.22073200  | 139.52     | 1118.85 | 2979.28 |
|                             | C                           | 0.40144700  | -1.36628800 | -0.16382000 | 208.92     | 1162.31 | 2998.41 |
|                             | C                           | 1.81989400  | -1.05837600 | 0.31922200  | 237.55     | 1170.87 | 3030.55 |
|                             | H                           | -0.77775700 | 1.89333000  | -0.00204700 | 304.49     | 1214.65 | 3035.62 |
|                             | H                           | 1.31738600  | 1.51415700  | 1.27216700  | 364.41     | 1253.16 | 3037.51 |
|                             | H                           | 1.66670100  | 2.36845700  | -0.22506200 | 387.57     | 1287.12 | 3041.90 |
|                             | H                           | 2.37711300  | 0.24869800  | -1.30069500 | 434.42     | 1294.29 | 3045.80 |
|                             | H                           | 3.30384800  | 0.51541900  | 0.17090200  | 459.03     | 1308.41 | 3071.76 |
|                             | H                           | -0.60579000 | -0.18413400 | 1.32048700  | 478.76     | 1325.24 | 3090.48 |
|                             | H                           | 0.05642600  | -2.32281000 | 0.23962000  | 544.79     | 1352.27 | 3092.40 |
|                             | H                           | 0.40382200  | -1.46405100 | -1.25761200 | 793.10     | 1368.81 | 3094.33 |
|                             | H                           | 1.83032000  | -1.04154800 | 1.41595300  | 800.30     | 1379.07 | 3095.68 |
|                             | H                           | 2.50414500  | -1.85281400 | 0.00923500  | 857.36     | 1384.72 | 3100.07 |
|                             | H                           | -0.10092000 | 1.07200100  | -1.40580100 | 891.36     | 1386.65 | 3122.31 |
|                             | C                           | -1.97325700 | -0.56013900 | -0.24966600 | 901.49     | 1406.32 | 3179.51 |
|                             | H                           | -2.09640400 | -1.21610700 | -1.10590300 | 932.41     | 1430.10 |         |
|                             | C                           | -3.13008000 | 0.26784300  | 0.19607600  | 937.32     | 1477.98 |         |
|                             | H                           | -3.22569900 | 1.19468300  | -0.38857600 | 986.37     | 1483.44 |         |
|                             | H                           | -4.07529400 | -0.26931200 | 0.09290100  | 1012.59    | 1486.62 |         |
|                             | H                           | -3.01812500 | 0.56682600  | 1.24318300  | 1050.34    | 1489.60 |         |
|                             | Rotational constants (GHZ): |             |             |             | 1065.32    | 1493.93 |         |
|                             |                             | 3.93325     | 1.30545     | 1.05887     |            |         |         |
|                             | EP3                         | C           | 2.25729900  | 0.00019300  | 0.40971700 | 47.68   | 1096.81 |
| C                           |                             | 1.61721000  | -1.25993700 | -0.17490500 | 75.29      | 1101.21 | 1509.13 |
| C                           |                             | 0.10352400  | -1.27389000 | 0.07904300  | 203.97     | 1105.92 | 2945.39 |
| C                           |                             | -0.55112300 | -0.00017600 | -0.36201000 | 211.27     | 1173.34 | 2948.53 |
| C                           |                             | 0.10324000  | 1.27374700  | 0.07886600  | 229.01     | 1196.10 | 3035.57 |
| C                           |                             | 1.61692900  | 1.26010000  | -0.17507600 | 318.83     | 1249.91 | 3042.59 |
| H                           |                             | -0.36278500 | -2.13170200 | -0.41600700 | 363.15     | 1263.37 | 3048.26 |
| H                           |                             | 1.79701300  | -1.28451800 | -1.25551200 | 379.91     | 1287.01 | 3049.89 |
| H                           |                             | 2.07705800  | -2.15589900 | 0.25066000  | 444.23     | 1311.90 | 3057.49 |
| H                           |                             | 2.12472700  | 0.00025200  | 1.49916400  | 468.62     | 1328.35 | 3074.44 |
| H                           |                             | 3.33412500  | 0.00030000  | 0.22064100  | 584.31     | 1337.31 | 3077.04 |
| H                           |                             | -0.36326300 | 2.13138400  | -0.41630600 | 739.67     | 1359.75 | 3083.84 |
| H                           |                             | -0.06029900 | 1.41722900  | 1.16233800  | 784.56     | 1375.90 | 3095.37 |
| H                           |                             | 1.79673000  | 1.28457500  | -1.25568500 | 792.78     | 1375.99 | 3097.60 |
| H                           |                             | 2.07657600  | 2.15622300  | 0.25036900  | 855.93     | 1386.97 | 3101.33 |
| C                           |                             | -2.01261700 | -0.00031500 | -0.67760900 | 856.69     | 1398.00 | 3132.38 |
| H                           |                             | -2.26136700 | -0.88140700 | -1.27876200 | 914.27     | 1409.54 | 3133.30 |
| H                           |                             | -2.26136900 | 0.88031600  | -1.27944200 | 928.41     | 1468.60 |         |
| C                           |                             | -2.88747500 | 0.00019800  | 0.59139000  | 942.09     | 1475.84 |         |
| H                           |                             | -2.68460800 | 0.88426700  | 1.20051700  | 997.19     | 1486.16 |         |
| H                           |                             | -3.94982200 | 0.00013500  | 0.33778400  | 1046.48    | 1487.35 |         |
| H                           |                             | -2.68466700 | -0.88341000 | 1.20120500  | 1050.67    | 1491.51 |         |
| Rotational constants (GHZ): |                             |             |             | 1051.20     | 1502.52    |         |         |
|                             |                             | 3.73654     | 1.33911     | 1.11238     |            |         |         |

|                             |                             |             |             |             |         |         |         |
|-----------------------------|-----------------------------|-------------|-------------|-------------|---------|---------|---------|
| EP4                         | C                           | 2.32121200  | 0.32523700  | -0.23304700 |         |         |         |
|                             | C                           | 1.33580400  | 1.44683800  | 0.15435100  | 50.42   | 1089.97 | 1503.39 |
|                             | C                           | -0.05537500 | 1.07382000  | -0.23696500 | 105.47  | 1101.79 | 1508.33 |
|                             | C                           | -0.57681400 | -0.25025100 | 0.22279200  | 151.32  | 1141.76 | 2958.09 |
|                             | C                           | 0.42958200  | -1.35479900 | -0.16475600 | 202.05  | 1152.34 | 2997.78 |
|                             | C                           | 1.84475700  | -1.02205900 | 0.31387700  | 239.39  | 1164.23 | 3034.63 |
|                             | H                           | -0.58477000 | 1.63157100  | -1.00098000 | 273.04  | 1218.30 | 3039.16 |
|                             | H                           | 1.38999600  | 1.57829700  | 1.24576300  | 333.17  | 1256.59 | 3043.61 |
|                             | H                           | 1.63510800  | 2.39486300  | -0.29669200 | 364.63  | 1264.23 | 3049.47 |
|                             | H                           | 2.38523500  | 0.26973500  | -1.32544600 | 445.10  | 1297.10 | 3059.03 |
|                             | H                           | 3.32235300  | 0.55812500  | 0.14052400  | 457.61  | 1305.22 | 3079.75 |
|                             | H                           | -0.61978800 | -0.24048300 | 1.32625400  | 486.79  | 1326.18 | 3086.56 |
|                             | H                           | 0.09994100  | -2.31200700 | 0.25229100  | 573.65  | 1343.31 | 3094.84 |
|                             | H                           | 0.42785400  | -1.45876000 | -1.25717700 | 773.47  | 1354.93 | 3099.68 |
|                             | H                           | 1.85348600  | -0.98773600 | 1.41050400  | 803.15  | 1368.46 | 3110.07 |
|                             | H                           | 2.53700200  | -1.81481000 | 0.01735400  | 842.02  | 1378.42 | 3128.02 |
|                             | C                           | -1.97965500 | -0.55186900 | -0.30511600 | 865.44  | 1385.06 | 3135.54 |
|                             | H                           | -2.24961600 | -1.57668200 | -0.02958800 | 899.20  | 1415.33 | 3192.86 |
|                             | H                           | -1.95419400 | -0.52020300 | -1.40087100 | 933.84  | 1423.62 |         |
|                             | C                           | -3.03874200 | 0.41443700  | 0.22123600  | 941.88  | 1479.79 |         |
|                             | H                           | -2.81162300 | 1.44484700  | -0.06139300 | 992.42  | 1483.35 |         |
|                             | H                           | -4.02917700 | 0.16987100  | -0.16758500 | 1029.33 | 1489.50 |         |
|                             | H                           | -3.08642300 | 0.37524700  | 1.31282200  | 1038.64 | 1494.16 |         |
| Rotational constants (GHZ): |                             |             |             | 1074.69     | 1501.33 |         |         |
|                             |                             | 3.92949     | 1.31175     | 1.06223     |         |         |         |
| EP5                         | C                           | -2.3604910  | 0.3814510   | 0.1622120   | 90.98   | 1103.38 | 1504.58 |
|                             | C                           | -1.3337040  | 1.4239150   | -0.1321000  | 130.53  | 1120.99 | 1514.85 |
|                             | C                           | 0.0910730   | 1.1398570   | 0.2134070   | 165.91  | 1126.62 | 2938.33 |
|                             | C                           | 0.5360500   | -0.2597430  | -0.2500680  | 214.70  | 1132.81 | 2960.53 |
|                             | C                           | -0.4888560  | -1.3081180  | 0.1951130   | 248.51  | 1162.53 | 3016.12 |
|                             | C                           | -1.8944050  | -0.9996210  | -0.3216640  | 288.68  | 1228.32 | 3026.69 |
|                             | H                           | 0.7427790   | 1.9093870   | -0.2066600  | 360.77  | 1253.33 | 3040.33 |
|                             | H                           | -1.6404830  | 2.4387700   | -0.3527260  | 373.79  | 1276.64 | 3051.82 |
|                             | H                           | -2.5274720  | 0.3216690   | 1.2516320   | 428.75  | 1305.43 | 3058.89 |
|                             | H                           | -3.3227220  | 0.6443540   | -0.2833150  | 461.20  | 1317.90 | 3076.73 |
|                             | H                           | 0.5568710   | -0.2539130  | -1.3491720  | 467.60  | 1326.71 | 3085.87 |
|                             | H                           | -0.1694170  | -2.2986570  | -0.1440110  | 613.21  | 1358.81 | 3099.33 |
|                             | H                           | -0.5050320  | -1.3396740  | 1.2934700   | 764.87  | 1363.89 | 3100.95 |
|                             | H                           | -1.8856550  | -1.0105200  | -1.4171210  | 797.07  | 1375.54 | 3101.97 |
|                             | H                           | -2.5985440  | -1.7697730  | 0.0044720   | 852.72  | 1379.75 | 3128.20 |
|                             | C                           | 1.9357510   | -0.6169130  | 0.2553010   | 861.88  | 1402.84 | 3137.96 |
|                             | H                           | 2.1810030   | -1.6265160  | -0.0913190  | 894.97  | 1406.36 | 3205.53 |
|                             | H                           | 1.9130660   | -0.6641520  | 1.3510360   | 925.39  | 1416.06 |         |
|                             | C                           | 3.0294010   | 0.3509080   | -0.1940320  | 937.82  | 1468.65 |         |
|                             | H                           | 2.9034300   | 1.3382990   | 0.2546060   | 981.83  | 1473.26 |         |
|                             | H                           | 4.0178460   | -0.0148310  | 0.0906230   | 1030.32 | 1485.38 |         |
|                             | H                           | 3.0175360   | 0.4730820   | -1.2808970  | 1057.01 | 1493.00 |         |
|                             | Rotational constants (GHZ): |             |             |             | 1072.44 | 1498.84 |         |
|                             |                             | 3.99211     | 1.31444     | 1.06133     |         |         |         |

|                             |             |             |             |             |         |         |         |
|-----------------------------|-------------|-------------|-------------|-------------|---------|---------|---------|
| EP6                         | C           | 2.3288430   | 0.3295220   | -0.1319140  |         |         |         |
|                             | C           | 1.3761940   | 1.4482410   | 0.1291310   | 80.05   | 1097.65 | 1504.58 |
|                             | C           | -0.0481750  | 1.0993390   | -0.3309200  | 119.09  | 1106.63 | 1515.28 |
|                             | C           | -0.5077770  | -0.2569990  | 0.2148650   | 197.80  | 1126.35 | 2957.64 |
|                             | C           | 0.4808870   | -1.3504660  | -0.2039400  | 211.61  | 1148.60 | 2960.58 |
|                             | C           | 1.9113430   | -1.0473420  | 0.2652610   | 237.73  | 1170.09 | 2999.45 |
|                             | H           | -0.7327200  | 1.8916550   | -0.0175410  | 266.97  | 1231.21 | 3035.89 |
|                             | H           | 1.3404160   | 1.6563220   | 1.2126720   | 353.74  | 1243.17 | 3037.17 |
|                             | H           | 1.7161620   | 2.3704490   | -0.3480400  | 372.86  | 1293.02 | 3043.85 |
|                             | H           | 3.3706990   | 0.5421780   | -0.3374900  | 443.55  | 1293.64 | 3059.50 |
|                             | H           | -0.5039830  | -0.1981850  | 1.3143850   | 449.43  | 1309.25 | 3076.62 |
|                             | H           | 0.1542660   | -2.3178690  | 0.1904160   | 471.36  | 1335.65 | 3088.74 |
|                             | H           | 0.4715120   | -1.4282510  | -1.2982950  | 630.31  | 1345.20 | 3096.68 |
|                             | H           | 1.9368930   | -1.1392440  | 1.3649160   | 762.63  | 1365.97 | 3097.32 |
|                             | H           | 2.6085330   | -1.7945070  | -0.1212800  | 783.03  | 1377.56 | 3103.25 |
|                             | H           | -0.0754100  | 1.0605110   | -1.4275460  | 822.68  | 1391.88 | 3128.16 |
|                             | C           | -1.9266720  | -0.6161690  | -0.2361580  | 881.81  | 1401.38 | 3139.76 |
|                             | H           | -2.1650670  | -1.6168830  | 0.1399030   | 914.01  | 1408.30 | 3202.90 |
|                             | H           | -1.9395420  | -0.6878610  | -1.3306040  | 933.23  | 1416.91 |         |
|                             | C           | -3.0032890  | 0.3637550   | 0.2282080   | 946.70  | 1469.33 |         |
| H                           | -2.8941410  | 1.3410310   | -0.2455900  | 993.99      | 1477.48 |         |         |
| H                           | -4.0008030  | -0.0078390  | -0.0143020  | 1021.37     | 1481.80 |         |         |
| H                           | -2.9549330  | 0.5092120   | 1.3111930   | 1046.37     | 1490.63 |         |         |
| Rotational constants (GHZ): |             |             |             | 1064.08     | 1497.96 |         |         |
|                             |             | 3.84866     | 1.33812     | 1.06690     |         |         |         |
| nP1                         | C           | 2.22087000  | -0.89135100 | 0.53864300  | 61.41   | 1080.15 | 1493.24 |
|                             | C           | 0.89798100  | -1.38460900 | -0.04938300 | 96.14   | 1088.86 | 1495.36 |
|                             | C           | -0.22282000 | -0.34922500 | 0.09608900  | 145.47  | 1102.25 | 1508.67 |
|                             | C           | 0.20551900  | 0.98761300  | -0.51924300 | 176.45  | 1127.12 | 2987.02 |
|                             | C           | 1.53414700  | 1.48209300  | 0.05845500  | 228.87  | 1139.29 | 3012.90 |
|                             | C           | 2.63826000  | 0.43546800  | -0.09814600 | 236.84  | 1172.90 | 3021.58 |
|                             | H           | 1.03882500  | -1.60090100 | -1.11722700 | 310.63  | 1189.73 | 3029.26 |
|                             | H           | 0.59600600  | -2.32417300 | 0.42473100  | 336.03  | 1237.76 | 3036.30 |
|                             | H           | 2.10493300  | -0.75025800 | 1.62019300  | 398.45  | 1241.45 | 3037.63 |
|                             | H           | 3.00120700  | -1.64445700 | 0.39896300  | 437.07  | 1291.12 | 3041.13 |
|                             | H           | 0.30276300  | 0.86132300  | -1.60688600 | 444.78  | 1292.30 | 3044.98 |
|                             | H           | -0.56891800 | 1.74188500  | -0.35185900 | 465.46  | 1304.52 | 3069.37 |
|                             | H           | 1.82648900  | 2.41991900  | -0.42179500 | 503.92  | 1322.93 | 3080.57 |
|                             | H           | 1.39785200  | 1.70139400  | 1.12455100  | 547.15  | 1342.34 | 3087.13 |
|                             | H           | 2.83401800  | 0.27523400  | -1.16565100 | 764.41  | 1365.89 | 3093.48 |
|                             | H           | 3.57037400  | 0.79606600  | 0.34531500  | 797.99  | 1373.69 | 3094.20 |
|                             | H           | -0.38840100 | -0.17925200 | 1.16965400  | 830.93  | 1380.90 | 3095.08 |
|                             | C           | -1.52255600 | -0.88587300 | -0.51166600 | 856.49  | 1385.98 | 3099.13 |
|                             | H           | -1.78840300 | -1.81858900 | 0.00028200  | 865.81  | 1388.37 | 3163.68 |
|                             | H           | -1.34111100 | -1.14818800 | -1.56081900 | 907.93  | 1398.17 | 3268.21 |
| C                           | -2.71586900 | 0.07612600  | -0.43745900 | 911.61      | 1410.91 |         |         |
| H                           | -3.58836600 | -0.42999000 | -0.87891500 | 924.11      | 1465.56 |         |         |
| H                           | -2.53814400 | 0.94987500  | -1.07157300 | 944.74      | 1478.28 |         |         |
| C                           | -3.03208600 | 0.51134700  | 0.95168800  | 991.66      | 1480.74 |         |         |

|             |                             |             |             |             |         |         |         |
|-------------|-----------------------------|-------------|-------------|-------------|---------|---------|---------|
|             | H                           | -3.52487100 | 1.45432400  | 1.14638400  | 1038.60 | 1487.35 |         |
|             | H                           | -2.95493300 | -0.19375200 | 1.77078000  | 1059.38 | 1489.91 |         |
|             | Rotational constants (GHZ): |             |             |             |         |         |         |
|             |                             | 3.09905     | 0.93669     | 0.82091     |         |         |         |
| <i>n</i> P2 | C                           | 1.75800600  | 1.45415400  | -0.16781800 |         |         |         |
|             | C                           | 0.33295100  | 1.07399300  | 0.23894200  | 47.26   | 1075.09 | 1491.42 |
|             | C                           | -0.06390400 | -0.30773000 | -0.29269300 | 82.97   | 1093.31 | 1494.54 |
|             | C                           | 0.95379100  | -1.35902000 | 0.16031300  | 104.06  | 1118.02 | 1508.57 |
|             | C                           | 2.38104900  | -0.98620300 | -0.24631700 | 157.23  | 1130.90 | 2958.70 |
|             | C                           | 2.76364500  | 0.39530800  | 0.28881600  | 189.92  | 1147.96 | 2992.71 |
|             | H                           | 0.26087300  | 1.05584600  | 1.33536400  | 237.50  | 1173.16 | 3004.88 |
|             | H                           | -0.37986800 | 1.82708800  | -0.10946400 | 307.82  | 1198.46 | 3023.09 |
|             | H                           | 1.80680300  | 1.54816100  | -1.25968200 | 326.73  | 1228.92 | 3024.94 |
|             | H                           | 2.02022100  | 2.43189800  | 0.24542200  | 355.82  | 1275.43 | 3033.67 |
|             | H                           | 0.90104500  | -1.44862000 | 1.25394600  | 428.73  | 1290.30 | 3037.01 |
|             | H                           | 0.68453200  | -2.33756900 | -0.24994900 | 447.80  | 1296.37 | 3040.66 |
|             | H                           | 3.08560300  | -1.74215800 | 0.11098500  | 455.97  | 1299.79 | 3045.25 |
|             | H                           | 2.45167100  | -0.97892800 | -1.34095200 | 471.25  | 1336.13 | 3068.89 |
|             | H                           | 2.77833300  | 0.36393800  | 1.38527700  | 568.57  | 1346.46 | 3083.37 |
|             | H                           | 3.77322200  | 0.66275800  | -0.03485200 | 790.73  | 1368.91 | 3091.22 |
|             | H                           | -0.04127000 | -0.26757400 | -1.39204700 | 799.39  | 1383.45 | 3094.45 |
|             | C                           | -1.48409700 | -0.68748600 | 0.13695800  | 840.29  | 1387.19 | 3095.14 |
|             | H                           | -1.53771100 | -0.69217800 | 1.23518000  | 861.29  | 1388.56 | 3099.41 |
|             | H                           | -1.67786000 | -1.73032800 | -0.16865300 | 903.15  | 1401.40 | 3129.65 |
|             | C                           | -2.54504700 | 0.20647300  | -0.41104600 | 916.40  | 1409.85 | 3176.21 |
|             | H                           | -2.40386100 | 0.61084500  | -1.40857300 | 924.27  | 1429.78 |         |
|             | C                           | -3.91072600 | 0.21993100  | 0.18458500  | 946.94  | 1468.37 |         |
|             | H                           | -4.51790400 | 1.03843500  | -0.20533500 | 987.76  | 1481.60 |         |
|             | H                           | -4.45390900 | -0.71484400 | -0.02136300 | 993.11  | 1482.76 |         |
|             | H                           | -3.86392500 | 0.31671300  | 1.27425600  | 1056.37 | 1487.92 |         |
|             | Rotational constants (GHZ): |             |             |             | 1070.71 | 1489.44 |         |
|             |                             | 3.70566     | 0.79851     | 0.69837     |         |         |         |
| <i>n</i> P3 | C                           | -1.59056400 | 1.47438300  | 0.29467000  | 48.19   | 1067.39 | 1500.66 |
|             | C                           | -0.18552400 | 1.01275700  | -0.09804700 | 73.11   | 1090.52 | 1507.28 |
|             | C                           | 0.06917500  | -0.45250200 | 0.32002800  | 129.18  | 1115.62 | 1509.97 |
|             | C                           | -1.01326900 | -1.36027800 | -0.27380200 | 193.12  | 1123.98 | 2970.53 |
|             | C                           | -2.42048100 | -0.89939100 | 0.11011400  | 240.08  | 1159.46 | 3028.74 |
|             | C                           | -2.65843900 | 0.55507100  | -0.30158100 | 251.46  | 1170.99 | 3030.90 |
|             | H                           | -0.06266400 | 1.08670900  | -1.18635800 | 275.86  | 1214.40 | 3035.58 |
|             | H                           | 0.57013700  | 1.66327900  | 0.35318000  | 307.96  | 1243.37 | 3037.74 |
|             | H                           | -1.67877900 | 1.46691400  | 1.38803400  | 364.86  | 1280.74 | 3041.80 |
|             | H                           | -1.75177200 | 2.50623800  | -0.02918900 | 429.79  | 1289.63 | 3046.09 |
|             | H                           | -0.91258300 | -1.34910900 | -1.36720100 | 440.89  | 1293.99 | 3056.43 |
|             | H                           | -0.84490400 | -2.39154700 | 0.05041200  | 461.77  | 1304.11 | 3075.88 |
|             | H                           | -3.16860700 | -1.55169800 | -0.34838000 | 499.33  | 1325.17 | 3089.45 |
|             | H                           | -2.54437600 | -0.98999700 | 1.19621600  | 547.05  | 1334.21 | 3091.36 |
|             | H                           | -2.62417700 | 0.62872600  | -1.39550400 | 769.74  | 1354.35 | 3095.37 |
|             | H                           | -3.65571700 | 0.87959500  | 0.00749300  | 795.93  | 1368.06 | 3096.05 |

|             |                             |             |             |             |         |         |         |
|-------------|-----------------------------|-------------|-------------|-------------|---------|---------|---------|
|             | H                           | -0.02438700 | -0.48462400 | 1.41880100  | 808.54  | 1384.05 | 3100.56 |
|             | C                           | 1.44466300  | -0.90148300 | -0.04822200 | 857.58  | 1385.58 | 3130.54 |
|             | H                           | 1.56712700  | -1.60149700 | -0.87020600 | 894.21  | 1390.05 | 3134.13 |
|             | C                           | 2.66635800  | -0.28227800 | 0.54659800  | 901.12  | 1402.07 | 3169.41 |
|             | H                           | 3.34212800  | -1.06375400 | 0.91560200  | 912.28  | 1436.26 |         |
|             | H                           | 2.38428600  | 0.31921300  | 1.41739500  | 939.51  | 1480.98 |         |
|             | C                           | 3.43942100  | 0.59431800  | -0.45320800 | 982.40  | 1485.77 |         |
|             | H                           | 4.33621300  | 1.01936600  | 0.00387200  | 1030.76 | 1488.18 |         |
|             | H                           | 3.74653100  | 0.00479500  | -1.32011900 | 1050.32 | 1489.53 |         |
|             | H                           | 2.81348900  | 1.41380500  | -0.81334800 | 1055.00 | 1494.47 |         |
|             | Rotational constants (GHZ): |             |             |             |         |         |         |
|             |                             | 3.35262     | 0.86601     | 0.74413     |         |         |         |
| <i>n</i> P4 | C                           | 1.66151600  | -1.35878500 | 0.11122900  |         |         |         |
|             | C                           | 0.57140500  | -1.05573800 | -0.92685200 | 33.45   | 1081.82 | 1502.64 |
|             | C                           | -0.17315000 | 0.20278200  | -0.60857100 | 44.91   | 1096.71 | 1504.82 |
|             | C                           | 0.64014400  | 1.40213800  | -0.23220900 | 107.32  | 1103.34 | 1508.40 |
|             | C                           | 1.72570700  | 1.06499200  | 0.79889500  | 179.77  | 1109.65 | 2945.05 |
|             | C                           | 2.55354400  | -0.13830400 | 0.34450500  | 216.67  | 1173.37 | 2948.17 |
|             | H                           | 1.05605200  | -0.95969900 | -1.91533200 | 254.67  | 1192.86 | 3014.03 |
|             | H                           | -0.12413900 | -1.89672300 | -1.00777900 | 295.17  | 1226.15 | 3035.23 |
|             | H                           | 1.18362700  | -1.63773800 | 1.05749000  | 359.94  | 1255.75 | 3046.16 |
|             | H                           | 2.25981600  | -2.21449100 | -0.21315000 | 375.07  | 1282.60 | 3048.29 |
|             | H                           | 1.13407500  | 1.80504900  | -1.13480400 | 406.07  | 1285.31 | 3050.22 |
|             | H                           | -0.00862100 | 2.20096300  | 0.14100200  | 441.94  | 1307.90 | 3052.72 |
|             | H                           | 2.36977900  | 1.93281300  | 0.96481600  | 467.50  | 1317.77 | 3068.90 |
|             | H                           | 1.24575200  | 0.82852200  | 1.75561600  | 545.66  | 1355.12 | 3076.74 |
|             | H                           | 3.07347300  | 0.11311700  | -0.58869900 | 727.14  | 1359.60 | 3080.61 |
|             | H                           | 3.32390400  | -0.36941900 | 1.08504600  | 790.72  | 1363.89 | 3090.12 |
|             | C                           | -1.60861100 | 0.38147300  | -0.99188300 | 796.07  | 1375.45 | 3095.90 |
|             | H                           | -1.93618000 | -0.45081100 | -1.62545400 | 851.76  | 1380.20 | 3096.93 |
|             | H                           | -1.72530500 | 1.29819700  | -1.58593600 | 854.21  | 1387.15 | 3100.41 |
|             | C                           | -2.54396700 | 0.46735400  | 0.22986400  | 865.26  | 1409.34 | 3122.22 |
|             | H                           | -3.55651200 | 0.70701100  | -0.10919100 | 890.37  | 1415.43 | 3132.56 |
|             | H                           | -2.22077500 | 1.29710700  | 0.86749500  | 923.97  | 1466.29 |         |
|             | C                           | -2.55898600 | -0.82739000 | 1.03859700  | 930.64  | 1474.55 |         |
|             | H                           | -3.23068100 | -0.75609700 | 1.89636200  | 985.56  | 1484.51 |         |
|             | H                           | -2.89153200 | -1.66625400 | 0.42018200  | 1038.18 | 1486.37 |         |
|             | H                           | -1.55833200 | -1.06268100 | 1.41088200  | 1051.83 | 1490.98 |         |
|             | Rotational constants (GHZ): |             |             |             | 1061.99 | 1491.18 |         |
|             |                             | 2.60265     | 1.00892     | 0.92565     |         |         |         |

|                             |             |             |             |             |         |         |         |
|-----------------------------|-------------|-------------|-------------|-------------|---------|---------|---------|
| nP5                         | C           | -1.85712600 | 1.45077500  | 0.14020200  |         |         |         |
|                             | C           | -0.45504000 | 1.07412300  | -0.20629600 | 58.58   | 1075.36 | 1501.15 |
|                             | C           | 0.04540100  | -0.25304600 | 0.26834200  | 77.29   | 1099.97 | 1504.63 |
|                             | C           | -0.95073000 | -1.35287100 | -0.15899300 | 92.79   | 1108.46 | 1511.98 |
|                             | C           | -2.38068400 | -1.01674100 | 0.27077600  | 147.32  | 1143.32 | 2962.27 |
|                             | C           | -2.83276900 | 0.33470200  | -0.28663700 | 192.89  | 1152.79 | 2999.79 |
|                             | H           | 0.09162200  | 1.61828800  | -0.96821900 | 246.23  | 1162.98 | 3027.65 |
|                             | H           | -1.94749600 | 1.57622500  | 1.22974100  | 274.81  | 1215.37 | 3035.33 |
|                             | H           | -2.13769800 | 2.40224700  | -0.31560500 | 299.34  | 1243.82 | 3039.20 |
|                             | H           | -0.91081800 | -1.45263500 | -1.25105400 | 328.17  | 1261.63 | 3049.50 |
|                             | H           | -0.63923600 | -2.31278500 | 0.26565200  | 356.19  | 1287.07 | 3051.16 |
|                             | H           | -3.06488900 | -1.80563200 | -0.05344700 | 450.39  | 1294.57 | 3055.63 |
|                             | H           | -2.42805100 | -0.98703800 | 1.36654500  | 466.68  | 1313.98 | 3064.18 |
|                             | H           | -2.85857200 | 0.28419100  | -1.38086400 | 511.65  | 1330.93 | 3085.41 |
|                             | H           | -3.84553000 | 0.56997600  | 0.05257200  | 588.26  | 1340.59 | 3091.19 |
|                             | H           | 0.04741300  | -0.24679300 | 1.37240100  | 741.86  | 1346.42 | 3094.74 |
|                             | C           | 1.46443700  | -0.55794900 | -0.21001100 | 801.99  | 1354.63 | 3099.67 |
|                             | H           | 1.48347100  | -0.51578700 | -1.30705400 | 837.93  | 1367.96 | 3110.21 |
|                             | H           | 1.72311900  | -1.58751100 | 0.06487000  | 857.72  | 1384.48 | 3124.76 |
|                             | C           | 2.51989100  | 0.39017100  | 0.35658900  | 874.80  | 1402.66 | 3132.83 |
|                             | H           | 2.49255300  | 0.33909500  | 1.45063500  | 904.60  | 1413.61 | 3189.87 |
|                             | H           | 2.26637500  | 1.42158700  | 0.09231700  | 921.83  | 1424.36 |         |
|                             | C           | 3.92514800  | 0.06076900  | -0.14097200 | 945.13  | 1479.60 |         |
|                             | H           | 4.66928400  | 0.74221700  | 0.27597100  | 973.30  | 1482.44 |         |
|                             | H           | 4.20896400  | -0.95746200 | 0.13809800  | 1038.74 | 1488.94 |         |
| H                           | 3.97832500  | 0.13221700  | -1.23055300 | 1048.35     | 1490.88 |         |         |
| Rotational constants (GHZ): |             |             |             | 1065.71     | 1496.97 |         |         |
|                             |             | 3.81907     | 0.78000     | 0.68544     |         |         |         |
| nP6                         | C           | 1.89307800  | 1.40541300  | -0.11634600 | 74.58   | 1091.11 | 1498.93 |
|                             | C           | 0.45374100  | 1.15697100  | 0.19447300  | 83.38   | 1104.77 | 1504.83 |
|                             | C           | -0.01543900 | -0.23085100 | -0.28100600 | 131.15  | 1125.42 | 1512.13 |
|                             | C           | 0.97281800  | -1.30475300 | 0.18648900  | 165.50  | 1128.51 | 2937.93 |
|                             | C           | 2.39708400  | -1.03109700 | -0.29718800 | 176.46  | 1133.76 | 2960.52 |
|                             | C           | 2.88629000  | 0.33720300  | 0.19996600  | 248.00  | 1162.32 | 3016.96 |
|                             | H           | 0.29163100  | 1.20202000  | 1.28788000  | 284.65  | 1223.52 | 3022.30 |
|                             | H           | -0.16829700 | 1.94284600  | -0.24012800 | 298.16  | 1245.02 | 3030.82 |
|                             | H           | 2.23027700  | 2.41268800  | -0.32719500 | 351.66  | 1270.78 | 3049.23 |
|                             | H           | 0.96281200  | -1.33727700 | 1.28487500  | 369.04  | 1294.63 | 3051.79 |
|                             | H           | 0.63675400  | -2.28681000 | -0.16103900 | 432.09  | 1300.22 | 3056.10 |
|                             | H           | 3.07399900  | -1.81906200 | 0.04371000  | 460.92  | 1322.60 | 3061.41 |
|                             | H           | 2.41341700  | -1.04034700 | -1.39258600 | 506.02  | 1335.28 | 3084.13 |
|                             | H           | 3.02607900  | 0.27184800  | 1.29290500  | 628.12  | 1340.04 | 3091.32 |
|                             | H           | 3.86503100  | 0.57652400  | -0.22229200 | 742.53  | 1362.45 | 3098.68 |
|                             | H           | -0.01015000 | -0.22423800 | -1.38015400 | 794.92  | 1367.09 | 3100.95 |
|                             | C           | -1.43386100 | -0.55472600 | 0.19168500  | 843.15  | 1376.89 | 3103.80 |
|                             | H           | -1.44126400 | -0.60415000 | 1.28893300  | 853.62  | 1396.08 | 3126.42 |
|                             | H           | -1.69848200 | -1.55894300 | -0.16175500 | 864.96  | 1403.50 | 3132.80 |
|                             | C           | -2.50657400 | 0.42923200  | -0.27421400 | 908.91  | 1412.32 | 3205.84 |
| H                           | -2.42600200 | 0.56307000  | -1.35903600 | 920.08      | 1414.29 |         |         |

|            |                             |                             |             |             |         |         |         |
|------------|-----------------------------|-----------------------------|-------------|-------------|---------|---------|---------|
|            | H                           | -2.33035100                 | 1.41141900  | 0.17397600  | 938.75  | 1468.79 |         |
|            | C                           | -3.91412800                 | -0.04198200 | 0.08475100  | 973.23  | 1474.08 |         |
|            | H                           | -4.67263500                 | 0.67461800  | -0.23632300 | 1029.63 | 1482.98 |         |
|            | H                           | -4.13635500                 | -1.00178900 | -0.38872300 | 1059.64 | 1491.20 |         |
|            | H                           | -4.01451500                 | -0.17486900 | 1.16528900  | 1068.69 | 1497.04 |         |
|            | Rotational constants (GHZ): |                             |             |             |         |         |         |
|            |                             | 3.89196                     | 0.78133     | 0.68465     |         |         |         |
| <i>nP7</i> | C                           | 2.40748300                  | -1.08088000 | 0.24891200  |         |         |         |
|            | C                           | 0.96316000                  | -1.34727300 | -0.19911300 | 66.80   | 1079.97 | 1499.43 |
|            | C                           | 0.00837900                  | -0.22942500 | 0.23457000  | 74.25   | 1106.29 | 1504.95 |
|            | C                           | 0.49440600                  | 1.11583400  | -0.31641800 | 125.62  | 1111.19 | 1512.27 |
|            | C                           | 1.93474500                  | 1.42722300  | 0.12055700  | 161.12  | 1129.14 | 2957.00 |
|            | C                           | 2.85388100                  | 0.28455300  | -0.15610400 | 211.60  | 1149.00 | 2960.26 |
|            | H                           | 0.93587600                  | -1.42378000 | -1.29323900 | 242.19  | 1166.82 | 3000.39 |
|            | H                           | 0.61789100                  | -2.30639500 | 0.19948100  | 252.22  | 1229.65 | 3024.31 |
|            | H                           | 2.44680200                  | -1.17238900 | 1.34819400  | 296.50  | 1235.90 | 3035.84 |
|            | H                           | 3.07960200                  | -1.84592300 | -0.14691600 | 351.61  | 1276.42 | 3041.59 |
|            | H                           | 0.44771800                  | 1.08007800  | -1.41250000 | 358.54  | 1286.96 | 3049.20 |
|            | H                           | -0.16434100                 | 1.92472100  | 0.00968200  | 446.76  | 1303.58 | 3055.83 |
|            | H                           | 2.29042800                  | 2.34084500  | -0.36163300 | 449.14  | 1317.93 | 3061.10 |
|            | H                           | 1.92178700                  | 1.63521500  | 1.20464800  | 517.05  | 1330.09 | 3087.60 |
|            | H                           | 3.89690000                  | 0.47025900  | -0.38091900 | 637.63  | 1342.90 | 3092.85 |
|            | H                           | 0.02948300                  | -0.17263400 | 1.33385500  | 741.50  | 1350.57 | 3096.86 |
|            | C                           | -1.42413900                 | -0.55391300 | -0.19731400 | 781.74  | 1372.60 | 3097.64 |
|            | H                           | -1.68505700                 | -1.54938900 | 0.18274400  | 808.38  | 1380.78 | 3105.68 |
|            | H                           | -1.45704800                 | -0.62673000 | -1.29266000 | 864.06  | 1400.79 | 3126.45 |
|            | C                           | -2.48379300                 | 0.44191800  | 0.27362800  | 897.73  | 1403.51 | 3132.64 |
|            | H                           | -2.32067900                 | 1.41396000  | -0.20013000 | 907.81  | 1411.99 | 3203.68 |
|            | H                           | -2.37592400                 | 0.59926800  | 1.35291900  | 919.96  | 1414.18 |         |
|            | C                           | -3.90002500                 | -0.03702900 | -0.03844900 | 954.72  | 1469.47 |         |
|            | H                           | -4.65026600                 | 0.68689600  | 0.28563700  | 979.75  | 1477.60 |         |
|            | H                           | -4.02791800                 | -0.19418200 | -1.11280200 | 1029.70 | 1480.59 |         |
|            | H                           | -4.10984100                 | -0.98586800 | 0.46202800  | 1043.81 | 1487.74 |         |
|            |                             | Rotational constants (GHZ): |             |             |         | 1062.66 | 1495.16 |
|            |                             | 3.76253                     | 0.79108     | 0.68781     |         |         |         |



|                             |             |             |             |             |         |         |         |
|-----------------------------|-------------|-------------|-------------|-------------|---------|---------|---------|
| <i>iP1</i>                  | C           | -2.04346600 | -1.01896200 | -0.49146700 |         |         |         |
|                             | C           | -0.56900400 | -1.30746000 | -0.20104400 | 43.55   | 1058.66 | 1498.82 |
|                             | C           | 0.30802400  | -0.07495800 | -0.44528100 | 75.70   | 1075.00 | 1509.75 |
|                             | C           | -0.19743400 | 1.10182300  | 0.39684200  | 120.11  | 1095.23 | 1511.53 |
|                             | C           | -1.67414700 | 1.39692400  | 0.11827300  | 208.50  | 1118.23 | 3004.96 |
|                             | C           | -2.54294400 | 0.15900200  | 0.34722700  | 234.47  | 1149.29 | 3014.60 |
|                             | H           | -0.46754800 | -1.61518600 | 0.84715300  | 254.28  | 1164.82 | 3033.84 |
|                             | H           | -0.21478300 | -2.14241600 | -0.81505200 | 275.81  | 1195.55 | 3036.97 |
|                             | H           | -2.16262500 | -0.77985600 | -1.55533000 | 315.71  | 1216.14 | 3039.64 |
|                             | H           | -2.64813000 | -1.90898600 | -0.29699600 | 366.98  | 1252.82 | 3041.66 |
|                             | H           | -0.07003700 | 0.85644300  | 1.45915400  | 416.48  | 1292.79 | 3045.44 |
|                             | H           | 0.39947700  | 1.99687200  | 0.20148200  | 438.89  | 1299.71 | 3057.87 |
|                             | H           | -2.01664400 | 2.22356100  | 0.74679900  | 446.43  | 1303.50 | 3082.64 |
|                             | H           | -1.78422200 | 1.72435600  | -0.92295700 | 469.49  | 1321.35 | 3093.31 |
|                             | H           | -2.50412200 | -0.11527800 | 1.40859300  | 511.45  | 1342.55 | 3095.05 |
|                             | H           | -3.58821800 | 0.37860200  | 0.11338400  | 616.40  | 1368.01 | 3097.66 |
|                             | H           | 0.20191300  | 0.20182100  | -1.50489000 | 785.24  | 1371.47 | 3100.77 |
|                             | C           | 1.81365700  | -0.38898800 | -0.22479700 | 800.30  | 1386.55 | 3130.16 |
|                             | H           | 2.02936300  | -1.24374700 | -0.88114600 | 852.21  | 1387.90 | 3134.76 |
|                             | C           | 2.70562700  | 0.77695700  | -0.66212000 | 872.10  | 1395.36 | 3165.33 |
|                             | H           | 3.75496500  | 0.47520100  | -0.67110000 | 901.67  | 1407.03 | 3270.17 |
|                             | H           | 2.43947300  | 1.12246200  | -1.66438200 | 906.59  | 1410.32 |         |
|                             | H           | 2.61187700  | 1.62225800  | 0.02418100  | 926.65  | 1469.74 |         |
|                             | C           | 2.12759200  | -0.79732700 | 1.17780900  | 938.56  | 1484.07 |         |
|                             | H           | 2.57097300  | -0.09429100 | 1.87192700  | 970.55  | 1488.23 |         |
|                             | H           | 1.88085900  | -1.78388000 | 1.54652400  | 1026.40 | 1490.74 |         |
| Rotational constants (GHZ): |             |             |             | 1044.89     | 1495.40 |         |         |
|                             |             | 2.88853     | 1.04768     | 0.91853     |         |         |         |
| <i>iP2</i>                  | C           | 1.77822000  | 1.34086900  | 0.22487500  | 57.18   | 1051.05 | 1497.35 |
|                             | C           | 0.29115200  | 1.10858900  | 0.50259800  | 101.87  | 1070.95 | 1497.95 |
|                             | C           | -0.29902100 | 0.02431600  | -0.42867500 | 136.71  | 1093.96 | 1509.59 |
|                             | C           | 0.51084700  | -1.27017900 | -0.28559800 | 153.31  | 1117.89 | 2980.95 |
|                             | C           | 1.99374800  | -1.03815200 | -0.58256500 | 170.17  | 1147.02 | 2984.77 |
|                             | C           | 2.57433800  | 0.03921600  | 0.33601400  | 242.18  | 1197.79 | 2996.40 |
|                             | H           | 0.15810900  | 0.78607200  | 1.54354400  | 259.66  | 1231.41 | 3032.81 |
|                             | H           | -0.26611700 | 2.04243300  | 0.38272800  | 309.60  | 1282.92 | 3036.87 |
|                             | H           | 1.89199800  | 1.74542600  | -0.78836200 | 365.56  | 1288.54 | 3039.79 |
|                             | H           | 2.17778100  | 2.09186600  | 0.91211900  | 395.82  | 1293.03 | 3041.80 |
|                             | H           | 0.41200300  | -1.64564400 | 0.74047800  | 437.13  | 1317.27 | 3045.55 |
|                             | H           | 0.09939300  | -2.03835600 | -0.94790600 | 451.74  | 1325.65 | 3071.11 |
|                             | H           | 2.55090400  | -1.97233700 | -0.47128800 | 494.69  | 1343.96 | 3082.39 |
|                             | H           | 2.10851800  | -0.72246900 | -1.62671500 | 543.97  | 1358.67 | 3089.11 |
|                             | H           | 2.53682700  | -0.31698700 | 1.37289500  | 773.81  | 1367.71 | 3091.17 |
|                             | H           | 3.62693800  | 0.21621500  | 0.09904100  | 798.31  | 1384.43 | 3093.76 |
|                             | H           | -0.16359800 | 0.38796900  | -1.45902700 | 836.93  | 1385.35 | 3095.05 |
|                             | C           | -1.77341700 | -0.15164200 | -0.19955400 | 864.27  | 1401.86 | 3100.05 |
|                             | C           | -2.67883700 | 0.96450500  | -0.61348100 | 900.00  | 1410.60 | 3118.86 |
|                             | H           | -3.67853800 | 0.59497900  | -0.86083500 | 906.95  | 1414.73 | 3127.44 |
| H                           | -2.81029000 | 1.70502800  | 0.19138100  | 934.30      | 1476.13 |         |         |

|            |                             |                             |             |             |         |         |         |
|------------|-----------------------------|-----------------------------|-------------|-------------|---------|---------|---------|
|            | H                           | -2.28571600                 | 1.49927500  | -1.48217200 | 938.73  | 1477.98 |         |
|            | C                           | -2.26041700                 | -1.08254000 | 0.86590800  | 980.25  | 1482.53 |         |
|            | H                           | -1.85202000                 | -2.09035700 | 0.75407900  | 989.67  | 1487.08 |         |
|            | H                           | -1.97575300                 | -0.73625700 | 1.87254400  | 1046.81 | 1488.41 |         |
|            | H                           | -3.35011600                 | -1.15674700 | 0.85037900  | 1048.94 | 1495.00 |         |
|            | Rotational constants (GHZ): |                             |             |             |         |         |         |
|            |                             | 2.86439                     | 1.03766     | 0.88568     |         |         |         |
| <i>iP3</i> | C                           | -2.03392400                 | -1.03509800 | -0.57378700 |         |         |         |
|            | C                           | -0.58450900                 | -1.33741000 | -0.17122300 | 28.96   | 1089.87 | 1503.76 |
|            | C                           | 0.27514700                  | -0.10863200 | -0.18186200 | 68.70   | 1095.14 | 1509.37 |
|            | C                           | -0.28474500                 | 1.08649000  | 0.53084800  | 186.96  | 1100.89 | 1515.67 |
|            | C                           | -1.74049800                 | 1.36393300  | 0.12815000  | 212.47  | 1121.96 | 2944.52 |
|            | C                           | -2.60246000                 | 0.10895300  | 0.26623100  | 227.54  | 1153.75 | 2949.71 |
|            | H                           | -0.59678800                 | -1.76854900 | 0.84622000  | 269.06  | 1174.06 | 3029.75 |
|            | H                           | -0.15564200                 | -2.10541400 | -0.82301000 | 274.89  | 1215.43 | 3036.13 |
|            | H                           | -2.05841100                 | -0.75038100 | -1.63163000 | 296.22  | 1260.34 | 3048.59 |
|            | H                           | -2.64803600                 | -1.93316300 | -0.46544200 | 354.62  | 1271.49 | 3048.81 |
|            | H                           | -0.25828700                 | 0.90827000  | 1.62133300  | 405.96  | 1290.72 | 3050.62 |
|            | H                           | 0.32610500                  | 1.97428500  | 0.35103500  | 441.47  | 1318.54 | 3055.01 |
|            | H                           | -2.14639600                 | 2.17650200  | 0.73677400  | 446.94  | 1328.19 | 3075.82 |
|            | H                           | -1.76091100                 | 1.69891000  | -0.91507300 | 492.17  | 1353.54 | 3095.59 |
|            | H                           | -2.63009000                 | -0.19621900 | 1.32001500  | 585.33  | 1360.47 | 3097.57 |
|            | H                           | -3.63295300                 | 0.32243700  | -0.03025900 | 731.10  | 1372.49 | 3101.59 |
|            | C                           | 1.75995000                  | -0.28648200 | -0.34367400 | 790.44  | 1384.03 | 3103.13 |
|            | H                           | 1.90980000                  | -1.04401700 | -1.12339000 | 849.25  | 1388.36 | 3119.18 |
|            | C                           | 2.48540000                  | 0.98792800  | -0.78353900 | 856.61  | 1397.43 | 3128.02 |
|            | H                           | 3.52185800                  | 0.76285800  | -1.04571800 | 886.75  | 1410.39 | 3130.05 |
|            | H                           | 2.00097600                  | 1.43796400  | -1.65351100 | 918.14  | 1415.28 | 3130.94 |
|            | H                           | 2.50552500                  | 1.73046400  | 0.01841700  | 926.35  | 1468.28 |         |
|            | C                           | 2.38864700                  | -0.83274400 | 0.95359200  | 931.41  | 1475.79 |         |
|            | H                           | 1.93168100                  | -1.77990300 | 1.24908900  | 965.59  | 1487.40 |         |
|            | H                           | 3.46196500                  | -0.99752900 | 0.82610600  | 978.35  | 1490.27 |         |
|            | H                           | 2.25156000                  | -0.11814500 | 1.77062600  | 1048.05 | 1490.91 |         |
|            |                             | Rotational constants (GHZ): |             |             |         | 1062.70 | 1496.35 |
|            |                             | 2.85141                     | 1.03141     | 0.88965     |         |         |         |

|                             |             |             |             |             |         |         |         |
|-----------------------------|-------------|-------------|-------------|-------------|---------|---------|---------|
| iP4                         | C           | -2.06950500 | -1.08535000 | -0.44525400 |         |         |         |
|                             | C           | -0.58594900 | -1.24243400 | -0.37264700 | 58.19   | 1065.00 | 1501.88 |
|                             | C           | 0.28684900  | -0.03330800 | -0.50833500 | 98.70   | 1083.67 | 1510.04 |
|                             | C           | -0.25189000 | 1.11729000  | 0.36124600  | 192.72  | 1107.97 | 1516.21 |
|                             | C           | -1.74516900 | 1.34874800  | 0.11799900  | 213.04  | 1127.04 | 2923.06 |
|                             | C           | -2.55301900 | 0.08646700  | 0.42016900  | 235.18  | 1143.41 | 2958.27 |
|                             | H           | -0.14721900 | -2.22030500 | -0.54549900 | 258.25  | 1178.43 | 3032.02 |
|                             | H           | -2.36683300 | -0.88425200 | -1.48919700 | 274.91  | 1213.39 | 3036.87 |
|                             | H           | -2.57132200 | -2.01274500 | -0.15819200 | 315.93  | 1227.26 | 3050.04 |
|                             | H           | -0.10296300 | 0.87176700  | 1.41878300  | 340.01  | 1261.51 | 3051.54 |
|                             | H           | 0.30742900  | 2.03421700  | 0.15665000  | 401.69  | 1272.01 | 3052.06 |
|                             | H           | -2.09936300 | 2.18054500  | 0.73283100  | 419.38  | 1310.31 | 3058.55 |
|                             | H           | -1.90223300 | 1.63753700  | -0.92894700 | 459.24  | 1320.83 | 3092.59 |
|                             | H           | -2.42766800 | -0.17407600 | 1.47709000  | 480.97  | 1348.70 | 3095.47 |
|                             | H           | -3.61907800 | 0.26173100  | 0.25312400  | 571.22  | 1362.09 | 3100.25 |
|                             | H           | 0.21329600  | 0.31474600  | -1.55670000 | 609.24  | 1364.18 | 3103.97 |
|                             | C           | 1.77225300  | -0.36721800 | -0.26149900 | 776.63  | 1375.54 | 3123.83 |
|                             | H           | 2.00817300  | -1.20293300 | -0.93255800 | 829.88  | 1382.92 | 3125.31 |
|                             | C           | 2.69263200  | 0.79699100  | -0.63028300 | 853.74  | 1387.08 | 3127.69 |
|                             | H           | 3.74052800  | 0.49207900  | -0.57611000 | 887.28  | 1403.61 | 3130.80 |
|                             | H           | 2.49644900  | 1.15522500  | -1.64447700 | 909.35  | 1414.25 | 3173.21 |
|                             | H           | 2.56114600  | 1.63696600  | 0.05717400  | 932.19  | 1422.09 |         |
|                             | C           | 2.04496900  | -0.83031100 | 1.17177400  | 934.04  | 1472.22 |         |
|                             | H           | 1.35983600  | -1.62603900 | 1.47428800  | 968.95  | 1485.78 |         |
|                             | H           | 3.06700300  | -1.20593100 | 1.26366100  | 972.34  | 1488.43 |         |
|                             | H           | 1.93578700  | -0.00377800 | 1.87905700  | 1035.01 | 1491.27 |         |
| Rotational constants (GHZ): |             |             |             | 1046.12     | 1500.74 |         |         |
| 2.89612                     |             |             |             | 1.03601     | 0.91524 |         |         |
| iP5                         | C           | 1.91310900  | 1.27621300  | -0.19724800 | 54.71   | 1087.66 | 1505.65 |
|                             | C           | 0.46409000  | 1.30196200  | 0.16035100  | 109.10  | 1108.89 | 1508.14 |
|                             | C           | -0.27378000 | 0.00115500  | -0.21990600 | 159.46  | 1111.11 | 1526.93 |
|                             | C           | 0.53731600  | -1.21161700 | 0.25746800  | 183.00  | 1138.08 | 2936.40 |
|                             | C           | 1.97152200  | -1.20597800 | -0.27403500 | 230.00  | 1145.34 | 2960.64 |
|                             | C           | 2.71364700  | 0.06747600  | 0.15072100  | 263.31  | 1168.13 | 3004.17 |
|                             | H           | 0.35039500  | 1.43701400  | 1.25262400  | 273.13  | 1195.03 | 3020.08 |
|                             | H           | -0.01598900 | 2.16421300  | -0.30588900 | 340.04  | 1233.68 | 3029.00 |
|                             | H           | 2.41183200  | 2.19859000  | -0.46803200 | 361.10  | 1255.38 | 3049.10 |
|                             | H           | 0.55579400  | -1.21083300 | 1.35671400  | 386.49  | 1277.04 | 3051.34 |
|                             | H           | 0.04767500  | -2.13758100 | -0.05081100 | 411.46  | 1307.82 | 3053.21 |
|                             | H           | 2.50716800  | -2.09128600 | 0.07927600  | 445.91  | 1331.02 | 3098.55 |
|                             | H           | 1.94816600  | -1.25666700 | -1.36827100 | 472.02  | 1348.51 | 3099.41 |
|                             | H           | 2.87051400  | 0.02429100  | 1.24241500  | 497.75  | 1354.61 | 3107.69 |
|                             | H           | 3.70638200  | 0.11020400  | -0.30328100 | 611.12  | 1365.53 | 3109.83 |
|                             | H           | -0.32847900 | -0.04111300 | -1.31832100 | 785.85  | 1369.38 | 3116.33 |
|                             | C           | -1.71669400 | -0.01464700 | 0.32135100  | 853.37  | 1373.41 | 3122.83 |
|                             | H           | -1.65473100 | -0.00875400 | 1.41847800  | 860.21  | 1402.01 | 3144.02 |
|                             | C           | -2.50474800 | 1.22346700  | -0.11738500 | 876.76  | 1403.95 | 3145.95 |
|                             | H           | -3.54796100 | 1.14480700  | 0.19708300  | 906.19  | 1407.14 | 3200.70 |
| H                           | -2.10252400 | 2.14444000  | 0.30649600  | 929.99      | 1421.78 |         |         |

|            |                             |                             |             |             |         |         |         |  |
|------------|-----------------------------|-----------------------------|-------------|-------------|---------|---------|---------|--|
|            | H                           | -2.49146500                 | 1.31739300  | -1.20866000 | 935.08  | 1469.71 |         |  |
|            | C                           | -2.47500800                 | -1.27442200 | -0.10790300 | 964.07  | 1474.44 |         |  |
|            | H                           | -2.04708300                 | -2.18458200 | 0.31352500  | 977.40  | 1487.71 |         |  |
|            | H                           | -3.51730400                 | -1.22217500 | 0.21517800  | 994.05  | 1490.65 |         |  |
|            | H                           | -2.46912500                 | -1.36960900 | -1.19900500 | 1067.54 | 1497.12 |         |  |
|            | Rotational constants (GHZ): |                             |             |             |         |         |         |  |
|            |                             | 2.95084                     | 1.05996     | 0.82880     |         |         |         |  |
| <i>iP6</i> | C                           | 1.74824000                  | 1.40279200  | 0.16843100  |         |         |         |  |
|            | C                           | 0.27519600                  | 1.08031400  | 0.46614900  | 40.52   | 1055.02 | 1504.08 |  |
|            | C                           | -0.22168900                 | -0.08192900 | -0.40262900 | 113.37  | 1086.34 | 1512.82 |  |
|            | C                           | 0.63556800                  | -1.32384700 | -0.12991300 | 200.76  | 1110.27 | 1515.39 |  |
|            | C                           | 2.11739000                  | -1.05881800 | -0.43769900 | 213.19  | 1129.20 | 2958.26 |  |
|            | C                           | 2.60058900                  | 0.17922700  | 0.24306400  | 235.55  | 1140.89 | 2960.70 |  |
|            | H                           | 0.18288400                  | 0.80470400  | 1.52262600  | 239.72  | 1174.38 | 2998.21 |  |
|            | H                           | -0.33468200                 | 1.97410200  | 0.30762500  | 255.85  | 1212.54 | 3031.80 |  |
|            | H                           | 1.80462400                  | 1.83277100  | -0.84661200 | 295.55  | 1232.62 | 3046.49 |  |
|            | H                           | 2.11646900                  | 2.17460800  | 0.84868800  | 340.27  | 1245.87 | 3051.71 |  |
|            | H                           | 0.54188000                  | -1.60837400 | 0.92387400  | 375.93  | 1294.42 | 3053.38 |  |
|            | H                           | 0.27451500                  | -2.16668000 | -0.72811500 | 431.93  | 1310.15 | 3060.25 |  |
|            | H                           | 2.72854200                  | -1.92036100 | -0.15794200 | 452.15  | 1320.58 | 3091.49 |  |
|            | H                           | 2.22404600                  | -0.94586600 | -1.53050500 | 473.70  | 1344.55 | 3095.68 |  |
|            | H                           | 3.64081200                  | 0.26398900  | 0.53285400  | 549.02  | 1351.66 | 3096.11 |  |
|            | H                           | -0.05456300                 | 0.19963500  | -1.45383000 | 638.36  | 1360.37 | 3101.71 |  |
|            | C                           | -1.73034000                 | -0.36824300 | -0.26028900 | 786.85  | 1378.35 | 3123.60 |  |
|            | H                           | -1.92587500                 | -1.27660900 | -0.84431100 | 799.33  | 1395.68 | 3126.64 |  |
|            | C                           | -2.16555300                 | -0.63941900 | 1.18233400  | 853.44  | 1401.63 | 3127.58 |  |
|            | H                           | -3.21558200                 | -0.94054600 | 1.21071200  | 897.75  | 1403.90 | 3136.08 |  |
|            | H                           | -1.57964100                 | -1.43449200 | 1.64822800  | 914.91  | 1411.11 | 3200.55 |  |
|            | H                           | -2.06641700                 | 0.26003700  | 1.79623300  | 927.18  | 1424.46 |         |  |
|            | C                           | -2.58064200                 | 0.75345200  | -0.86128800 | 948.11  | 1470.87 |         |  |
|            | H                           | -2.28811000                 | 0.96471500  | -1.89312300 | 966.34  | 1478.32 |         |  |
|            | H                           | -3.63850400                 | 0.47923700  | -0.85956800 | 971.41  | 1484.02 |         |  |
|            | H                           | -2.48294800                 | 1.67795700  | -0.28579500 | 1035.10 | 1490.36 |         |  |
|            | H                           | -2.48294800                 | 1.67795700  | -0.28579500 | 1041.12 | 1497.77 |         |  |
|            |                             | Rotational constants (GHZ): |             |             |         |         |         |  |
|            |                             |                             | 2.86046     | 1.03724     | 0.91995 |         |         |  |

|         |                             |             |             |             |         |         |         |
|---------|-----------------------------|-------------|-------------|-------------|---------|---------|---------|
| sBP1    | C                           | 1.96548500  | -1.41426800 | 0.10324500  |         |         |         |
|         | C                           | 0.57898700  | -1.13362600 | -0.48084700 | -67.87  | 1065.70 | 1501.67 |
|         | C                           | -0.05013800 | 0.14880700  | 0.08303300  | 58.33   | 1072.40 | 1502.40 |
|         | C                           | 0.92173400  | 1.32584900  | -0.08995900 | 90.99   | 1097.30 | 1508.33 |
|         | C                           | 2.30583300  | 1.03754300  | 0.49564700  | 125.53  | 1100.10 | 1517.52 |
|         | C                           | 2.90953700  | -0.23128400 | -0.10387200 | 199.69  | 1124.71 | 3003.03 |
|         | H                           | 0.65713700  | -1.03588700 | -1.57292400 | 226.18  | 1139.07 | 3021.00 |
|         | H                           | -0.07001100 | -1.99112800 | -0.28604800 | 234.46  | 1161.63 | 3021.58 |
|         | H                           | 1.86699200  | -1.60863500 | 1.17845200  | 260.46  | 1189.28 | 3031.63 |
|         | H                           | 2.38151200  | -2.32097700 | -0.34454100 | 326.31  | 1216.77 | 3036.27 |
|         | H                           | 1.02135500  | 1.54229200  | -1.16291800 | 345.24  | 1238.27 | 3040.55 |
|         | H                           | 0.51442600  | 2.22477300  | 0.37779700  | 398.92  | 1286.83 | 3044.96 |
|         | H                           | 2.96632800  | 1.89299600  | 0.32938200  | 415.67  | 1289.83 | 3050.81 |
|         | H                           | 2.21641300  | 0.91249100  | 1.58179600  | 441.20  | 1294.80 | 3055.44 |
|         | H                           | 3.07176100  | -0.08171300 | -1.17848200 | 442.48  | 1302.78 | 3092.57 |
|         | H                           | 3.88682000  | -0.43871700 | 0.34040400  | 466.53  | 1318.63 | 3093.74 |
|         | H                           | -0.20799000 | -0.00128400 | 1.16205400  | 537.27  | 1340.04 | 3095.11 |
|         | C                           | -1.42160800 | 0.45269200  | -0.55108900 | 609.58  | 1359.04 | 3098.09 |
|         | H                           | -1.25319900 | 0.66005300  | -1.61688200 | 780.74  | 1369.25 | 3107.27 |
|         | C                           | -2.08325100 | 1.68217400  | 0.07886200  | 794.53  | 1378.73 | 3108.20 |
|         | H                           | -1.53679200 | 2.60002200  | -0.14036200 | 798.00  | 1381.79 | 3120.36 |
|         | H                           | -3.10098700 | 1.80903300  | -0.29905900 | 844.13  | 1388.59 | 3146.03 |
|         | H                           | -2.13995400 | 1.57448100  | 1.16656000  | 868.01  | 1390.07 | 3169.78 |
|         | C                           | -2.39399300 | -0.75709900 | -0.48556800 | 902.80  | 1408.82 | 3270.91 |
|         | H                           | -3.33745400 | -0.43671800 | -0.94124500 | 910.07  | 1413.78 |         |
|         | H                           | -2.00551100 | -1.56420100 | -1.11103500 | 942.35  | 1466.04 |         |
|         | C                           | -2.64940800 | -1.26009600 | 0.89411300  | 957.36  | 1481.50 |         |
|         | H                           | -3.35753700 | -0.76557800 | 1.54562500  | 994.63  | 1487.39 |         |
|         | H                           | -2.07238400 | -2.07545800 | 1.31003900  | 1001.95 | 1488.49 |         |
|         | Rotational constants (GHZ): |             |             |             | 1036.26 | 1494.14 |         |
| 2.23370 |                             |             |             | 0.84515     | 0.68607 |         |         |
| sBP2    | C                           | 2.07723900  | -1.46898000 | 0.23990000  | 38.76   | 1062.03 | 1494.78 |
|         | C                           | 0.63264400  | -1.22317600 | -0.19793400 | 66.65   | 1075.88 | 1498.07 |
|         | C                           | 0.10748800  | 0.14715600  | 0.25313300  | 108.54  | 1094.45 | 1508.05 |
|         | C                           | 1.05202100  | 1.25299500  | -0.23446000 | 124.68  | 1110.32 | 1516.18 |
|         | C                           | 2.50092400  | 1.00579200  | 0.19465800  | 182.17  | 1130.31 | 2991.54 |
|         | C                           | 3.00051700  | -0.36213100 | -0.26932000 | 232.65  | 1136.70 | 2996.33 |
|         | H                           | 0.57625400  | -1.26819200 | -1.29449000 | 240.16  | 1173.49 | 3003.07 |
|         | H                           | -0.01932300 | -2.01520600 | 0.18029100  | 278.57  | 1189.59 | 3021.03 |
|         | H                           | 2.12214500  | -1.49854800 | 1.33560900  | 319.40  | 1224.40 | 3028.59 |
|         | H                           | 2.41653900  | -2.44535300 | -0.11679200 | 322.11  | 1243.72 | 3036.67 |
|         | H                           | 0.99942100  | 1.30129000  | -1.33134800 | 371.55  | 1289.39 | 3039.70 |
|         | H                           | 0.72703000  | 2.22562600  | 0.14209600  | 394.88  | 1293.69 | 3044.96 |
|         | H                           | 3.14507800  | 1.80024000  | -0.19212500 | 441.87  | 1298.40 | 3052.43 |
|         | H                           | 2.56083300  | 1.05497200  | 1.28899200  | 456.35  | 1314.28 | 3075.21 |
|         | H                           | 3.02030500  | -0.38632900 | -1.36586800 | 480.32  | 1337.02 | 3092.46 |
|         | H                           | 4.02581300  | -0.52976800 | 0.07162800  | 527.68  | 1353.09 | 3093.94 |
|         | H                           | 0.10744700  | 0.16793500  | 1.35465200  | 569.78  | 1367.57 | 3096.01 |
|         | C                           | -1.34661000 | 0.35290600  | -0.21136400 | 797.36  | 1380.15 | 3098.39 |

|      |                             |             |             |             |         |         |         |
|------|-----------------------------|-------------|-------------|-------------|---------|---------|---------|
|      | H                           | -1.36485500 | 0.23970200  | -1.30650700 | 803.87  | 1386.54 | 3103.80 |
|      | C                           | -1.87942500 | 1.76359700  | 0.11165900  | 848.63  | 1387.89 | 3123.22 |
|      | H                           | -1.35404100 | 2.53651800  | -0.45237300 | 870.71  | 1393.32 | 3126.22 |
|      | H                           | -2.94055200 | 1.83720800  | -0.13595400 | 896.70  | 1403.87 | 3136.25 |
|      | H                           | -1.76574900 | 1.97653900  | 1.17921800  | 906.79  | 1408.75 | 3166.88 |
|      | C                           | -2.25698200 | -0.68095900 | 0.37741700  | 938.37  | 1423.17 |         |
|      | H                           | -2.06037000 | -1.00651200 | 1.39535700  | 948.56  | 1478.23 |         |
|      | C                           | -3.60289900 | -0.94598200 | -0.20664900 | 974.41  | 1482.09 |         |
|      | H                           | -4.34871500 | -0.20289900 | 0.11265300  | 998.27  | 1487.47 |         |
|      | H                           | -3.57022200 | -0.91072100 | -1.29985800 | 1023.93 | 1489.17 |         |
|      | H                           | -3.98654300 | -1.92381500 | 0.09258300  | 1050.94 | 1493.42 |         |
|      | Rotational constants (GHZ): |             |             |             |         |         |         |
|      |                             | 2.50839     | 0.74216     | 0.60658     |         |         |         |
|      | <hr/>                       |             |             |             |         |         |         |
| sBP3 | C                           | 1.90934400  | -1.45324900 | 0.11084700  |         |         |         |
|      | C                           | 0.53996400  | -1.11629200 | -0.48550700 | 79.99   | 1061.49 | 1502.01 |
|      | C                           | -0.02747400 | 0.19187900  | 0.07896300  | 95.51   | 1069.77 | 1505.33 |
|      | C                           | 0.99094900  | 1.32435000  | -0.11853600 | 142.88  | 1082.18 | 1508.36 |
|      | C                           | 2.35572300  | 0.99102500  | 0.48586900  | 152.19  | 1098.05 | 1515.33 |
|      | C                           | 2.90707200  | -0.31285500 | -0.09129900 | 200.08  | 1125.86 | 2994.89 |
|      | H                           | 0.63093100  | -1.01684000 | -1.57626700 | 237.98  | 1135.62 | 3008.89 |
|      | H                           | -0.14794300 | -1.94540100 | -0.30125700 | 252.15  | 1157.01 | 3023.19 |
|      | H                           | 1.79275000  | -1.63985300 | 1.18573000  | 263.24  | 1192.38 | 3031.29 |
|      | H                           | 2.29120500  | -2.37820100 | -0.32984800 | 326.78  | 1222.00 | 3036.77 |
|      | H                           | 1.10690500  | 1.49860900  | -1.19719700 | 335.29  | 1248.36 | 3040.11 |
|      | H                           | 0.60528100  | 2.25480300  | 0.30697900  | 402.00  | 1278.38 | 3045.39 |
|      | H                           | 3.05502000  | 1.81309200  | 0.31046600  | 419.98  | 1290.73 | 3059.13 |
|      | H                           | 2.25327400  | 0.88815000  | 1.57321000  | 440.93  | 1295.43 | 3062.39 |
|      | H                           | 3.09124400  | -0.18112200 | -1.16464100 | 449.93  | 1302.40 | 3093.14 |
|      | H                           | 3.86766500  | -0.56048600 | 0.36851600  | 474.88  | 1318.04 | 3093.86 |
|      | H                           | -0.17443000 | 0.05881000  | 1.16157900  | 537.24  | 1339.25 | 3094.91 |
|      | C                           | -1.38489600 | 0.57218300  | -0.54288500 | 596.96  | 1367.30 | 3096.85 |
|      | H                           | -1.19842400 | 0.81716200  | -1.59975800 | 789.81  | 1369.18 | 3099.38 |
|      | C                           | -1.96600900 | 1.78030400  | 0.11933200  | 796.42  | 1379.42 | 3103.97 |
|      | H                           | -1.69457600 | 2.04955000  | 1.13258600  | 802.54  | 1383.58 | 3128.96 |
|      | H                           | -2.78598800 | 2.31632800  | -0.34213500 | 849.30  | 1386.29 | 3132.90 |
|      | C                           | -2.41636300 | -0.58425300 | -0.54829100 | 874.75  | 1389.07 | 3159.92 |
|      | H                           | -3.34012900 | -0.20529900 | -0.99628200 | 891.07  | 1411.29 | 3263.14 |
|      | H                           | -2.06282300 | -1.38289600 | -1.20674500 | 909.69  | 1417.03 |         |
|      | C                           | -2.72184500 | -1.14581200 | 0.83910800  | 937.12  | 1465.81 |         |
|      | H                           | -3.50016400 | -1.90966800 | 0.78723200  | 945.85  | 1481.86 |         |
|      | H                           | -1.83855000 | -1.60355200 | 1.29159000  | 992.40  | 1487.11 |         |
|      | H                           | -3.07003400 | -0.35686900 | 1.51063700  | 1012.11 | 1488.65 |         |
|      | Rotational constants (GHZ): |             |             |             | 1043.99 | 1494.22 |         |
|      |                             | 2.25206     | 0.83912     | 0.68432     |         |         |         |

|      |                             |             |             |             |         |         |         |
|------|-----------------------------|-------------|-------------|-------------|---------|---------|---------|
|      | C                           | -2.38989600 | -0.71971800 | -0.87229000 |         |         |         |
|      | C                           | -1.00512600 | -1.25144300 | -0.49542500 | 51.30   | 1055.71 | 1495.99 |
|      | C                           | 0.00898900  | -0.10973100 | -0.28937400 | 65.28   | 1068.81 | 1502.83 |
|      | C                           | -0.53151300 | 0.88012300  | 0.76248900  | 110.82  | 1076.11 | 1506.81 |
|      | C                           | -1.91377800 | 1.41422800  | 0.38100300  | 127.46  | 1092.03 | 1510.30 |
|      | C                           | -2.90742900 | 0.26980300  | 0.17338800  | 164.32  | 1116.25 | 2984.23 |
|      | H                           | -1.08121300 | -1.83162600 | 0.43269000  | 227.93  | 1144.69 | 3009.81 |
|      | H                           | -0.63169800 | -1.93276000 | -1.26535100 | 239.22  | 1201.88 | 3035.84 |
|      | H                           | -2.32765300 | -0.21447700 | -1.84400500 | 255.98  | 1222.78 | 3036.16 |
|      | H                           | -3.09201900 | -1.54945500 | -0.99197900 | 283.00  | 1253.77 | 3036.42 |
|      | H                           | -0.59961900 | 0.36592300  | 1.72947100  | 312.18  | 1283.81 | 3041.80 |
|      | H                           | 0.17726400  | 1.70408800  | 0.89228300  | 370.62  | 1290.65 | 3041.94 |
|      | H                           | -2.27822600 | 2.10022100  | 1.15074600  | 435.86  | 1297.61 | 3045.72 |
|      | H                           | -1.83258100 | 1.99308200  | -0.54728800 | 441.24  | 1327.26 | 3053.98 |
|      | H                           | -3.05179800 | -0.25632100 | 1.12514000  | 481.87  | 1330.82 | 3075.16 |
| sBP4 | H                           | -3.88374100 | 0.66205300  | -0.12399600 | 518.87  | 1354.67 | 3081.19 |
|      | H                           | 0.08085400  | 0.43386700  | -1.24296300 | 536.61  | 1360.90 | 3088.45 |
|      | C                           | 1.37940800  | -0.62430300 | 0.05299300  | 773.55  | 1365.61 | 3092.75 |
|      | C                           | 1.63959400  | -1.18480500 | 1.41551800  | 786.22  | 1372.24 | 3094.12 |
|      | H                           | 0.76548100  | -1.70024100 | 1.82181200  | 796.53  | 1385.89 | 3094.68 |
|      | H                           | 2.47213700  | -1.89380500 | 1.39687300  | 828.11  | 1386.55 | 3099.71 |
|      | H                           | 1.90792500  | -0.39941000 | 2.13971600  | 864.06  | 1397.47 | 3121.39 |
|      | C                           | 2.54487300  | -0.18150900 | -0.77581300 | 900.77  | 1405.96 | 3128.27 |
|      | H                           | 3.40905800  | -0.82372400 | -0.57772000 | 903.51  | 1415.83 | 3130.00 |
|      | H                           | 2.30471100  | -0.28943700 | -1.84016600 | 935.70  | 1477.41 |         |
|      | C                           | 2.93594100  | 1.28472800  | -0.50854900 | 943.86  | 1481.43 |         |
|      | H                           | 3.79801400  | 1.58084800  | -1.11082500 | 991.34  | 1485.78 |         |
|      | H                           | 2.10758000  | 1.95481800  | -0.75236900 | 998.04  | 1487.93 |         |
|      | H                           | 3.18914800  | 1.43212900  | 0.54428900  | 1022.59 | 1489.78 |         |
|      | Rotational constants (GHZ): |             |             |             | 1052.52 | 1493.03 |         |
|      |                             | 2.24019     | 0.76628     | 0.71028     |         |         |         |
|      | C                           | -2.25964000 | -0.39989300 | -1.07367900 | 40.47   | 1077.16 | 1502.10 |
|      | C                           | -0.95085900 | -1.15416100 | -0.80109800 | 57.16   | 1090.79 | 1503.75 |
|      | C                           | 0.04765400  | -0.30257600 | -0.07734200 | 128.68  | 1095.07 | 1504.01 |
|      | C                           | -0.46402900 | 0.41554700  | 1.13616100  | 188.26  | 1100.17 | 1508.59 |
|      | C                           | -1.77877700 | 1.15515800  | 0.84837700  | 193.28  | 1116.82 | 2946.36 |
|      | C                           | -2.80818700 | 0.22093100  | 0.21163700  | 223.92  | 1154.32 | 2952.63 |
|      | H                           | -1.19048300 | -2.04352200 | -0.19041800 | 229.59  | 1173.48 | 3023.14 |
|      | H                           | -0.52254900 | -1.53019100 | -1.73543700 | 247.73  | 1213.53 | 3035.77 |
|      | H                           | -2.06581800 | 0.39544900  | -1.80225000 | 282.40  | 1253.97 | 3046.71 |
| sBP5 | H                           | -2.99605300 | -1.07484600 | -1.51821200 | 318.71  | 1264.99 | 3048.16 |
|      | H                           | -0.65111000 | -0.31541200 | 1.94299100  | 381.85  | 1288.51 | 3049.24 |
|      | H                           | 0.28183000  | 1.11406300  | 1.52526000  | 427.87  | 1298.02 | 3053.22 |
|      | H                           | -2.17347000 | 1.58789000  | 1.77160900  | 439.76  | 1311.87 | 3056.74 |
|      | H                           | -1.57574200 | 1.98551300  | 0.16211700  | 478.56  | 1319.79 | 3078.76 |
|      | H                           | -3.05676200 | -0.57864900 | 0.92099500  | 491.12  | 1353.36 | 3083.69 |
|      | H                           | -3.73522500 | 0.76278100  | 0.00571400  | 583.60  | 1359.84 | 3095.41 |
|      | C                           | 1.51062000  | -0.62175300 | -0.21558600 | 724.06  | 1365.26 | 3097.29 |
|      | H                           | 1.67427200  | -0.95342200 | -1.24982200 | 791.38  | 1376.56 | 3097.81 |

|      |                             |             |             |             |         |         |         |
|------|-----------------------------|-------------|-------------|-------------|---------|---------|---------|
|      | C                           | 1.90373500  | -1.78482900 | 0.71519300  | 802.80  | 1386.25 | 3100.97 |
|      | H                           | 1.30012900  | -2.67330500 | 0.51565600  | 842.99  | 1396.99 | 3120.20 |
|      | H                           | 2.95614200  | -2.05096500 | 0.58410300  | 856.71  | 1400.18 | 3125.14 |
|      | H                           | 1.75522900  | -1.50079900 | 1.76114300  | 872.01  | 1410.39 | 3128.77 |
|      | C                           | 2.42865400  | 0.58529000  | 0.02541000  | 917.61  | 1415.33 | 3133.50 |
|      | H                           | 2.40523000  | 0.86033300  | 1.08558500  | 930.71  | 1468.64 |         |
|      | H                           | 3.45821700  | 0.27508200  | -0.18072500 | 957.33  | 1476.72 |         |
|      | C                           | 2.07176400  | 1.79310800  | -0.83716700 | 979.67  | 1486.37 |         |
|      | H                           | 2.79152000  | 2.60353000  | -0.70502700 | 1007.87 | 1490.35 |         |
|      | H                           | 2.06044900  | 1.51994300  | -1.89610900 | 1028.83 | 1495.09 |         |
|      | H                           | 1.07859500  | 2.17560000  | -0.58861100 | 1048.58 | 1499.52 |         |
|      | Rotational constants (GHZ): |             |             |             |         |         |         |
|      |                             | 1.93973     | 0.86298     | 0.76144     |         |         |         |
|      | <hr/>                       |             |             |             |         |         |         |
|      | C                           | 1.98305200  | -1.40939300 | 0.11962800  |         |         |         |
|      | C                           | 0.60196200  | -1.12733900 | -0.47916100 | 69.89   | 1054.83 | 1501.52 |
|      | C                           | -0.00545400 | 0.17995000  | 0.08095000  | 95.57   | 1073.92 | 1505.64 |
|      | C                           | 0.99738500  | 1.28140300  | -0.07972900 | 126.88  | 1088.86 | 1515.81 |
|      | C                           | 2.36795500  | 1.05693100  | 0.46625100  | 187.91  | 1117.76 | 1516.71 |
|      | C                           | 2.95477500  | -0.25023700 | -0.10505900 | 194.49  | 1144.77 | 2970.45 |
|      | H                           | 0.68373200  | -1.03446300 | -1.57005500 | 220.53  | 1146.97 | 3008.69 |
|      | H                           | -0.06250200 | -1.97194600 | -0.27627500 | 252.46  | 1171.89 | 3022.56 |
|      | H                           | 1.87426900  | -1.58033900 | 1.19813300  | 273.71  | 1197.26 | 3032.77 |
|      | H                           | 2.39041100  | -2.33097500 | -0.30518600 | 312.78  | 1217.48 | 3038.86 |
|      | H                           | 0.83429500  | 2.04088100  | -0.83727800 | 330.94  | 1250.33 | 3049.13 |
|      | H                           | 3.02559800  | 1.90147800  | 0.25122700  | 340.04  | 1264.82 | 3055.54 |
|      | H                           | 2.31871000  | 0.95388500  | 1.55997700  | 414.70  | 1295.33 | 3059.80 |
|      | H                           | 3.12709200  | -0.12368600 | -1.17973000 | 440.24  | 1308.42 | 3063.36 |
|      | H                           | 3.92246200  | -0.46506600 | 0.35719000  | 450.90  | 1315.99 | 3089.94 |
| sBP6 | H                           | -0.15868800 | 0.01757700  | 1.16167800  | 496.12  | 1337.32 | 3093.94 |
|      | C                           | -1.36188000 | 0.54431800  | -0.54826200 | 549.84  | 1347.49 | 3097.97 |
|      | H                           | -1.16352500 | 0.80868300  | -1.59617900 | 594.34  | 1352.39 | 3099.78 |
|      | C                           | -1.96059100 | 1.77335400  | 0.14296200  | 784.23  | 1367.31 | 3108.00 |
|      | H                           | -1.30929500 | 2.64366300  | 0.04464600  | 799.03  | 1371.86 | 3122.58 |
|      | H                           | -2.93391200 | 2.02731200  | -0.28492900 | 831.74  | 1382.59 | 3130.31 |
|      | H                           | -2.09853600 | 1.59139300  | 1.21247600  | 844.39  | 1387.32 | 3135.61 |
|      | C                           | -2.36423700 | -0.62177600 | -0.56666100 | 875.61  | 1414.15 | 3138.05 |
|      | H                           | -3.29005200 | -0.26306400 | -1.02844300 | 909.00  | 1418.66 | 3184.35 |
|      | H                           | -1.99025100 | -1.41423900 | -1.22113100 | 938.18  | 1421.52 |         |
|      | C                           | -2.68731000 | -1.21068000 | 0.80731000  | 952.19  | 1480.83 |         |
|      | H                           | -3.42371900 | -2.01199500 | 0.71907900  | 978.15  | 1485.18 |         |
|      | H                           | -1.79866500 | -1.63128400 | 1.28477000  | 1000.81 | 1488.99 |         |
|      | H                           | -3.10136500 | -0.45700600 | 1.48065900  | 1013.76 | 1493.47 |         |
|      | Rotational constants (GHZ): |             |             |             | 1038.58 | 1499.79 |         |
|      |                             | 2.24681     | 0.83312     | 0.67722     |         |         |         |



|                             |            |             |             |             |         |         |         |
|-----------------------------|------------|-------------|-------------|-------------|---------|---------|---------|
| sBP7                        | C          | -2.00813700 | -1.41026100 | -0.11592100 |         |         |         |
|                             | C          | -0.65476600 | -1.08121900 | 0.51638700  | 72.82   | 1069.42 | 1501.22 |
|                             | C          | -0.01051000 | 0.17106100  | -0.09309700 | 83.26   | 1088.41 | 1510.35 |
|                             | C          | -0.98572000 | 1.36304900  | 0.00962100  | 121.95  | 1109.77 | 1514.79 |
|                             | C          | -2.36366400 | 1.02592900  | -0.45433300 | 168.93  | 1111.64 | 1522.48 |
|                             | C          | -2.98787500 | -0.23868300 | 0.02990700  | 196.35  | 1127.73 | 2936.96 |
|                             | H          | -0.78390800 | -0.92147300 | 1.59646900  | 227.81  | 1148.42 | 2961.17 |
|                             | H          | 0.01048600  | -1.94073000 | 0.40262000  | 257.81  | 1165.48 | 3014.03 |
|                             | H          | -1.86275000 | -1.62236200 | -1.18113700 | 269.90  | 1184.60 | 3019.40 |
|                             | H          | -2.42725400 | -2.31194500 | 0.33889400  | 285.46  | 1232.83 | 3033.00 |
|                             | H          | -1.01455400 | 1.67491600  | 1.07057800  | 349.81  | 1244.97 | 3049.58 |
|                             | H          | -0.60368500 | 2.21818200  | -0.55107600 | 368.83  | 1276.52 | 3055.00 |
|                             | H          | -2.97371600 | 1.79022700  | -0.91956000 | 396.63  | 1300.43 | 3060.94 |
|                             | H          | -3.24845700 | -0.14179700 | 1.09805800  | 432.90  | 1306.89 | 3062.15 |
|                             | H          | -3.92134800 | -0.44363600 | -0.49928100 | 450.84  | 1331.73 | 3091.45 |
|                             | H          | 0.15360300  | -0.02066200 | -1.16293500 | 473.02  | 1342.86 | 3097.88 |
|                             | C          | 1.34830900  | 0.50493100  | 0.55324100  | 559.95  | 1359.29 | 3099.62 |
|                             | H          | 1.15034700  | 0.74474400  | 1.60727100  | 617.37  | 1363.85 | 3105.89 |
|                             | C          | 1.98953000  | 1.73990800  | -0.09258800 | 782.32  | 1370.86 | 3108.58 |
|                             | H          | 1.43942500  | 2.65246100  | 0.14134100  | 790.30  | 1373.92 | 3121.31 |
|                             | H          | 3.01388800  | 1.87417000  | 0.26400500  | 834.68  | 1382.10 | 3130.57 |
|                             | H          | 2.02323200  | 1.64372200  | -1.18202300 | 853.30  | 1403.80 | 3133.84 |
|                             | C          | 2.33178200  | -0.67950100 | 0.54692400  | 867.58  | 1408.57 | 3141.59 |
|                             | H          | 3.26884100  | -0.33928500 | 0.99957500  | 904.47  | 1415.38 | 3206.11 |
|                             | H          | 1.95792500  | -1.47410900 | 1.19817800  | 935.87  | 1419.20 |         |
|                             | C          | 2.62524400  | -1.25540500 | -0.83883400 | 942.95  | 1467.86 |         |
|                             | H          | 3.38470000  | -2.03754000 | -0.77938300 | 979.25  | 1474.18 |         |
|                             | H          | 1.73206000  | -1.69678600 | -1.28798700 | 1000.54 | 1487.65 |         |
| H                           | 2.99600400 | -0.48694500 | -1.52144300 | 1011.69     | 1495.75 |         |         |
| Rotational constants (GHZ): |            |             |             | 1034.21     | 1499.16 |         |         |
| 2.22177                     |            |             |             | 0.84186     | 0.68004 |         |         |
| sBP8                        | C          | 1.99667500  | -1.46995900 | 0.04149300  | 67.45   | 1041.73 | 1502.22 |
|                             | C          | 0.62535300  | -1.11989100 | -0.55685300 | 83.55   | 1086.43 | 1510.90 |
|                             | C          | 0.03576700  | 0.16314500  | 0.04465600  | 122.98  | 1091.32 | 1516.33 |
|                             | C          | 1.03130900  | 1.31971900  | -0.12889000 | 188.53  | 1118.77 | 1523.48 |
|                             | C          | 2.40730300  | 1.00436500  | 0.47717400  | 207.35  | 1131.71 | 2953.90 |
|                             | C          | 2.92917000  | -0.30760900 | -0.00134300 | 221.15  | 1147.00 | 2958.83 |
|                             | H          | 0.72770700  | -0.98215500 | -1.64107700 | 244.33  | 1174.21 | 3002.63 |
|                             | H          | -0.05170500 | -1.96337100 | -0.40254400 | 261.56  | 1186.49 | 3022.93 |
|                             | H          | 1.83911600  | -1.77696900 | 1.09044800  | 285.91  | 1232.66 | 3036.44 |
|                             | H          | 2.42352500  | -2.33615700 | -0.46965900 | 349.93  | 1240.01 | 3043.29 |
|                             | H          | 1.14773500  | 1.52090800  | -1.20159600 | 368.64  | 1287.54 | 3054.82 |
|                             | H          | 0.64295900  | 2.23068200  | 0.33128900  | 402.51  | 1298.33 | 3061.49 |
|                             | H          | 3.11144300  | 1.81096800  | 0.25947000  | 443.27  | 1309.38 | 3062.24 |
|                             | H          | 2.29644000  | 0.97855900  | 1.57528700  | 448.59  | 1313.18 | 3093.38 |
|                             | H          | 3.99563200  | -0.46722000 | -0.10143500 | 471.26  | 1345.46 | 3096.55 |
|                             | H          | -0.09922200 | 0.00222400  | 1.12541300  | 566.86  | 1350.07 | 3096.88 |
|                             | C          | -1.33989500 | 0.50962600  | -0.56263500 | 626.05  | 1365.51 | 3109.02 |
|                             | H          | -1.17132700 | 0.73786300  | -1.62416100 | 783.09  | 1374.58 | 3111.35 |

|      |                             |             |             |             |         |         |         |
|------|-----------------------------|-------------|-------------|-------------|---------|---------|---------|
|      | C                           | -1.94945200 | 1.75644000  | 0.09218200  | 787.70  | 1380.07 | 3120.61 |
|      | H                           | -1.40977500 | 2.66495300  | -0.17741500 | 814.29  | 1385.63 | 3130.20 |
|      | H                           | -2.98793000 | 1.88777200  | -0.22230200 | 835.65  | 1402.79 | 3134.06 |
|      | H                           | -1.93779500 | 1.67571100  | 1.18334700  | 893.63  | 1410.10 | 3143.29 |
|      | C                           | -2.33838900 | -0.66158300 | -0.51591700 | 918.59  | 1415.72 | 3204.42 |
|      | H                           | -3.28251400 | -0.31444800 | -0.94806100 | 938.41  | 1419.71 |         |
|      | H                           | -1.99290400 | -1.46948100 | -1.16627300 | 955.51  | 1469.53 |         |
|      | C                           | -2.60266000 | -1.21430100 | 0.88501900  | 985.46  | 1478.04 |         |
|      | H                           | -3.36835900 | -1.99207100 | 0.85600900  | 998.65  | 1483.32 |         |
|      | H                           | -1.70187500 | -1.65470300 | 1.31995900  | 1016.67 | 1496.34 |         |
|      | H                           | -2.95224400 | -0.43277800 | 1.56398600  | 1041.34 | 1499.88 |         |
|      | Rotational constants (GHZ): |             |             |             |         |         |         |
|      |                             | 2.18278     | 0.85233     | 0.68674     |         |         |         |
|      | <hr/>                       |             |             |             |         |         |         |
|      | C                           | -2.02085400 | 1.42023400  | -0.19927900 |         |         |         |
|      | C                           | -0.62917000 | 0.93369600  | -0.61252600 | 73.10   | 1029.65 | 1489.03 |
|      | C                           | -0.17545100 | -0.27426300 | 0.21516700  | 81.07   | 1058.69 | 1489.41 |
|      | C                           | -1.22698900 | -1.38840200 | 0.13981400  | 134.04  | 1078.15 | 1494.74 |
|      | C                           | -2.61424300 | -0.90380500 | 0.56404000  | 136.39  | 1096.37 | 1501.27 |
|      | C                           | -3.05360700 | 0.29505500  | -0.27818000 | 174.45  | 1109.05 | 1508.11 |
|      | H                           | -0.64140800 | 0.64660100  | -1.67331700 | 234.62  | 1122.37 | 1509.15 |
|      | H                           | 0.08860300  | 1.75371300  | -0.51666000 | 258.64  | 1139.20 | 2971.88 |
|      | H                           | -1.97637100 | 1.79308600  | 0.83156900  | 295.49  | 1174.49 | 3016.83 |
|      | H                           | -2.32550000 | 2.26253000  | -0.82636100 | 314.18  | 1189.99 | 3024.08 |
|      | H                           | -1.27504200 | -1.75463500 | -0.89463700 | 338.20  | 1212.24 | 3024.51 |
|      | H                           | -0.91154900 | -2.23424500 | 0.75897400  | 401.52  | 1246.17 | 3034.01 |
|      | H                           | -3.34065800 | -1.71663100 | 0.47958200  | 414.48  | 1274.95 | 3036.81 |
|      | H                           | -2.58674800 | -0.61077300 | 1.62068300  | 444.59  | 1291.84 | 3040.89 |
|      | H                           | -3.16210100 | -0.02101600 | -1.32304100 | 451.47  | 1297.88 | 3045.26 |
| iBP1 | H                           | -4.03325700 | 0.65396100  | 0.04878900  | 478.28  | 1304.42 | 3052.56 |
|      | H                           | -0.10840200 | 0.04200600  | 1.26561600  | 504.72  | 1329.85 | 3067.67 |
|      | C                           | 1.18958400  | -0.81158400 | -0.22334500 | 581.89  | 1339.45 | 3084.87 |
|      | H                           | 1.46634300  | -1.64844000 | 0.43052500  | 792.36  | 1355.50 | 3091.53 |
|      | H                           | 1.09279200  | -1.22766100 | -1.23469100 | 799.09  | 1368.26 | 3094.44 |
|      | C                           | 2.34996700  | 0.19741900  | -0.22198200 | 834.02  | 1380.56 | 3095.29 |
|      | H                           | 2.11775800  | 0.97918500  | -0.96364100 | 857.28  | 1385.88 | 3099.49 |
|      | C                           | 2.51952500  | 0.88334000  | 1.13736200  | 866.48  | 1387.84 | 3123.35 |
|      | H                           | 2.65788900  | 0.13503600  | 1.92364800  | 909.32  | 1396.22 | 3134.42 |
|      | H                           | 3.39540500  | 1.53622000  | 1.13438800  | 918.19  | 1407.76 | 3160.52 |
|      | H                           | 1.64923700  | 1.49137800  | 1.39350300  | 939.99  | 1410.83 | 3265.26 |
|      | C                           | 3.61475700  | -0.47492100 | -0.64129900 | 942.58  | 1464.87 |         |
|      | H                           | 3.59490500  | -1.28310900 | -1.36205600 | 980.01  | 1478.72 |         |
|      | H                           | 4.57698400  | -0.05782100 | -0.37151600 | 997.86  | 1482.90 |         |
|      | Rotational constants (GHZ): |             |             |             |         |         |         |
|      |                             | 2.78799     | 0.66629     | 0.61038     |         |         |         |

|              |                             |             |             |             |         |         |         |
|--------------|-----------------------------|-------------|-------------|-------------|---------|---------|---------|
|              | C                           | -1.75035400 | 1.47214000  | 0.43261800  |         |         |         |
|              | C                           | -0.41905100 | 0.99905700  | -0.15612800 | 54.38   | 1056.26 | 1490.13 |
|              | C                           | -0.17673400 | -0.49126500 | 0.10166400  | 68.65   | 1074.76 | 1494.32 |
|              | C                           | -1.35925700 | -1.32102400 | -0.40734400 | 109.51  | 1087.07 | 1502.14 |
|              | C                           | -2.68836400 | -0.85274900 | 0.18851900  | 120.07  | 1098.38 | 1508.73 |
|              | C                           | -2.91868000 | 0.63402200  | -0.08955600 | 151.33  | 1124.60 | 2977.23 |
|              | H                           | -0.41600700 | 1.17212400  | -1.24160200 | 163.93  | 1131.73 | 2981.39 |
|              | H                           | 0.40429000  | 1.58857800  | 0.25875400  | 235.82  | 1194.17 | 3006.28 |
|              | H                           | -1.70850200 | 1.38517200  | 1.52541300  | 255.89  | 1212.44 | 3011.90 |
|              | H                           | -1.90827700 | 2.53002800  | 0.20581500  | 309.23  | 1275.93 | 3021.97 |
|              | H                           | -1.40376000 | -1.23063400 | -1.50125300 | 330.33  | 1286.14 | 3030.18 |
|              | H                           | -1.19185500 | -2.37975100 | -0.18499800 | 385.66  | 1294.14 | 3036.90 |
|              | H                           | -3.51316400 | -1.44823300 | -0.21241100 | 408.94  | 1297.48 | 3040.15 |
|              | H                           | -2.67535700 | -1.01760900 | 1.27286700  | 439.09  | 1319.14 | 3045.15 |
|              | H                           | -3.01486000 | 0.78586900  | -1.17174300 | 446.80  | 1324.53 | 3062.98 |
| <i>i</i> BP2 | H                           | -3.85729300 | 0.96574900  | 0.36255600  | 486.83  | 1340.47 | 3068.16 |
|              | H                           | -0.10428300 | -0.63723300 | 1.18938000  | 556.50  | 1367.49 | 3069.03 |
|              | C                           | 1.14287100  | -0.97491900 | -0.53488300 | 781.51  | 1373.14 | 3084.36 |
|              | H                           | 1.25086900  | -2.04355000 | -0.29944700 | 793.95  | 1385.20 | 3089.99 |
|              | H                           | 1.04857800  | -0.89886300 | -1.62464700 | 800.88  | 1387.69 | 3093.64 |
|              | C                           | 2.35952400  | -0.23556200 | -0.07375800 | 849.77  | 1390.80 | 3095.22 |
|              | C                           | 2.98734900  | 0.82234700  | -0.92085900 | 865.08  | 1402.47 | 3099.38 |
|              | H                           | 2.60130000  | 1.82637000  | -0.68267200 | 910.37  | 1406.54 | 3115.68 |
|              | H                           | 4.07055600  | 0.86434600  | -0.76456700 | 931.89  | 1417.77 | 3122.58 |
|              | H                           | 2.80150000  | 0.65085200  | -1.98347900 | 943.87  | 1472.56 |         |
|              | C                           | 2.69889400  | -0.26889500 | 1.38091300  | 949.14  | 1474.14 |         |
|              | H                           | 2.43039100  | -1.22764400 | 1.83389100  | 974.35  | 1478.26 |         |
|              | H                           | 3.76634400  | -0.09627300 | 1.54675300  | 987.85  | 1484.18 |         |
|              | H                           | 2.16233600  | 0.51179800  | 1.94427600  | 1019.08 | 1487.51 |         |
|              | Rotational constants (GHZ): |             |             |             | 1038.58 | 1488.71 |         |
|              |                             | 2.49608     | 0.71113     | 0.65373     |         |         |         |
|              | C                           | -2.52690900 | -1.08901900 | -0.56388900 | 41.81   | 1061.13 | 1494.57 |
|              | C                           | -1.12812700 | -1.38074500 | -0.01660500 | 51.50   | 1091.61 | 1505.99 |
|              | C                           | -0.20461600 | -0.15204700 | -0.10955300 | 92.73   | 1109.80 | 1507.70 |
|              | C                           | -0.86406900 | 1.04572600  | 0.60454700  | 209.35  | 1115.15 | 1515.05 |
|              | C                           | -2.26174400 | 1.33907900  | 0.05481700  | 234.94  | 1116.76 | 2994.28 |
|              | C                           | -3.16218700 | 0.10606900  | 0.14916600  | 238.07  | 1152.10 | 3009.82 |
|              | H                           | -1.20211500 | -1.67722300 | 1.03787100  | 247.97  | 1187.76 | 3032.10 |
|              | H                           | -0.67281800 | -2.22034300 | -0.54968500 | 264.91  | 1200.86 | 3035.97 |
| <i>i</i> BP3 | H                           | -2.45420700 | -0.87022600 | -1.63634700 | 287.17  | 1203.18 | 3039.39 |
|              | H                           | -3.16150200 | -1.97390400 | -0.46423100 | 314.37  | 1243.89 | 3041.35 |
|              | H                           | -0.93330800 | 0.81172800  | 1.67478600  | 362.77  | 1288.69 | 3045.78 |
|              | H                           | -0.22100300 | 1.92611600  | 0.51534300  | 394.70  | 1291.59 | 3046.68 |
|              | H                           | -2.70825600 | 2.17969300  | 0.59307300  | 437.74  | 1298.60 | 3052.37 |
|              | H                           | -2.17794100 | 1.64370000  | -0.99573800 | 461.02  | 1321.75 | 3091.59 |
|              | H                           | -3.31529700 | -0.14612000 | 1.20567900  | 484.06  | 1325.77 | 3093.59 |
|              | H                           | -4.14790200 | 0.32104000  | -0.27223200 | 522.60  | 1345.17 | 3094.28 |
|              | H                           | -0.10168800 | 0.10930100  | -1.17331400 | 568.87  | 1357.89 | 3095.24 |
|              | C                           | 1.15220900  | -0.44715700 | 0.43967900  | 795.60  | 1371.20 | 3099.94 |

|      |                             |             |             |             |         |         |         |
|------|-----------------------------|-------------|-------------|-------------|---------|---------|---------|
|      | H                           | 1.22416700  | -0.76837600 | 1.47635100  | 807.47  | 1383.81 | 3119.17 |
|      | C                           | 2.40612800  | -0.17680900 | -0.32947800 | 840.55  | 1384.77 | 3123.62 |
|      | H                           | 2.30957800  | -0.65520600 | -1.31588000 | 864.11  | 1386.68 | 3127.68 |
|      | C                           | 2.59299100  | 1.33128300  | -0.57785800 | 899.07  | 1396.48 | 3134.35 |
|      | H                           | 2.71102000  | 1.85677200  | 0.37436000  | 907.31  | 1414.69 | 3157.83 |
|      | H                           | 3.48214500  | 1.51695300  | -1.18669800 | 928.22  | 1439.93 |         |
|      | H                           | 1.73115500  | 1.75856300  | -1.09609700 | 936.45  | 1480.83 |         |
|      | C                           | 3.63169200  | -0.75990800 | 0.37296600  | 954.92  | 1485.68 |         |
|      | H                           | 3.52266600  | -1.83599900 | 0.52503300  | 972.84  | 1488.49 |         |
|      | H                           | 4.54016900  | -0.58462900 | -0.20784600 | 1007.39 | 1490.96 |         |
|      | H                           | 3.76292600  | -0.29066700 | 1.35281100  | 1052.52 | 1492.73 |         |
|      | Rotational constants (GHZ): |             |             |             |         |         |         |
|      |                             | 2.80855     | 0.64608     | 0.57094     |         |         |         |
|      | <hr/>                       |             |             |             |         |         |         |
|      | C                           | -1.90176000 | -1.26096600 | -0.50487100 |         |         |         |
|      | C                           | -0.89509500 | -1.27445400 | 0.65426900  | 56.07   | 1072.03 | 1500.35 |
|      | C                           | -0.11186500 | 0.00000700  | 0.73119700  | 63.45   | 1078.61 | 1502.90 |
|      | C                           | -0.89507700 | 1.27447600  | 0.65423000  | 95.48   | 1096.64 | 1512.15 |
|      | C                           | -1.90179200 | 1.26096400  | -0.50487200 | 182.91  | 1108.10 | 1515.17 |
|      | C                           | -2.76684500 | -0.00001200 | -0.46345800 | 221.95  | 1112.97 | 2948.19 |
|      | H                           | -1.45712300 | -1.41509400 | 1.59511700  | 265.93  | 1172.23 | 2950.85 |
|      | H                           | -0.22220100 | -2.13261900 | 0.56874300  | 287.26  | 1187.87 | 3018.94 |
|      | H                           | -1.35240300 | -1.28706800 | -1.45344400 | 290.78  | 1209.95 | 3035.47 |
|      | H                           | -2.52805100 | -2.15648600 | -0.46902000 | 304.82  | 1231.56 | 3043.63 |
|      | H                           | -1.45706400 | 1.41516200  | 1.59509500  | 367.94  | 1256.27 | 3045.05 |
|      | H                           | -0.22216800 | 2.13262300  | 0.56864400  | 392.88  | 1285.04 | 3045.99 |
|      | H                           | -2.52810200 | 2.15646800  | -0.46897400 | 407.83  | 1296.79 | 3046.64 |
|      | H                           | -1.35247300 | 1.28710500  | -1.45346400 | 410.49  | 1317.36 | 3049.75 |
|      | H                           | -3.35969700 | -0.00002300 | 0.46001400  | 446.16  | 1321.27 | 3064.53 |
| iBP4 | H                           | -3.47558900 | -0.00002000 | -1.29590300 | 531.03  | 1356.74 | 3087.16 |
|      | C                           | 1.30209500  | 0.00000800  | 1.22156300  | 571.51  | 1363.59 | 3088.59 |
|      | H                           | 1.47709100  | 0.88171800  | 1.85104600  | 750.71  | 1365.78 | 3096.55 |
|      | H                           | 1.47708400  | -0.88168800 | 1.85106600  | 792.44  | 1376.92 | 3096.64 |
|      | C                           | 2.36332800  | -0.00001200 | 0.09386300  | 805.98  | 1378.10 | 3099.92 |
|      | H                           | 3.34466000  | -0.00002200 | 0.58288300  | 852.52  | 1385.99 | 3115.98 |
|      | C                           | 2.25948900  | -1.25603900 | -0.77091400 | 859.10  | 1406.01 | 3120.37 |
|      | H                           | 1.29858800  | -1.28177300 | -1.29456400 | 877.44  | 1410.31 | 3123.46 |
|      | H                           | 3.05126700  | -1.27680900 | -1.52386100 | 925.53  | 1421.37 | 3126.01 |
|      | H                           | 2.34209100  | -2.16442100 | -0.16777500 | 928.92  | 1467.42 |         |
|      | C                           | 2.25952400  | 1.25602300  | -0.77091000 | 943.23  | 1475.12 |         |
|      | H                           | 2.34209700  | 2.16440200  | -0.16775900 | 964.74  | 1482.84 |         |
|      | H                           | 3.05133200  | 1.27680100  | -1.52382400 | 978.66  | 1486.28 |         |
|      | H                           | 1.29864500  | 1.28176300  | -1.29460000 | 994.46  | 1490.73 |         |
|      | Rotational constants (GHZ): |             |             |             | 1043.76 | 1490.82 |         |
|      |                             | 2.07204     | 0.86140     | 0.76590     |         |         |         |

|             |                             |             |             |             |         |         |         |
|-------------|-----------------------------|-------------|-------------|-------------|---------|---------|---------|
|             | C                           | 2.66535200  | -0.88178800 | 0.53597500  |         |         |         |
|             | C                           | 1.28478000  | -1.39282500 | 0.11673300  | 55.81   | 1068.37 | 1498.25 |
|             | C                           | 0.21945600  | -0.27703200 | 0.20337800  | 89.81   | 1076.29 | 1502.00 |
|             | C                           | 0.69496900  | 0.91281400  | -0.56738100 | 106.99  | 1103.43 | 1507.96 |
|             | C                           | 2.04695600  | 1.44759000  | -0.22697000 | 166.40  | 1116.19 | 1518.01 |
|             | C                           | 3.09926600  | 0.32097000  | -0.30524500 | 203.07  | 1145.84 | 2987.29 |
|             | H                           | 1.32771900  | -1.75628200 | -0.91763100 | 237.49  | 1161.70 | 3008.55 |
|             | H                           | 0.98147300  | -2.23739800 | 0.74428900  | 264.52  | 1167.02 | 3022.65 |
|             | H                           | 2.63343700  | -0.58840400 | 1.59262100  | 291.57  | 1203.44 | 3035.96 |
|             | H                           | 3.40364700  | -1.68410500 | 0.45326600  | 312.83  | 1218.62 | 3039.97 |
|             | H                           | 0.24225000  | 1.14769400  | -1.52484800 | 316.75  | 1245.79 | 3043.00 |
|             | H                           | 2.32402100  | 2.27806000  | -0.87918000 | 340.80  | 1266.15 | 3045.32 |
|             | H                           | 2.04220500  | 1.83212500  | 0.80338000  | 407.32  | 1291.68 | 3048.50 |
|             | H                           | 3.20982000  | 0.01026300  | -1.35018000 | 437.29  | 1304.74 | 3050.29 |
|             | H                           | 4.07259200  | 0.69161000  | 0.02851000  | 452.35  | 1316.59 | 3067.34 |
| <i>iBP5</i> | H                           | 0.16189700  | 0.00361000  | 1.26728500  | 475.62  | 1341.81 | 3085.18 |
|             | C                           | -1.15179900 | -0.78061500 | -0.24754200 | 532.07  | 1343.40 | 3094.34 |
|             | H                           | -1.06304200 | -1.16184600 | -1.27316600 | 596.12  | 1351.90 | 3099.11 |
|             | H                           | -1.43655000 | -1.63683600 | 0.37830000  | 802.30  | 1368.32 | 3110.16 |
|             | C                           | -2.28206400 | 0.25536500  | -0.20023000 | 821.92  | 1371.50 | 3113.39 |
|             | H                           | -2.04488600 | 1.05504800  | -0.91147900 | 846.41  | 1384.67 | 3118.72 |
|             | C                           | -3.59866300 | -0.39110000 | -0.63158000 | 856.19  | 1395.49 | 3127.81 |
|             | H                           | -3.88846600 | -1.17459800 | 0.07608500  | 879.15  | 1403.95 | 3131.18 |
|             | H                           | -4.40743000 | 0.34278200  | -0.66709600 | 928.97  | 1420.37 | 3187.88 |
|             | H                           | -3.51164700 | -0.84873700 | -1.62039700 | 934.25  | 1427.32 |         |
|             | C                           | -2.42153000 | 0.88555800  | 1.18573600  | 937.66  | 1477.45 |         |
|             | H                           | -1.53923900 | 1.47192300  | 1.45201000  | 964.27  | 1482.37 |         |
|             | H                           | -3.28768400 | 1.55077800  | 1.22343000  | 978.28  | 1487.33 |         |
|             | H                           | -2.56045600 | 0.11069900  | 1.94756200  | 985.69  | 1490.35 |         |
|             | Rotational constants (GHZ): |             |             |             | 1042.86 | 1493.51 |         |
|             |                             | 2.80424     | 0.65547     | 0.60381     |         |         |         |
|             | C                           | -2.12288200 | 1.38792700  | -0.16482600 | 67.98   | 1062.08 | 1496.84 |
|             | C                           | -0.74340000 | 0.89905700  | -0.61187800 | 81.67   | 1087.11 | 1498.27 |
|             | C                           | -0.24914800 | -0.27719900 | 0.23685300  | 130.94  | 1107.34 | 1509.01 |
|             | C                           | -1.27790800 | -1.42344900 | 0.19264600  | 163.78  | 1126.60 | 1516.55 |
|             | C                           | -2.66079100 | -0.95463600 | 0.49992500  | 186.50  | 1136.02 | 2947.29 |
|             | C                           | -3.15977800 | 0.25578000  | -0.21663100 | 237.32  | 1141.02 | 2961.05 |
|             | H                           | -0.78760500 | 0.58098200  | -1.66329600 | 263.61  | 1172.81 | 3017.13 |
|             | H                           | -0.02993200 | 1.72670400  | -0.56270000 | 284.34  | 1201.80 | 3019.70 |
| <i>iBP6</i> | H                           | -2.05297100 | 1.75887000  | 0.86387100  | 295.92  | 1223.25 | 3036.22 |
|             | H                           | -2.44911800 | 2.22472700  | -0.78832900 | 313.03  | 1247.53 | 3044.20 |
|             | H                           | -1.25025400 | -1.85249200 | -0.82557700 | 366.26  | 1272.76 | 3045.56 |
|             | H                           | -0.97423100 | -2.22523800 | 0.87154600  | 409.36  | 1302.67 | 3049.52 |
|             | H                           | -3.35251100 | -1.60513000 | 1.02023400  | 423.38  | 1303.56 | 3050.52 |
|             | H                           | -3.34244700 | 0.00959000  | -1.27695900 | 453.69  | 1327.05 | 3065.29 |
|             | H                           | -4.11626700 | 0.58864500  | 0.19282300  | 458.79  | 1349.21 | 3089.07 |
|             | H                           | -0.18738500 | 0.06165600  | 1.27913700  | 510.89  | 1357.51 | 3094.00 |
|             | C                           | 1.12542600  | -0.78832600 | -0.20197800 | 632.22  | 1365.06 | 3098.81 |
|             | H                           | 1.41761200  | -1.61445500 | 0.46089600  | 788.72  | 1366.68 | 3100.07 |

|             |                             |             |             |             |         |         |         |
|-------------|-----------------------------|-------------|-------------|-------------|---------|---------|---------|
|             | H                           | 1.03215500  | -1.22023900 | -1.20719500 | 821.09  | 1372.17 | 3113.77 |
|             | C                           | 2.26309200  | 0.24045600  | -0.21565500 | 848.90  | 1399.65 | 3119.20 |
|             | H                           | 2.04030200  | 0.99478700  | -0.97908300 | 853.04  | 1401.83 | 3127.65 |
|             | C                           | 2.41112300  | 0.94793400  | 1.13177400  | 871.71  | 1403.88 | 3130.12 |
|             | H                           | 2.55408200  | 0.21457100  | 1.93269400  | 925.47  | 1410.08 | 3207.51 |
|             | H                           | 3.27816300  | 1.61308100  | 1.12852800  | 931.36  | 1421.96 |         |
|             | H                           | 1.53190400  | 1.54701800  | 1.37942400  | 937.40  | 1467.11 |         |
|             | C                           | 3.57424900  | -0.44368900 | -0.60481500 | 963.46  | 1473.62 |         |
|             | H                           | 3.48344200  | -0.95862400 | -1.56459700 | 977.78  | 1479.93 |         |
|             | H                           | 4.39030700  | 0.27878700  | -0.68282000 | 989.78  | 1488.27 |         |
|             | H                           | 3.85485400  | -1.18637600 | 0.14891300  | 1052.48 | 1493.63 |         |
|             | Rotational constants (GHZ): |             |             |             |         |         |         |
|             |                             | 2.81191     | 0.66028     | 0.60252     |         |         |         |
|             | <hr/>                       |             |             |             |         |         |         |
|             | C                           | -2.11102300 | 1.43272100  | -0.23104800 |         |         |         |
|             | C                           | -0.71829300 | 0.93665600  | -0.65064600 | 68.54   | 1042.23 | 1483.21 |
|             | C                           | -0.27186000 | -0.27233500 | 0.17826900  | 80.61   | 1056.66 | 1493.22 |
|             | C                           | -1.30648100 | -1.39743800 | 0.06036600  | 130.68  | 1085.18 | 1497.78 |
|             | C                           | -2.70428600 | -0.94316200 | 0.50417400  | 154.10  | 1103.25 | 1498.63 |
|             | C                           | -3.10369600 | 0.31925300  | -0.18513500 | 215.98  | 1117.94 | 1509.17 |
|             | H                           | -0.73834600 | 0.64628800  | -1.70900600 | 231.20  | 1135.61 | 1515.97 |
|             | H                           | 0.00065300  | 1.75523300  | -0.55512700 | 247.21  | 1152.96 | 2954.44 |
|             | H                           | -2.01981400 | 1.88593600  | 0.77166500  | 267.68  | 1173.09 | 2960.53 |
|             | H                           | -2.44905400 | 2.23038300  | -0.89681400 | 294.56  | 1201.81 | 3014.99 |
|             | H                           | -1.35151000 | -1.72276800 | -0.98634200 | 312.76  | 1231.32 | 3018.56 |
|             | H                           | -0.98604300 | -2.26046900 | 0.65254700  | 360.29  | 1232.98 | 3036.27 |
|             | H                           | -3.43858400 | -1.73313800 | 0.32946400  | 407.86  | 1283.26 | 3041.86 |
|             | H                           | -2.68044700 | -0.77802900 | 1.59525500  | 430.97  | 1291.13 | 3043.56 |
|             | H                           | -4.14831000 | 0.51711400  | -0.39160000 | 449.35  | 1306.83 | 3045.53 |
| <i>iBP7</i> | H                           | -0.23528700 | 0.03364200  | 1.23374700  | 459.79  | 1321.41 | 3049.95 |
|             | C                           | 1.11166600  | -0.78518400 | -0.23310700 | 527.22  | 1342.84 | 3065.04 |
|             | H                           | 1.37910200  | -1.62623300 | 0.42104700  | 640.06  | 1351.03 | 3089.05 |
|             | H                           | 1.04139800  | -1.19682500 | -1.24863000 | 782.06  | 1369.95 | 3096.80 |
|             | C                           | 2.25765000  | 0.23372500  | -0.19590300 | 798.12  | 1370.47 | 3097.01 |
|             | H                           | 2.06242000  | 1.00503200  | -0.94978400 | 838.02  | 1379.34 | 3098.60 |
|             | C                           | 2.37400600  | 0.91251900  | 1.16924800  | 863.36  | 1399.58 | 3113.62 |
|             | H                           | 2.49214200  | 0.16188400  | 1.95816400  | 904.71  | 1400.67 | 3119.41 |
|             | H                           | 3.24417400  | 1.57273900  | 1.20271500  | 918.69  | 1404.92 | 3127.88 |
|             | H                           | 1.49152300  | 1.51128300  | 1.40616500  | 933.21  | 1411.27 | 3129.63 |
|             | C                           | 3.57343200  | -0.45384100 | -0.56261800 | 950.48  | 1421.88 | 3202.93 |
|             | H                           | 3.50487700  | -0.94871700 | -1.53470300 | 963.60  | 1469.12 |         |
|             | H                           | 4.39715500  | 0.26296900  | -0.60372200 | 977.45  | 1476.96 |         |
|             | H                           | 3.82725400  | -1.21379700 | 0.18335400  | 992.90  | 1478.99 |         |
|             | Rotational constants (GHZ): |             |             |             |         |         |         |
|             |                             | 2.76789     | 0.66650     | 0.60695     |         |         |         |

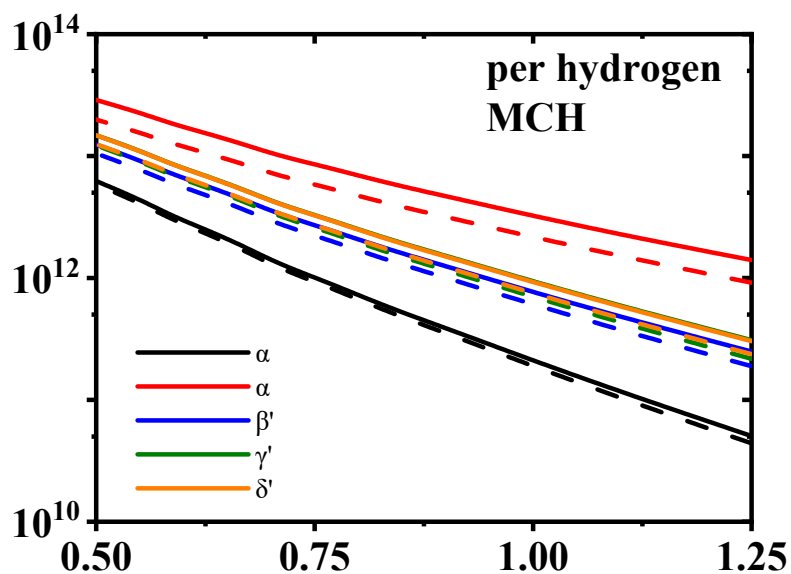

Figure S 1 Comparison of rate constants for H-atom abstractions (on a per hydrogen atom basis) by  $\dot{\text{H}}$  atom from methyl cyclohexane (MCH) at different positions ( $\alpha$ ,  $\alpha'$ ,  $\beta'$ ,  $\gamma'$ , and  $\delta'$ ). The solid lines shows calculations from this work at the QCISD(T)/MP2/CBS//M06-2X/6-311++G(d,p) level. The dashed lines show the results which calculate the geometry and frequencies of Wang et al.<sup>1</sup>with MESS program .

#### References

1. Z. Wang, L. Ye, W. Yuan, L. Zhang, Y. Wang, Z. Cheng, F. Zhang and F. Qi, *Combustion and flame*, 2014, **161**, 84-100.
